# Supplementary material for: Combining two genetic sexing strains allows sorting of non-transgenic males for Aedes genetic control
Source: PubMed Central journal article supplement (PMC10275924; doi:10.1038/s42003-023-05030-7), 2023-06-16

# Supplementary Data 2: Detailed statistical outputs

## Contents

|                                |           |
|--------------------------------|-----------|
| <b>Initial settings</b>        | <b>1</b>  |
| R version . . . . .            | 1         |
| Packages . . . . .             | 2         |
| Plot common settings . . . . . | 2         |
| <b>Figure 3</b>                | <b>3</b>  |
| Sex ratio . . . . .            | 3         |
| Hatching rate . . . . .        | 15        |
| Fecundity . . . . .            | 27        |
| Larva survival . . . . .       | 41        |
| <b>Figure 4</b>                | <b>51</b> |
| Competitiveness . . . . .      | 51        |
| Flight test . . . . .          | 65        |
| Adult survival . . . . .       | 77        |
| <b>Figure 5</b>                | <b>96</b> |
| Data . . . . .                 | 96        |
| Model . . . . .                | 96        |

## Initial settings

### R version

```
platform x86_64-w64-mingw32
arch x86_64
os mingw32
system x86_64, mingw32 major 4
minor 1.0
year 2021
svn rev 80317
language R
version.string R version 4.1.0 (2021-05-18) nickname Camp Pontanezen
```

## Packages

```
set.seed(2501)

libs <- c(
  'plyr', 'dplyr', 'tidyr', 'stringr',
  'ggeffects', 'lme4', 'multcomp',
  'performance', 'reshape2', 'icenReg',
  'survminer', 'survtools', 'survival',
  'ggplot2', 'ggpubr', 'viridis', 'cowplot'
)
invisible(lapply(libs, library, character.only = T))
```

Versions:

```
plyr_1.8.6, dplyr_1.0.7, tidyr_1.1.3, stringr_1.4.0
ggeffects_1.0.2, lme4_1.1-26, multcomp_1.4-16
performance_0.7.0, reshape2_1.4.4, icenReg_2.0.15
survminer_0.4.9, survtools_0.1, survival_3.2-11
ggplot2_3.3.5, ggpubr_0.4.0, viridis_0.5.1
```

## Plot common settings

```
# Panel background color
species.bg = c('Ae. aegypti' = 'white', 'Ae. albopictus' = 'grey')

# Aeg line colors
line.color.aeg = c('Bra (WT)' = "#24ff24", 'Aeg-M' = "#004949",
                  'Aeg-m' = "#009292", 'Aeg-CS' = "#006ddb")

# Alb line colors
line.color.alb = c('BiA (WT)' = "#24ff24", 'Aal-M' = "#004949",
                  'Aal-m' = "#009292", 'Aal-CS' = "#006ddb")

# Set of colors
pal <- c('1' = "#000000", '2' = "#004949", '3' = "#009292",
        '4' = "#ff6db6", '5' = "#ffb6db", '6' = "#490092",
        '7' = "#006ddb", '8' = "#b66dff", '9' = "#6db6ff",
        '10' = "#b6dbff", '11' = "#920000", '12' = "#924900",
        '13' = "#db6d00", '14' = "#24ff24", '15' = "#ffff6d")
```

## Figure 3

### Sex ratio

Ae. aegypti

Data .

```
# Data measurements
sr.aeg.rep = read.csv('data/Sex-ratio_aeg.csv', header = T, sep = ';')
sr.aeg.rep$sr = sr.aeg.rep$Males / (sr.aeg.rep$Males + sr.aeg.rep$Females) * 100
sr.aeg.rep$Line = factor(sr.aeg.rep$Line,
                        levels = c('Bra (WT)', 'Aaeg-M', 'Aaeg-m', 'Aaeg-CS'))
sr.aeg.rep
```

|    | Replicate | Line     | Males | Females | sr       |
|----|-----------|----------|-------|---------|----------|
| 1  | 2         | Bra (WT) | 97    | 100     | 49.23858 |
| 2  | 3         | Bra (WT) | 97    | 87      | 52.71739 |
| 3  | 4         | Bra (WT) | 126   | 95      | 57.01357 |
| 4  | 1         | Aaeg-M   | 562   | 512     | 52.32775 |
| 5  | 2         | Aaeg-M   | 912   | 837     | 52.14408 |
| 6  | 3         | Aaeg-M   | 592   | 580     | 50.51195 |
| 7  | 1         | Aaeg-m   | 1567  | 1301    | 54.63738 |
| 8  | 2         | Aaeg-m   | 320   | 309     | 50.87440 |
| 9  | 3         | Aaeg-m   | 1827  | 1693    | 51.90341 |
| 10 | 1         | Aaeg-CS  | 1089  | 916     | 54.31421 |
| 11 | 2         | Aaeg-CS  | 383   | 288     | 57.07899 |
| 12 | 3         | Aaeg-CS  | 660   | 582     | 53.14010 |

```
# Build binomial dataset
males.aeg =
  rbind(
    data.frame(replicate = sr.aeg.rep[1,1],
              treatment = sr.aeg.rep[1,2],
              result = rep(1, sr.aeg.rep[1,3])),
    data.frame(replicate = sr.aeg.rep[1,1],
              treatment = sr.aeg.rep[1,2],
              result = rep(0, sr.aeg.rep[1,4])))

for(i in 2:nrow(sr.aeg.rep)){
  males.aeg =
    rbind(
      males.aeg,
      data.frame(replicate = sr.aeg.rep[i,1],
                treatment = sr.aeg.rep[i,2],
                result = rep(1, sr.aeg.rep[i,3])),
      data.frame(replicate = sr.aeg.rep[i,1],
                treatment = sr.aeg.rep[i,2],
                result = rep(0, sr.aeg.rep[i,4]))
    )
}
males.aeg$treatment = factor(x = males.aeg$treatment,
```

```

      levels = c('Bra (WT)', 'Aaeg-M', 'Aaeg-m', 'Aaeg-CS'))
males.aeg$Species = "Ae. aegypti"

summary.sr.aeg = males.aeg %>% group_by(treatment) %>%
  dplyr::summarise(value = n(),
                  N = max(replicate)) %>% data.frame() %>%
  mutate(pos = c(1, 2, 3,4))

head(males.aeg)

```

```

  replicate treatment result Species
1         2 Bra (WT)      1 Ae. aegypti
2         2 Bra (WT)      1 Ae. aegypti
3         2 Bra (WT)      1 Ae. aegypti
4         2 Bra (WT)      1 Ae. aegypti
5         2 Bra (WT)      1 Ae. aegypti
6         2 Bra (WT)      1 Ae. aegypti

```

Model .

```

# Generalized linear model with Bernoulli distribution
sr.aeg = glm(formula = 'result ~ treatment',
             family = binomial,
             data = males.aeg)
summary(sr.aeg)

```

Call:

```
glm(formula = "result ~ treatment", family = binomial, data = males.aeg)
```

Deviance Residuals:

```

  Min      1Q  Median      3Q      Max
-1.253 -1.228  1.103  1.128  1.148

```

Coefficients:

```

              Estimate Std. Error z value Pr(>|z|)
(Intercept)    0.126414   0.081677   1.548   0.122
treatmentAaeg-M -0.057801   0.087599  -0.660   0.509
treatmentAaeg-m -0.009136   0.085106  -0.107   0.915
treatmentAaeg-CS 0.050668   0.087750   0.577   0.564

```

(Dispersion parameter for binomial family taken to be 1)

```

Null deviance: 21476 on 15531 degrees of freedom
Residual deviance: 21470 on 15528 degrees of freedom
AIC: 21478

```

Number of Fisher Scoring iterations: 3

```

# Pairwise comparison
pairwise.aeg = glht(sr.aeg, mcp(treatment="Tukey"))

```

```
summary(pairewise.aeg)
```

### Simultaneous Tests for General Linear Hypotheses

Multiple Comparisons of Means: Tukey Contrasts

Fit: glm(formula = "result ~ treatment", family = binomial, data = males.aeg)

Linear Hypotheses:

|                         | Estimate  | Std. Error | z value | Pr(> z ) |
|-------------------------|-----------|------------|---------|----------|
| Aaeg-M - Bra (WT) == 0  | -0.057801 | 0.087599   | -0.660  | 0.9063   |
| Aaeg-m - Bra (WT) == 0  | -0.009136 | 0.085106   | -0.107  | 0.9995   |
| Aaeg-CS - Bra (WT) == 0 | 0.050668  | 0.087750   | 0.577   | 0.9347   |
| Aaeg-m - Aaeg-M == 0    | 0.048666  | 0.039679   | 1.226   | 0.5924   |
| Aaeg-CS - Aaeg-M == 0   | 0.108469  | 0.045071   | 2.407   | 0.0689 . |
| Aaeg-CS - Aaeg-m == 0   | 0.059804  | 0.040012   | 1.495   | 0.4216   |

---

Signif. codes: 0 '\*\*\*' 0.001 '\*\*' 0.01 '\*' 0.05 '.' 0.1 ' ' 1  
(Adjusted p values reported -- single-step method)

Replication

|   | Line     | N | n    |
|---|----------|---|------|
| 1 | Bra (WT) | 4 | 602  |
| 2 | Aaeg-M   | 3 | 3995 |
| 3 | Aaeg-m   | 3 | 7017 |
| 4 | Aaeg-CS  | 3 | 3918 |

Model fit quality

```
check_model(sr.aeg)
```

### Posterior Predictive Check

Model-predicted lines should resemble observed data

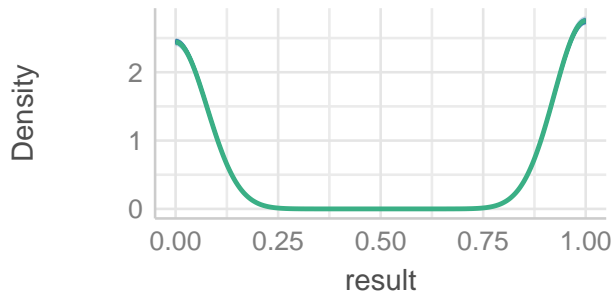

### Binned Residuals

Points should be within error bounds

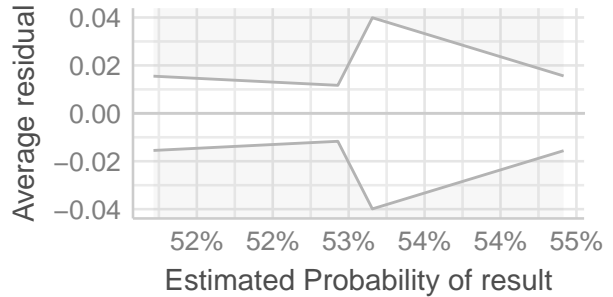

— predicted data — Observed data — Observed data

### Influential Observations

Points should be inside the contour lines

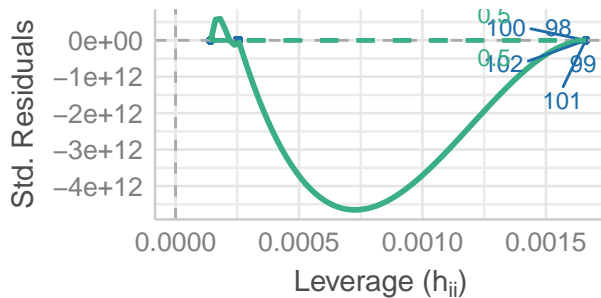

### Normality of Residuals

Dots should fall along the line

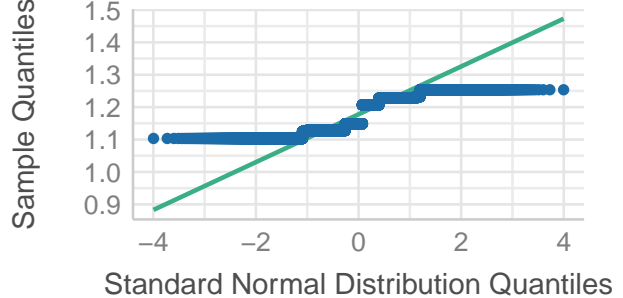

### Plot

```
# Extraction of the results
pred.sr.aeg = ggpredict(model = sr.aeg, terms = c("treatment")) %>% data.frame()
pred.sr.aeg$Species = "Ae. aegypti"

# plot
sr.plot.aeg =
  ggplot(data = NULL) +
  geom_point(data = sr.aeg.rep,
            aes(x = jitter(as.numeric(factor(Line))),
                factor = .5),
              y = sr, color = Line),
            alpha = .6, size = 2) +
  geom_point(data = pred.sr.aeg,
            aes(x = as.numeric(x),
                y = predicted * 100),
              color = 'black',
              size = 1.5) +
  geom_errorbar(data = pred.sr.aeg,
               aes(x = as.numeric(x),
                   ymin = conf.low* 100,
                   ymax = conf.high* 100),
               color = 'black',
```

```

        width = 0.05) +
annotate(geom = 'text',
         x = summary.sr.aeg$pos, y = 15,
         label = 'N = 3',
         size = 4) +
annotate(geom = 'text',
         x = summary.sr.aeg$pos, y = 7,
         label = paste0('n = ', summary.sr.aeg$value),
         size = 3.5) +
annotate(geom = 'line', x = 1:4, y = 90) +
annotate(geom = 'text', x = 2.5, y = 95,
         label = 'n.s.',
         size = 4) +
annotate(geom = 'line', x = 1:3, y = 80) +
annotate(geom = 'text', x = 2, y = 85,
         label = 'n.s.',
         size = 4) +
annotate(geom = 'line', x = 1:2, y = 70) +
annotate(geom = 'text', x = 1.5, y = 75,
         label = 'n.s.',
         size = 4) +
scale_x_continuous(breaks = 1:4,
                  labels = c("Bra (WT)",
                           "Aaeg-M",
                           "Aaeg-m",
                           "Aaeg-CS"),
                  limits = c(.5,4.5), guide = guide_axis(angle = 30)) +
scale_y_continuous(breaks = c(0, 50, 100), limits = c(0, 100)) +
scale_color_manual(values = line.color.aeg, labels = names(line.color.aeg)) +
labs(x = 'Line',
     y = 'Percentage of males (%)') +
theme_classic() +
theme(panel.background =
      element_rect(fill = species.bg[names(species.bg)=="Ae. aegypti"]),
      legend.position = 'none',
      axis.title.y = element_text(color = 'black',
                                  size = 12),
      axis.text.y = element_text(size = 10,
                                 hjust = 0, vjust = 0),
      axis.title.x = element_text(color = 'black',
                                  size = 12),
      axis.text.x = element_text(size = 10))
sr.plot.aeg

```

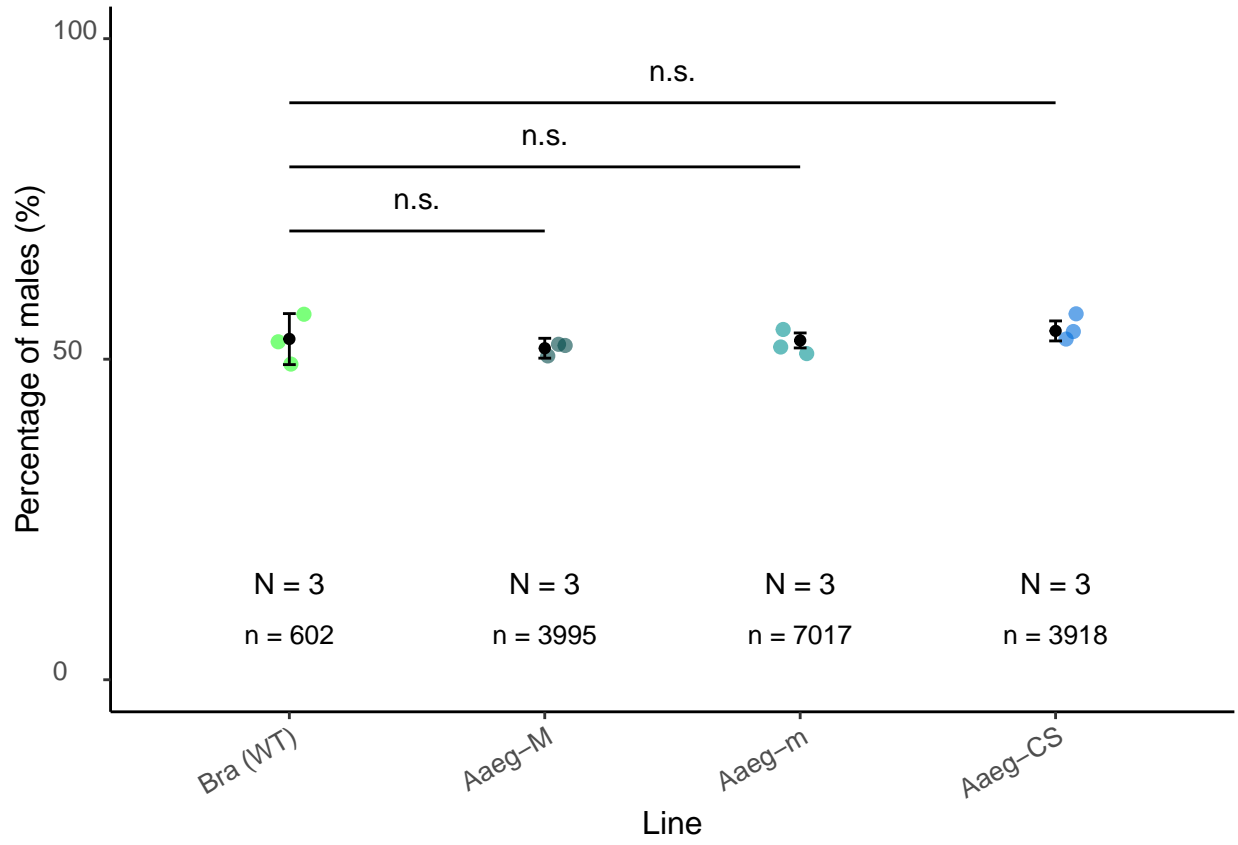



## Ae. albopictus

### Data

```
# Data measurements
sr.alb.rep = read.table("data/Sex-ratio_albo.csv", header=T, sep=";")
sr.alb.rep$sr = sr.alb.rep$Males /
  (sr.alb.rep$Males + sr.alb.rep$Females) * 100
sr.alb.rep$Line = factor(sr.alb.rep$Line,
  levels = c('BiA (WT)', 'Aal-M', 'Aal-m', 'Aal-CS'))
sr.alb.rep
```

|    | Replicate | Line     | Males | Females | sr       |
|----|-----------|----------|-------|---------|----------|
| 1  | A         | Aal-m    | 167   | 166     | 50.15015 |
| 2  | B         | Aal-m    | 245   | 246     | 49.89817 |
| 3  | C         | Aal-m    | 293   | 274     | 51.67549 |
| 4  | D         | Aal-CS   | 136   | 119     | 53.33333 |
| 5  | E         | Aal-CS   | 533   | 493     | 51.94932 |
| 6  | F         | Aal-CS   | 510   | 471     | 51.98777 |
| 7  | J         | Aal-M    | 232   | 223     | 50.98901 |
| 8  | K         | Aal-M    | 553   | 537     | 50.73394 |
| 9  | L         | Aal-M    | 184   | 183     | 50.13624 |
| 10 | 1         | BiA (WT) | 47    | 45      | 51.08696 |
| 11 | 2         | BiA (WT) | 74    | 67      | 52.48227 |
| 12 | 3         | BiA (WT) | 76    | 63      | 54.67626 |

```
# Build binomial dataset
males.albo =
  rbind(
    data.frame(replicate = sr.alb.rep[1,1],
      treatment = sr.alb.rep[1,2],
      result = rep(1, sr.alb.rep[1,3])),
    data.frame(replicate = sr.alb.rep[1,1],
      treatment = sr.alb.rep[1,2],
      result = rep(0, sr.alb.rep[1,4])))

for(i in 2:nrow(sr.alb.rep)){
  males.albo =
    rbind(
      males.albo,
      data.frame(replicate = sr.alb.rep[i,1],
        treatment = sr.alb.rep[i,2],
        result = rep(1, sr.alb.rep[i,3])),
      data.frame(replicate = sr.alb.rep[i,1],
        treatment = sr.alb.rep[i,2],
        result = rep(0, sr.alb.rep[i,4])))
    )
}

males.albo$treatment = factor(males.albo$treatment,
  levels = c('BiA (WT)', 'Aal-M', 'Aal-m', 'Aal-CS'))
males.albo$Species = "Ae. albopictus"
```

```
summary.sr.alb = males.albo %>%
  group_by(treatment) %>%
  dplyr::summarise(value = n()) %>%
  data.frame() %>%
  mutate(pos = c(1, 2, 3,4))

head(males.albo)
```

| replicate | treatment | result | Species          |
|-----------|-----------|--------|------------------|
| 1         | A         | Aal-m  | 1 Ae. albopictus |
| 2         | A         | Aal-m  | 1 Ae. albopictus |
| 3         | A         | Aal-m  | 1 Ae. albopictus |
| 4         | A         | Aal-m  | 1 Ae. albopictus |
| 5         | A         | Aal-m  | 1 Ae. albopictus |
| 6         | A         | Aal-m  | 1 Ae. albopictus |

## Model .

```
# Generalized linear model with Bernoulli distribution
sr.albo = glm(formula = 'result ~ treatment',
              family = binomial,
              data = males.albo)
summary(sr.albo)
```

Call:

```
glm(formula = "result ~ treatment", family = binomial, data = males.albo)
```

Deviance Residuals:

| Min    | 1Q     | Median | 3Q    | Max   |
|--------|--------|--------|-------|-------|
| -1.228 | -1.189 | 1.128  | 1.166 | 1.166 |

Coefficients:

|                 | Estimate | Std. Error | z value | Pr(> z ) |
|-----------------|----------|------------|---------|----------|
| (Intercept)     | 0.11842  | 0.10388    | 1.140   | 0.254    |
| treatmentAal-M  | -0.09122 | 0.11350    | -0.804  | 0.422    |
| treatmentAal-m  | -0.09110 | 0.11690    | -0.779  | 0.436    |
| treatmentAal-CS | -0.03349 | 0.11208    | -0.299  | 0.765    |

(Dispersion parameter for binomial family taken to be 1)

Null deviance: 8226.0 on 5936 degrees of freedom  
 Residual deviance: 8224.4 on 5933 degrees of freedom  
 AIC: 8232.4

Number of Fisher Scoring iterations: 3

```
# Pairwise comparison
pairwise.albo = glht(sr.albo, mcp(treatment="Tukey"))
summary(pairwise.albo)
```

## Simultaneous Tests for General Linear Hypotheses

Multiple Comparisons of Means: Tukey Contrasts

Fit: `glm(formula = "result ~ treatment", family = binomial, data = males.albo)`

Linear Hypotheses:

|                        | Estimate   | Std. Error | z value | Pr(> z ) |
|------------------------|------------|------------|---------|----------|
| Aal-M - BiA (WT) == 0  | -0.0912194 | 0.1135026  | -0.804  | 0.847    |
| Aal-m - BiA (WT) == 0  | -0.0910976 | 0.1169041  | -0.779  | 0.858    |
| Aal-CS - BiA (WT) == 0 | -0.0334861 | 0.1120801  | -0.299  | 0.990    |
| Aal-m - Aal-M == 0     | 0.0001218  | 0.0704883  | 0.002   | 1.000    |
| Aal-CS - Aal-M == 0    | 0.0577333  | 0.0621609  | 0.929   | 0.781    |
| Aal-CS - Aal-m == 0    | 0.0576115  | 0.0681741  | 0.845   | 0.826    |

(Adjusted p values reported -- single-step method)

Replication

# A tibble: 4 x 3

| Line       | N     | n     |
|------------|-------|-------|
| <fct>      | <int> | <int> |
| 1 BiA (WT) | 3     | 372   |
| 2 Aal-M    | 3     | 1912  |
| 3 Aal-m    | 3     | 1391  |
| 4 Aal-CS   | 3     | 2262  |

Model fit quality

```
check_model(sr.albo)
```

### Posterior Predictive Check

Model-predicted lines should resemble observed data

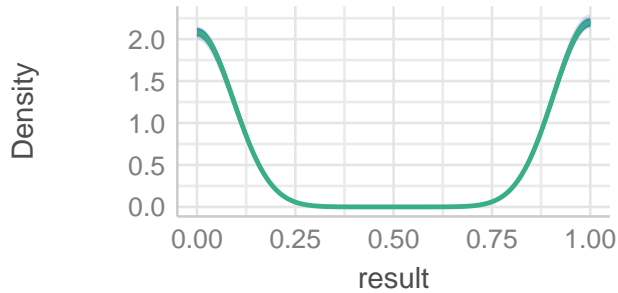

### Binned Residuals

Points should be within error bounds

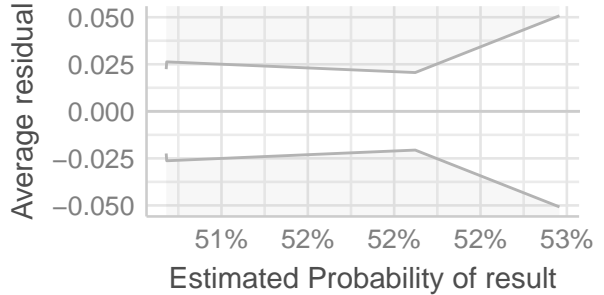

Model-predicted data — Observed data — Observed data

### Influential Observations

Points should be inside the contour lines

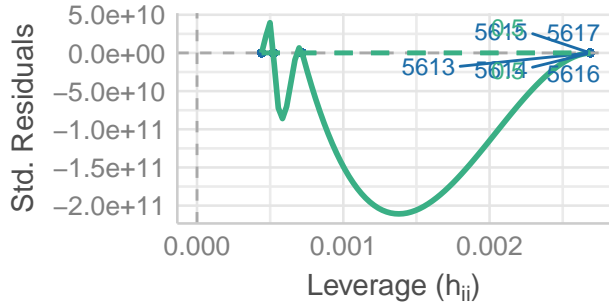

### Normality of Residuals

Dots should fall along the line

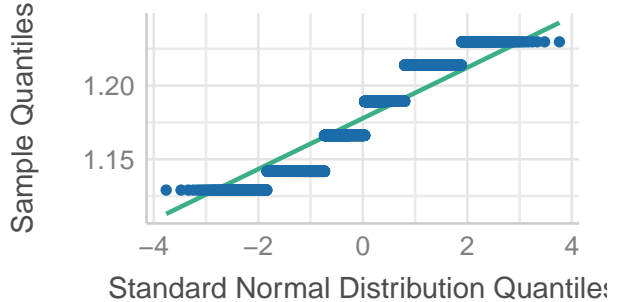

Plot .

```
# Extraction of the results
pred.sr.albo = ggpredict(model = sr.albo,
                        terms = c("treatment")) %>%
  data.frame()
pred.sr.albo$Species = "Ae. albopictus"

# plot
sr.plot.albo =
  ggplot(data = NULL) +
  geom_point(data = sr.alb.rep,
            aes(x = jitter(as.numeric(factor(Line)),
                          factor = .5),
                y = sr,
                color = Line),
            alpha = .6,
            size = 2) +
  geom_point(data = pred.sr.albo,
            aes(x = as.numeric(x),
                y = predicted * 100),
            size = 1.5, color = 'black') +
  geom_errorbar(data = pred.sr.albo,
               aes(x = as.numeric(x),
```

```

        ymin = conf.low* 100,
        ymax = conf.high* 100),
        width = 0.05,
        color = 'black') +
annotate(geom = 'text',
         x = summary.sr.alb$pos, y = 15,
         label = 'N = 3',
         size = 4) +
annotate(geom = 'text',
         x = summary.sr.alb$pos, y = 7,
         label = paste0('n = ', summary.sr.alb$value),
         size = 3.5) +
annotate(geom = 'line', x = 1:4, y = 90) +
annotate(geom = 'text', x = 2.5, y = 95,
         label = 'n.s.',
         size = 4) +
annotate(geom = 'line', x = 1:3, y = 80) +
annotate(geom = 'text', x = 2, y = 85,
         label = 'n.s.',
         size = 4) +
annotate(geom = 'line', x = 1:2, y = 70) +
annotate(geom = 'text', x = 1.5, y = 75,
         label = 'n.s.',
         size = 4) +
scale_x_continuous(breaks = 1:4,
                   labels = c("BiA (WT)",
                              "Aal-M",
                              "Aal-m",
                              "Aal-CS"),
                   limits = c(.5,4.5),
                   guide = guide_axis(angle = 30)) +
scale_y_continuous(breaks = c(0, 50, 100), limits = c(0, 100)) +
scale_color_manual(values = line.color.alb,
                   labels = names(line.color.alb)) +
labs(x = 'Line',
     y = 'Percentage of males (%)') +
theme_classic() +
theme(panel.background =
      element_rect(fill = species.bg[names(species.bg)=="Ae. albopictus"]),
      legend.position = 'none',
      axis.title.y = element_text(color = 'black',
                                   size = 12),
      axis.text.y = element_text(size = 10,
                                   hjust = 0, vjust = 0),
      axis.title.x = element_text(color = 'black',
                                   size = 12),
      axis.text.x = element_text(size = 10))
sr.plot.albo

```

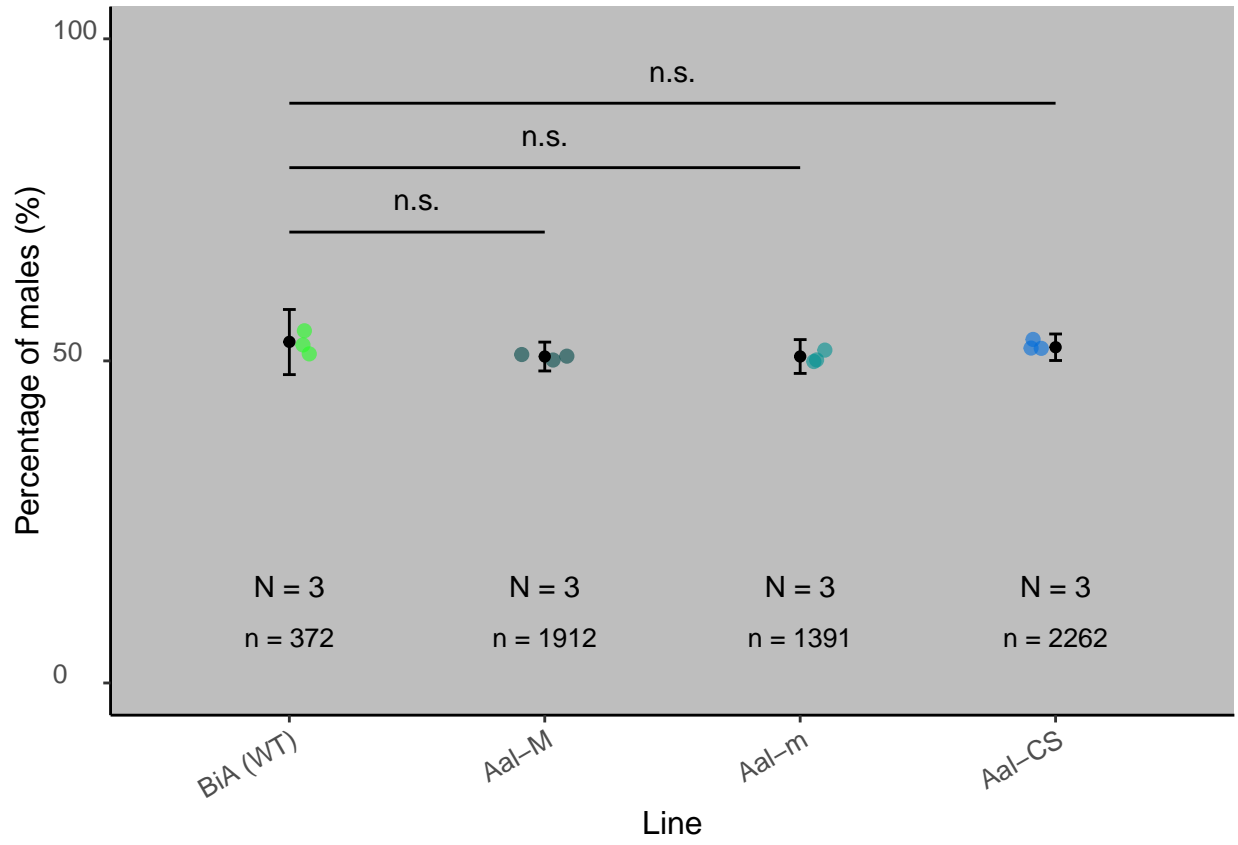

## Hatching rate

### Ae. aegypti

#### Data

```
# Data measurements
hr.aeg = read.table("data/H-rate_aeg.csv",
                    header = T, sep = ";")
hr.aeg$hr = hr.aeg$Larvae/hr.aeg$Eggs * 100
hr.aeg$Line = factor(hr.aeg$Line, levels = c("Bra (WT)",
                                             "Aaeg-M",
                                             "Aaeg-m",
                                             "Aaeg-CS"))

hr.aeg
```

|    | Replicate | Line     | Eggs | Larvae | Unhatched | hr       |
|----|-----------|----------|------|--------|-----------|----------|
| 1  | 1         | Bra (WT) | 220  | 140    | 80        | 63.63636 |
| 2  | 2         | Bra (WT) | 235  | 141    | 94        | 60.00000 |
| 3  | 3         | Bra (WT) | 272  | 166    | 106       | 61.02941 |
| 4  | 1         | Aaeg-M   | 435  | 259    | 176       | 59.54023 |
| 5  | 2         | Aaeg-M   | 297  | 157    | 140       | 52.86195 |
| 6  | 3         | Aaeg-M   | 291  | 172    | 119       | 59.10653 |
| 7  | 1         | Aaeg-m   | 392  | 315    | 77        | 80.35714 |
| 8  | 2         | Aaeg-m   | 295  | 242    | 53        | 82.03390 |
| 9  | 3         | Aaeg-m   | 491  | 398    | 93        | 81.05906 |
| 10 | 1         | Aaeg-CS  | 515  | 405    | 110       | 78.64078 |
| 11 | 2         | Aaeg-CS  | 335  | 283    | 52        | 84.47761 |
| 12 | 3         | Aaeg-CS  | 465  | 346    | 119       | 74.40860 |

```
# Build binomial dataset
hatch.aegypti =
  rbind(
    data.frame(replicate = hr.aeg[1,1],
               treatment = hr.aeg[1,2],
               result = rep(0, hr.aeg[1,5])),
    data.frame(replicate = hr.aeg[1,1],
               treatment = hr.aeg[1,2],
               result = rep(1, hr.aeg[1,4])))

for(i in 2:nrow(hr.aeg)){
  hatch.aegypti =
    rbind(
      hatch.aegypti,
      data.frame(replicate = hr.aeg[i,1],
                 treatment = hr.aeg[i,2],
                 result = rep(0, hr.aeg[i,5])),
      data.frame(replicate = hr.aeg[i,1],
                 treatment = hr.aeg[i,2],
                 result = rep(1, hr.aeg[i,4])))
}

}
```

```

hatch.aegypti$treatment=factor(hatch.aegypti$treatment,
                                levels = c("Bra (WT)", "Aeg-M", "Aeg-m", "Aeg-CS"))
hatch.aegypti$Species = 'Ae. aegypti'

summary.hatch.aeg = hatch.aegypti %>%
  group_by(treatment) %>%
  dplyr::summarise(value = n()) %>%
  data.frame() %>%
  mutate(pos = c(1, 2, 3, 4))

head(hatch.aegypti)

```

```

  replicate treatment result Species
1          1 Bra (WT)      0 Ae. aegypti
2          1 Bra (WT)      0 Ae. aegypti
3          1 Bra (WT)      0 Ae. aegypti
4          1 Bra (WT)      0 Ae. aegypti
5          1 Bra (WT)      0 Ae. aegypti
6          1 Bra (WT)      0 Ae. aegypti

```

## Model

```

# Generalized linear model with Bernoulli distribution
hatch.aegypti_stat = glm(formula = 'result ~ treatment',
                          family = binomial,
                          data = hatch.aegypti)
summary(hatch.aegypti_stat)

```

Call:

```
glm(formula = "result ~ treatment", family = binomial, data = hatch.aegypti)
```

Deviance Residuals:

```

      Min       1Q   Median       3Q      Max
-1.8245 -1.3078  0.6479  0.6934  1.0524

```

Coefficients:

```

              Estimate Std. Error z value Pr(>|z|)
(Intercept)    0.46777    0.07621   6.138 8.38e-10 ***
treatmentAeg-M -0.16639    0.09904  -1.680  0.0929 .
treatmentAeg-m  0.98677    0.10649   9.266 < 2e-16 ***
treatmentAeg-CS 0.83507    0.10166   8.214 < 2e-16 ***
---

```

```
Signif. codes:  0 '***' 0.001 '**' 0.01 '*' 0.05 '.' 0.1 ' ' 1
```

(Dispersion parameter for binomial family taken to be 1)

```

Null deviance: 5089.2 on 4242 degrees of freedom
Residual deviance: 4871.9 on 4239 degrees of freedom
AIC: 4879.9

```

Number of Fisher Scoring iterations: 4



```
# Pairwise comparison
pairwise.h.aeg = glht(hatch.aegypti_stat,
                      mcp(treatment="Tukey"))

h.aeg<-summary(pairwise.h.aeg)

h.aeg
```

### Simultaneous Tests for General Linear Hypotheses

Multiple Comparisons of Means: Tukey Contrasts

Fit: glm(formula = "result ~ treatment", family = binomial, data = hatch.aegypti)

Linear Hypotheses:

|                         | Estimate | Std. Error | z value | Pr(> z )   |
|-------------------------|----------|------------|---------|------------|
| Aaeg-M - Bra (WT) == 0  | -0.16639 | 0.09904    | -1.680  | 0.334      |
| Aaeg-m - Bra (WT) == 0  | 0.98677  | 0.10649    | 9.266   | <1e-04 *** |
| Aaeg-CS - Bra (WT) == 0 | 0.83507  | 0.10166    | 8.214   | <1e-04 *** |
| Aaeg-m - Aaeg-M == 0    | 1.15316  | 0.09763    | 11.812  | <1e-04 *** |
| Aaeg-CS - Aaeg-M == 0   | 1.00145  | 0.09233    | 10.846  | <1e-04 *** |
| Aaeg-CS - Aaeg-m == 0   | -0.15170 | 0.10029    | -1.513  | 0.429      |

---  
 Signif. codes: 0 '\*\*\*' 0.001 '\*\*' 0.01 '\*' 0.05 '.' 0.1 ' ' 1  
 (Adjusted p values reported -- single-step method)

Replication

```
# A tibble: 4 x 3
  Treatment      N      n
  <fct>      <int> <int>
1 Bra (WT)      3     727
2 Aaeg-M        3    1023
3 Aaeg-m        3    1178
4 Aaeg-CS       3    1315
```

Model fit quality

```
check_model(hatch.aegypti_stat)
```

### Posterior Predictive Check

Model-predicted lines should resemble observed data

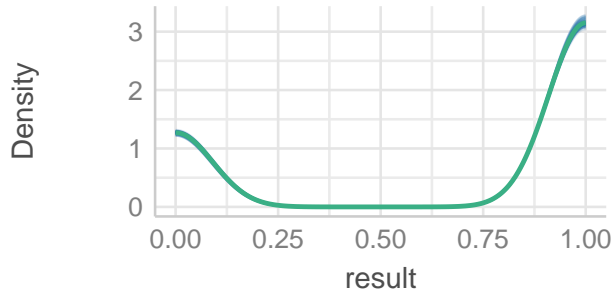

### Binned Residuals

Points should be within error bounds

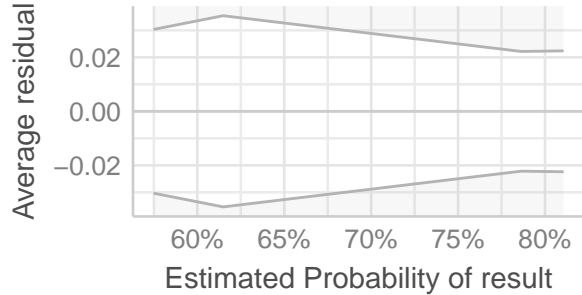

— predicted data — Observed data — Observed data

### Influential Observations

Points should be inside the contour lines

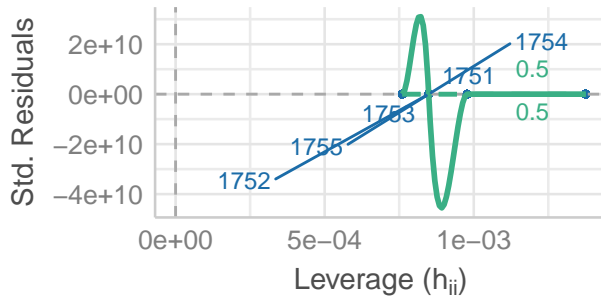

### Normality of Residuals

Dots should fall along the line

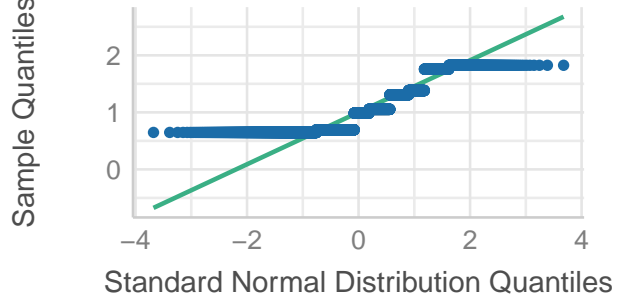

Plot .

```
# Extraction of the results
pred.aeg = data.frame(ggpredict(model = hatch.aegypti_stat,
                               terms = c("treatment")))

pred.aeg$x = factor(pred.aeg$x,
                   levels = c("Bra (WT)",
                              "Aaeg-M",
                              "Aaeg-m",
                              "Aaeg-CS"))

pred.aeg$Species = 'Ae. aegypti'

# plot
hr.plot.aeg =
  ggplot(data = NULL) +
  geom_point(data = hr.aeg,
            aes(x = jitter(as.numeric(Line),
                          factor = 1),
                y = hr,
                color = Line),
            size = 2, alpha = .6) +
  geom_point(data = pred.aeg,
            aes(x = as.numeric(x),
```

```

        y = predicted * 100),
        size = 1.5 ,
        color = 'black') +
geom_errorbar(data = pred.aeg,
              aes(x = as.numeric(x),
                 ymin = conf.low* 100,
                 ymax = conf.high* 100),
              width = 0.05,
              color = 'black') +
annotate(geom = 'text',
         x = summary.hatch.aeg$pos, y = 15,
         label = 'N = 3',
         size = 4) +
annotate(geom = 'text',
         x = summary.hatch.aeg$pos, y = 7,
         label = paste0('n = ', summary.hatch.aeg$value),
         size = 3.5) +
annotate(geom = 'line', x = 1:4, y = 100) +
annotate(geom = 'text', x = 2.5, y = 105,
         label = '***',
         size = 4) +
annotate(geom = 'line', x = 1:3, y = 90) +
annotate(geom = 'text', x = 2, y = 95,
         label = '***',
         size = 4) +
annotate(geom = 'line', x = 1:2, y = 80) +
annotate(geom = 'text', x = 1.5, y = 85,
         label = 'n.s.',
         size = 4) +
scale_x_continuous(breaks = 1:4,
                  labels = c("Bra (WT)",
                             "Aaeg-M",
                             "Aaeg-m",
                             "Aaeg-CS"),
                  limits = c(.5,4.5),
                  guide = guide_axis(angle = 30)) +
scale_y_continuous(breaks = c(0, 25, 50, 75, 100),
                  limits = c(0, 100)) +
scale_color_manual(values = line.color.aeg,
                  labels = names(line.color.aeg)) +
labs(x = 'Line',
     y = 'Hatched eggs (%)') +
theme_classic() +
theme(legend.position = 'none',
      axis.title.y = element_text(color = 'black',
                                   size = 12),
      axis.text.y = element_text(size = 10,
                                  hjust = 0, vjust = 0),
      axis.title.x = element_text(color = 'black',
                                   size = 12),
      axis.text.x = element_text(size = 10))

```

hr.plot.aeg

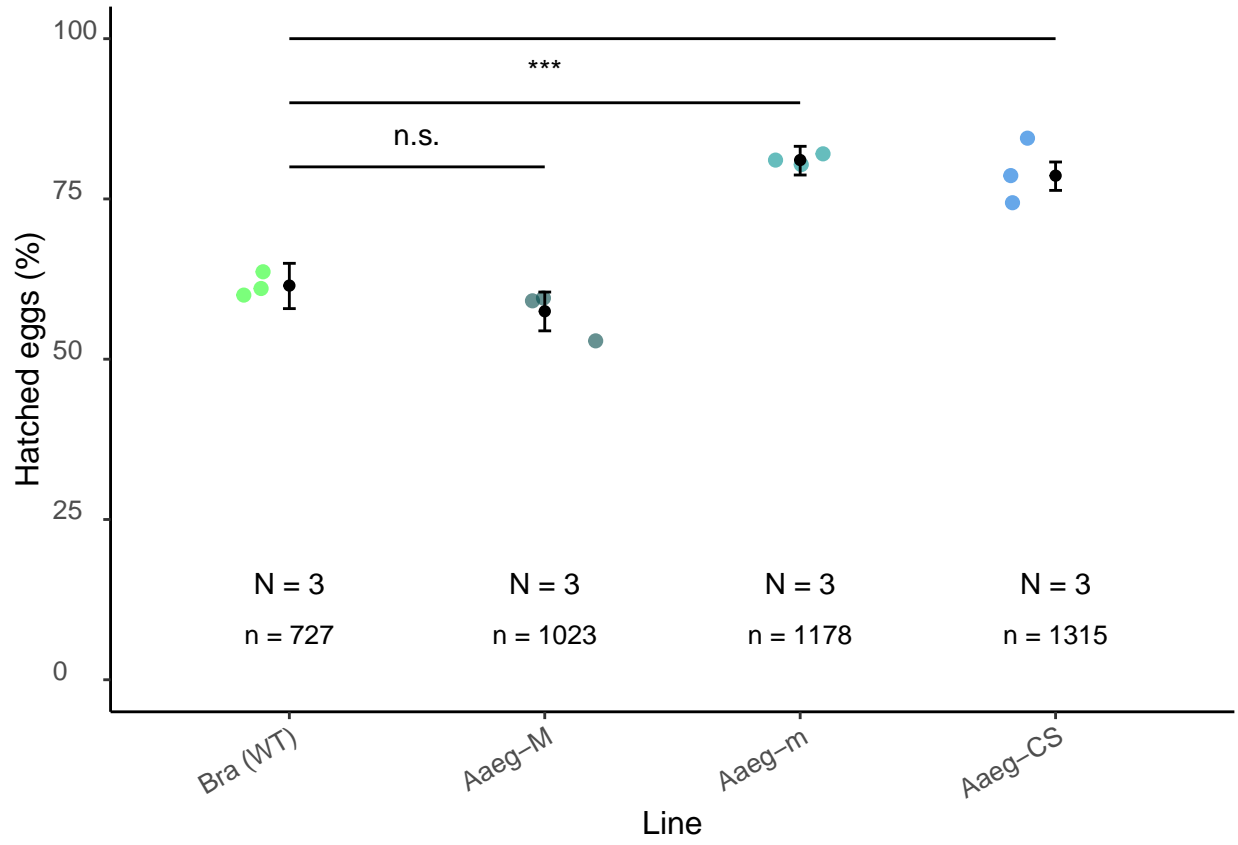

## Ae. albopictus

### Data

```
# Data measurements
hr.alb = read.table("data/H-rate_albo.csv",
                    header = T, sep = ";")
hr.alb$hr = hr.alb$Larvae/hr.alb$Eggs * 100
hr.alb$Line = factor(hr.alb$Line,
                     levels = c("BiA (WT)",
                                "Aal-M",
                                "Aal-m",
                                "Aal-CS"))
```

hr.alb

|    | Replicate | Line     | Eggs | Larvae | Unhatched | hr       |
|----|-----------|----------|------|--------|-----------|----------|
| 1  | 1         | BiA (WT) | 965  | 555    | 410       | 57.51295 |
| 2  | 2         | BiA (WT) | 750  | 461    | 289       | 61.46667 |
| 3  | 3         | BiA (WT) | 1025 | 539    | 486       | 52.58537 |
| 4  | 4         | BiA (WT) | 730  | 326    | 404       | 44.65753 |
| 5  | 5         | BiA (WT) | 756  | 347    | 409       | 45.89947 |
| 6  | 1         | Aal-M    | 927  | 632    | 295       | 68.17691 |
| 7  | 2         | Aal-M    | 887  | 453    | 434       | 51.07103 |
| 8  | 3         | Aal-M    | 863  | 490    | 373       | 56.77868 |
| 9  | 4         | Aal-M    | 1473 | 783    | 690       | 53.15682 |
| 10 | 5         | Aal-M    | 534  | 285    | 249       | 53.37079 |
| 11 | 1         | Aal-m    | 221  | 103    | 118       | 46.60633 |
| 12 | 2         | Aal-m    | 338  | 147    | 191       | 43.49112 |
| 13 | 3         | Aal-m    | 587  | 365    | 222       | 62.18058 |
| 14 | 4         | Aal-m    | 331  | 156    | 175       | 47.12991 |
| 15 | 5         | Aal-m    | 225  | 114    | 111       | 50.66667 |
| 16 | 1         | Aal-CS   | 1594 | 897    | 697       | 56.27353 |
| 17 | 2         | Aal-CS   | 1633 | 849    | 784       | 51.99020 |
| 18 | 3         | Aal-CS   | 2020 | 1325   | 695       | 65.59406 |
| 19 | 4         | Aal-CS   | 1663 | 873    | 790       | 52.49549 |
| 20 | 5         | Aal-CS   | 1250 | 557    | 693       | 44.56000 |

```
# Build binomial dataset
hatch.albo =
  rbind(
    data.frame(replicate = hr.alb[1,1],
               treatment = hr.alb[1,2],
               result = rep(0, hr.alb[1,5])),
    data.frame(replicate = hr.alb[1,1],
               treatment = hr.alb[1,2],
               result = rep(1, hr.alb[1,4])))

for(i in 2:nrow(hr.alb)){
  hatch.albo =
    rbind(
      hatch.albo,
      data.frame(replicate = hr.alb[i,1],
                 treatment = hr.alb[i,2],
```

```

        result = rep(0, hr.alb[i,5]),
data.frame(replicate = hr.alb[i,1],
           treatment = hr.alb[i,2],
           result = rep(1, hr.alb[i,4]))
)
}
hatch.albo$treatment = factor(hatch.albo$treatment,
                             levels = c("BiA (WT)", "Aal-M", "Aal-m", "Aal-CS"))
hatch.albo$Species = 'Ae. albopictus'

summary.hatch.albo = hatch.albo %>%
  group_by(treatment) %>%
  dplyr::summarise(value = n()) %>%
  data.frame() %>%
  mutate(pos = c(1, 2, 3, 4))

head(hatch.albo)

```

```

  replicate treatment result      Species
1         1 BiA (WT)      0 Ae. albopictus
2         1 BiA (WT)      0 Ae. albopictus
3         1 BiA (WT)      0 Ae. albopictus
4         1 BiA (WT)      0 Ae. albopictus
5         1 BiA (WT)      0 Ae. albopictus
6         1 BiA (WT)      0 Ae. albopictus

```

## Model .

```

# Generalized linear model with Bernoulli distribution
hatch.albo_stat = glm(formula = 'result ~ treatment',
                     family = binomial,
                     data = hatch.albo)
summary(hatch.albo_stat)

```

Call:

```
glm(formula = "result ~ treatment", family = binomial, data = hatch.albo)
```

Deviance Residuals:

```

   Min       1Q   Median       3Q      Max
-1.289 -1.267  1.070  1.091  1.144

```

Coefficients:

```

            Estimate Std. Error z value Pr(>|z|)
(Intercept)  0.10896   0.03081   3.536 0.000406 ***
treatmentAal-M  0.14952   0.04263   3.507 0.000453 ***
treatmentAal-m -0.02901   0.05747  -0.505 0.613746
treatmentAal-CS  0.09815   0.03801   2.582 0.009816 **

```

---

```
Signif. codes:  0 '***' 0.001 '**' 0.01 '*' 0.05 '.' 0.1 ' ' 1
```

(Dispersion parameter for binomial family taken to be 1)

Null deviance: 25862 on 18771 degrees of freedom  
Residual deviance: 25844 on 18768 degrees of freedom  
AIC: 25852

Number of Fisher Scoring iterations: 3

```
# Pairwise comparison
pairwise.h.alb = glht(hatch.albo_stat,
                      mcp(treatment="Tukey"))

h.albo <- summary(pairwise.h.alb)

h.albo
```

### Simultaneous Tests for General Linear Hypotheses

Multiple Comparisons of Means: Tukey Contrasts

Fit: glm(formula = "result ~ treatment", family = binomial, data = hatch.albo)

Linear Hypotheses:

|                        | Estimate | Std. Error | z value | Pr(> z ) |    |
|------------------------|----------|------------|---------|----------|----|
| Aal-M - BiA (WT) == 0  | 0.14952  | 0.04263    | 3.507   | 0.00232  | ** |
| Aal-m - BiA (WT) == 0  | -0.02901 | 0.05747    | -0.505  | 0.95667  |    |
| Aal-CS - BiA (WT) == 0 | 0.09815  | 0.03801    | 2.582   | 0.04630  | *  |
| Aal-m - Aal-M == 0     | -0.17853 | 0.05676    | -3.145  | 0.00834  | ** |
| Aal-CS - Aal-M == 0    | -0.05137 | 0.03693    | -1.391  | 0.49667  |    |
| Aal-CS - Aal-m == 0    | 0.12716  | 0.05338    | 2.382   | 0.07725  | .  |

---

Signif. codes: 0 '\*\*\*' 0.001 '\*\*' 0.01 '\*' 0.05 '.' 0.1 ' ' 1  
(Adjusted p values reported -- single-step method)

Replication

```
# A tibble: 4 x 3
  Treatment    N     n
  <fct>      <int> <int>
1 BiA (WT)     5  4226
2 Aal-M        5  4684
3 Aal-m        5  1702
4 Aal-CS       5  8160
```

Model fit quality

```
check_model(hatch.albo_stat)
```

### Posterior Predictive Check

Model-predicted lines should resemble observed data

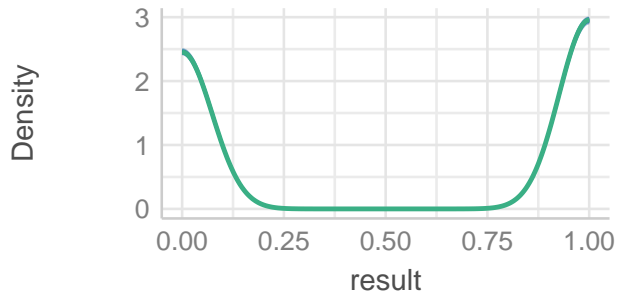

### Binned Residuals

Points should be within error bounds

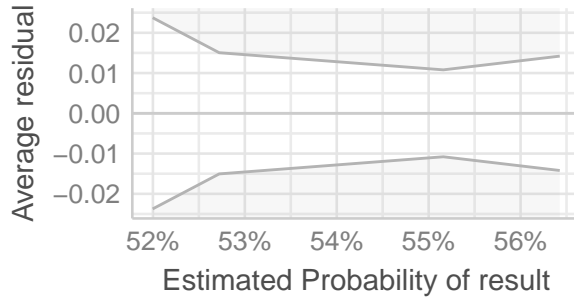

— Model-predicted data — Observed data — Observed data

### Influential Observations

Points should be inside the contour lines

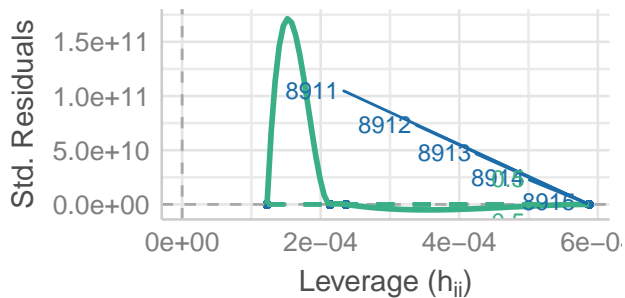

### Normality of Residuals

Dots should fall along the line

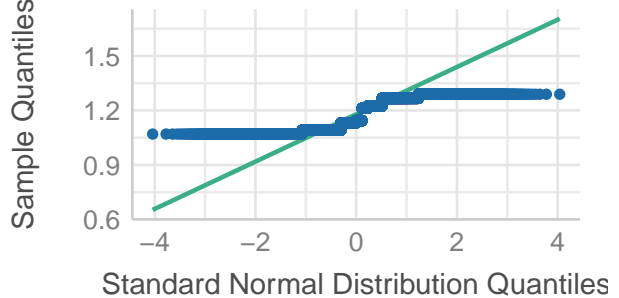

Plot .

```
# Extraction of the results
pred.alb = data.frame(ggpredict(model = hatch.albo_stat,
                               terms = c("treatment")))

pred.alb$x = as.character(pred.alb$x)
pred.alb$x = factor(pred.alb$x,
                    levels = c("BiA (WT)",
                               "Aal-M",
                               "Aal-m",
                               "Aal-CS"))

pred.alb$Species = 'Ae. albopictus'
pred.alb$group = as.factor(2)

# plot
hr.plot.alb =
  ggplot(data = NULL) +
  geom_point(data = hr.alb,
            aes(x = jitter(as.numeric(Line),
                          factor = 1),
                y = hr, color = Line),
            size = 2, alpha = .6) +
  geom_point(data = pred.alb,
            aes(x = as.numeric(x),
                y = predicted * 100),
```



```

      size = 1.5 , color = 'black') +
geom_errorbar(data = pred.alb,
  aes(x = as.numeric(x),
      ymin = conf.low* 100,
      ymax = conf.high* 100),
  width = 0.05,
  color = 'black') +
annotate(geom = 'text',
  x = summary.hatch.albo$pos, y = 15,
  label = 'N = 5',
  size = 4) +
annotate(geom = 'text',
  x = summary.hatch.albo$pos, y = 7,
  label = paste0('n = ', summary.hatch.albo$value),
  size = 3.5) +
annotate(geom = 'line', x = 1:4, y = 100) +
annotate(geom = 'text', x = 2.5, y = 105,
  label = '*',
  size = 4) +
annotate(geom = 'line', x = 1:3, y = 90) +
annotate(geom = 'text', x = 2, y = 95,
  label = 'n.s.',
  size = 4) +
annotate(geom = 'line', x = 1:2, y = 80) +
annotate(geom = 'text', x = 1.5, y = 85,
  label = '**',
  size = 4) +
scale_x_continuous(breaks = 1:4,
  labels = c("BiA (WT)",
            "Aal-M",
            "Aal-m",
            "Aal-CS"),
  limits = c(.5,4.5), guide = guide_axis(angle = 30)) +
scale_y_continuous(breaks = c(0, 25, 50, 75, 100), limits = c(0, 100)) +
scale_color_manual(values = line.color.alb,
  labels = names(line.color.alb)) +
labs(x = 'Line',
  y = 'Hatched eggs (%)') +
theme_classic() +
theme(panel.background =
  element_rect(fill = species.bg[names(species.bg)=="Ae. albopictus"]),
  legend.position = 'none',
  axis.title.y = element_text(color = 'black',
    size = 12),
  axis.text.y = element_text(size = 10,
    hjust = 0, vjust = 0),
  axis.title.x = element_text(color = 'black',
    size = 12),
  axis.text.x = element_text(size = 10))

```

hr.plot.alb

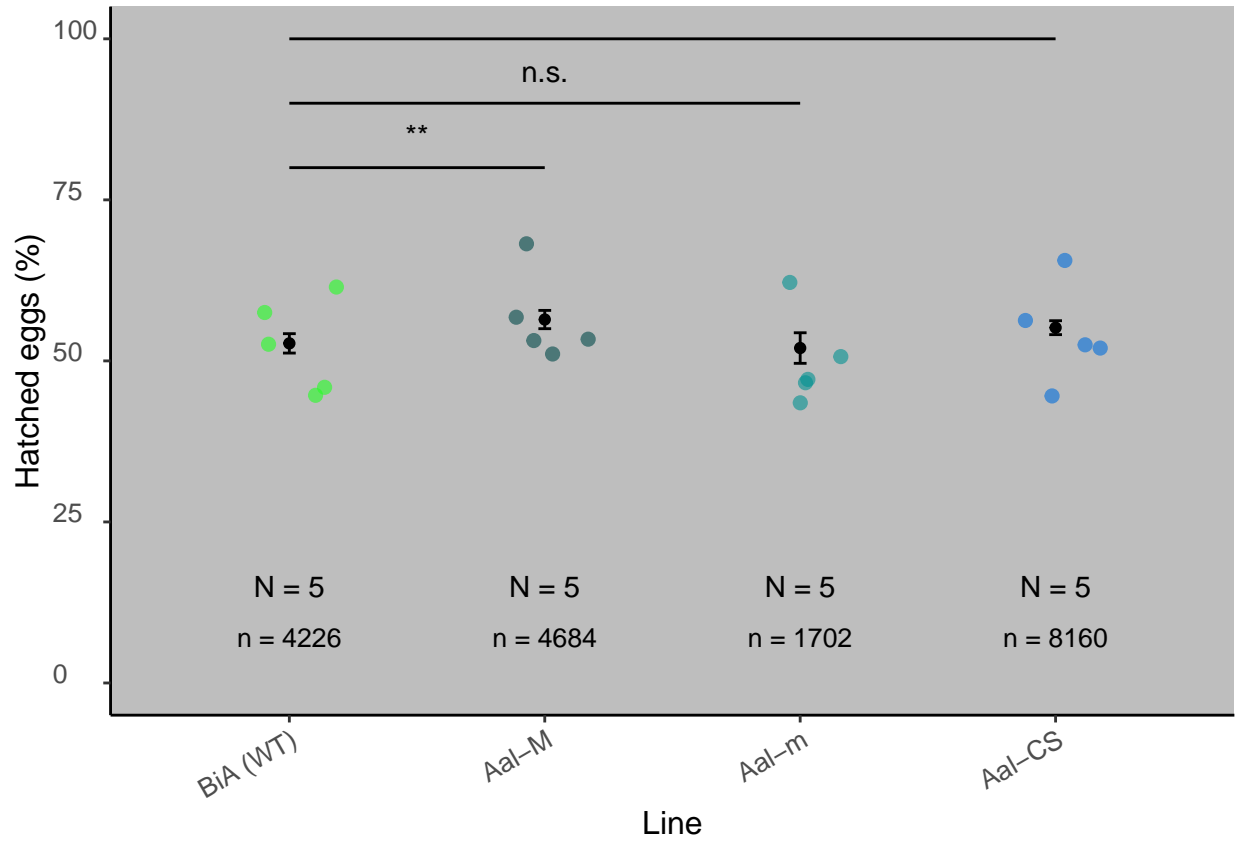

## Fecundity

### Ae. aegypti

#### Data

```
fecund_aeg = read.table("data/Fecundity_aeg.csv",
                        header=TRUE, sep=";")

fecund_aeg = fecund_aeg %>%
  filter(Eggs != "NA")

fecund_aeg$Line = factor(fecund_aeg$Line,
                        levels = c('Bra (WT)', 'Aaeg-M', 'Aaeg-m', 'Aaeg-CS'))

fecund_aeg$Species = "Ae. aegypti"

fecund_aeg
```

|    | Line     | Well | Eggs | Species     |
|----|----------|------|------|-------------|
| 1  | Bra (WT) | A1   | 33   | Ae. aegypti |
| 2  | Bra (WT) | A2   | 0    | Ae. aegypti |
| 3  | Bra (WT) | A3   | 0    | Ae. aegypti |
| 4  | Bra (WT) | A4   | 53   | Ae. aegypti |
| 5  | Bra (WT) | A5   | 96   | Ae. aegypti |
| 6  | Bra (WT) | A6   | 7    | Ae. aegypti |
| 7  | Bra (WT) | B1   | 7    | Ae. aegypti |
| 8  | Bra (WT) | B2   | 0    | Ae. aegypti |
| 9  | Bra (WT) | B3   | 44   | Ae. aegypti |
| 10 | Bra (WT) | B4   | 94   | Ae. aegypti |
| 11 | Bra (WT) | B5   | 71   | Ae. aegypti |
| 12 | Bra (WT) | B6   | 73   | Ae. aegypti |
| 13 | Bra (WT) | C1   | 0    | Ae. aegypti |
| 14 | Bra (WT) | C2   | 5    | Ae. aegypti |
| 15 | Bra (WT) | C3   | 0    | Ae. aegypti |
| 16 | Bra (WT) | C4   | 7    | Ae. aegypti |
| 17 | Bra (WT) | C5   | 0    | Ae. aegypti |
| 18 | Bra (WT) | C6   | 57   | Ae. aegypti |
| 19 | Bra (WT) | D1   | 13   | Ae. aegypti |
| 20 | Bra (WT) | D2   | 2    | Ae. aegypti |
| 21 | Bra (WT) | D3   | 2    | Ae. aegypti |
| 22 | Bra (WT) | D4   | 67   | Ae. aegypti |
| 23 | Bra (WT) | D5   | 0    | Ae. aegypti |
| 24 | Bra (WT) | D6   | 4    | Ae. aegypti |
| 25 | Aaeg-M   | A1   | 9    | Ae. aegypti |
| 26 | Aaeg-M   | A2   | 0    | Ae. aegypti |
| 27 | Aaeg-M   | A3   | 50   | Ae. aegypti |
| 28 | Aaeg-M   | A4   | 0    | Ae. aegypti |
| 29 | Aaeg-M   | A5   | 34   | Ae. aegypti |
| 30 | Aaeg-M   | A6   | 0    | Ae. aegypti |
| 31 | Aaeg-M   | B1   | 58   | Ae. aegypti |
| 32 | Aaeg-M   | B2   | 57   | Ae. aegypti |
| 33 | Aaeg-M   | B3   | 16   | Ae. aegypti |
| 34 | Aaeg-M   | B4   | 0    | Ae. aegypti |

|    |         |    |     |             |
|----|---------|----|-----|-------------|
| 35 | Aaeg-M  | B5 | 66  | Ae. aegypti |
| 36 | Aaeg-M  | B6 | 9   | Ae. aegypti |
| 37 | Aaeg-M  | C1 | 50  | Ae. aegypti |
| 38 | Aaeg-M  | C2 | 2   | Ae. aegypti |
| 39 | Aaeg-M  | C3 | 69  | Ae. aegypti |
| 40 | Aaeg-M  | C4 | 20  | Ae. aegypti |
| 41 | Aaeg-M  | C5 | 0   | Ae. aegypti |
| 42 | Aaeg-M  | C6 | 8   | Ae. aegypti |
| 43 | Aaeg-M  | D1 | 77  | Ae. aegypti |
| 44 | Aaeg-M  | D2 | 2   | Ae. aegypti |
| 45 | Aaeg-M  | D3 | 5   | Ae. aegypti |
| 46 | Aaeg-M  | D4 | 3   | Ae. aegypti |
| 47 | Aaeg-M  | D5 | 17  | Ae. aegypti |
| 48 | Aaeg-M  | D6 | 0   | Ae. aegypti |
| 49 | Aaeg-CS | A1 | 71  | Ae. aegypti |
| 50 | Aaeg-CS | A2 | 1   | Ae. aegypti |
| 51 | Aaeg-CS | A3 | 62  | Ae. aegypti |
| 52 | Aaeg-CS | A4 | 87  | Ae. aegypti |
| 53 | Aaeg-CS | A5 | 83  | Ae. aegypti |
| 54 | Aaeg-CS | A6 | 48  | Ae. aegypti |
| 55 | Aaeg-CS | B1 | 62  | Ae. aegypti |
| 56 | Aaeg-CS | B2 | 72  | Ae. aegypti |
| 57 | Aaeg-CS | B3 | 48  | Ae. aegypti |
| 58 | Aaeg-CS | B4 | 0   | Ae. aegypti |
| 59 | Aaeg-CS | B5 | 129 | Ae. aegypti |
| 60 | Aaeg-CS | B6 | 0   | Ae. aegypti |
| 61 | Aaeg-CS | C1 | 0   | Ae. aegypti |
| 62 | Aaeg-CS | C2 | 59  | Ae. aegypti |
| 63 | Aaeg-CS | C3 | 57  | Ae. aegypti |
| 64 | Aaeg-CS | C4 | 42  | Ae. aegypti |
| 65 | Aaeg-CS | C5 | 48  | Ae. aegypti |
| 66 | Aaeg-CS | C6 | 95  | Ae. aegypti |
| 67 | Aaeg-CS | D3 | 0   | Ae. aegypti |
| 68 | Aaeg-CS | D4 | 70  | Ae. aegypti |
| 69 | Aaeg-CS | D5 | 114 | Ae. aegypti |
| 70 | Aaeg-CS | D6 | 72  | Ae. aegypti |
| 71 | Aaeg-m  | A1 | 44  | Ae. aegypti |
| 72 | Aaeg-m  | A2 | 48  | Ae. aegypti |
| 73 | Aaeg-m  | A3 | 73  | Ae. aegypti |
| 74 | Aaeg-m  | A4 | 15  | Ae. aegypti |
| 75 | Aaeg-m  | A5 | 1   | Ae. aegypti |
| 76 | Aaeg-m  | A6 | 0   | Ae. aegypti |
| 77 | Aaeg-m  | B1 | 0   | Ae. aegypti |
| 78 | Aaeg-m  | B2 | 52  | Ae. aegypti |
| 79 | Aaeg-m  | B3 | 69  | Ae. aegypti |
| 80 | Aaeg-m  | B4 | 35  | Ae. aegypti |
| 81 | Aaeg-m  | B5 | 3   | Ae. aegypti |
| 82 | Aaeg-m  | B6 | 6   | Ae. aegypti |
| 83 | Aaeg-m  | C1 | 87  | Ae. aegypti |
| 84 | Aaeg-m  | C2 | 11  | Ae. aegypti |
| 85 | Aaeg-m  | C3 | 57  | Ae. aegypti |
| 86 | Aaeg-m  | C4 | 55  | Ae. aegypti |
| 87 | Aaeg-m  | C5 | 32  | Ae. aegypti |
| 88 | Aaeg-m  | C6 | 4   | Ae. aegypti |

```
89  Aaeg-m  D1    0 Ae. aegypti
90  Aaeg-m  D2    1 Ae. aegypti
```

```
fecund.summary.aeg = fecund_aeg %>%
  group_by(Line) %>%
  dplyr::summarise(value = n()) %>%
  data.frame() %>%
  mutate(pos = c(1, 2, 3, 4))
```

**Model** . 4 models were tested and compared for analyzing fecundity data: a Generalized Linear Model with Poisson distribution (mod0), a Negative Binomial Generalized Linear Model (mod), a Hurdle model with negative binomial distribution (mod1) and a Hurdle model with Poisson distribution (mod2). These models were compared using the “compare\_performance” function of package “performance”. From this comparison of model fits, the Hurdle model with negative binomial distribution (mod1) was chosen.

```
# Generalized Linear Model with Poisson distribution (mod0)
mod0 = glm(formula = 'Eggs ~ Line',
           data = fecund_aeg, family = 'poisson')

check_distribution(mod0)
```

```
# Distribution of Model Family
```

```
Predicted Distribution of Residuals
```

| Distribution | Probability |
|--------------|-------------|
| normal       | 34%         |
| tweedie      | 28%         |
| cauchy       | 16%         |

```
Predicted Distribution of Response
```

|               | Distribution  | Probability |
|---------------|---------------|-------------|
| neg. binomial | (zero-infl.)  | 94%         |
|               | beta-binomial | 3%          |
|               | tweedie       | 3%          |

```
check_homogeneity(mod0)
```

OK: There is not clear evidence for different variances across groups (Bartlett Test,  $p = 0.433$ ).

```
check_zeroinflation(mod0)
```

```
# Check for zero-inflation
```

```
Observed zeros: 20
Predicted zeros: 0
Ratio: 0.00
```

```
check_singularity(mod0)
```

```
[1] FALSE
```

```
# Negative Binomial Generalized Linear Model (mod)
mod = MASS::glm.nb(formula = 'Eggs ~ Line',
                   data = fecund_aeg)

# Hurdle model with negative binomial distribution (mod1)
mod1 = pscl::hurdle(Eggs ~ Line,
                   data = fecund_aeg,
                   dist = 'negbin')

# Hurdle model with negative binomial distribution (mod1)
mod2 = pscl::hurdle(Eggs ~ Line,
                   data = fecund_aeg,
                   dist = 'poisson')

# Performance comparison
performance::compare_performance(mod0, mod, mod1, mod2)
```

```
# Comparison of Model Performance Indices
```

| Name | Model  | AIC (weights)  | AICc (weights) | BIC (weights)  | RMSE   | Sigma  | Score_log | Score_ |
|------|--------|----------------|----------------|----------------|--------|--------|-----------|--------|
| mod0 | glm    | 3463.7 (<.001) | 3464.2 (<.001) | 3473.7 (<.001) | 31.040 | 6.007  | -19.198   |        |
| mod  | negbin | 776.5 (0.020)  | 777.2 (0.043)  | 789.0 (0.756)  | 31.040 | 1.109  | -4.788    |        |
| mod1 | hurdle | 768.8 (0.980)  | 771.0 (0.957)  | 791.3 (0.244)  | 31.040 | 32.719 | -5.145    |        |
| mod2 | hurdle | 2127.5 (<.001) | 2129.3 (<.001) | 2147.5 (<.001) | 31.040 | 32.519 | -13.424   |        |

```
summary(mod1)
```

```
Call:
```

```
pscl::hurdle(formula = Eggs ~ Line, data = fecund_aeg, dist = "negbin")
```

```
Pearson residuals:
```

| Min     | 1Q      | Median  | 3Q     | Max    |
|---------|---------|---------|--------|--------|
| -0.8767 | -0.7530 | -0.2053 | 0.5867 | 1.9791 |

```
Count model coefficients (truncated negbin with log link):
```

|             | Estimate | Std. Error | z value | Pr(> z )   |
|-------------|----------|------------|---------|------------|
| (Intercept) | 3.59467  | 0.24406    | 14.728  | <2e-16 *** |
| LineAaeg-M  | -0.20305 | 0.34025    | -0.597  | 0.5507     |
| LineAaeg-m  | -0.07031 | 0.34473    | -0.204  | 0.8384     |
| LineAaeg-CS | 0.60761  | 0.33873    | 1.794   | 0.0728 .   |
| Log(theta)  | 0.01902  | 0.20161    | 0.094   | 0.9248     |

```
Zero hurdle model coefficients (binomial with logit link):
```

|             | Estimate | Std. Error | z value | Pr(> z ) |
|-------------|----------|------------|---------|----------|
| (Intercept) | 0.8873   | 0.4491     | 1.976   | 0.0482 * |
| LineAaeg-M  | 0.2113   | 0.6511     | 0.325   | 0.7455   |

```
LineAaeg-m    0.8473    0.7706    1.100    0.2715
LineAaeg-CS   0.6168    0.7122    0.866    0.3865
---
Signif. codes:  0 '***' 0.001 '**' 0.01 '*' 0.05 '.' 0.1 ' ' 1
```

```
Theta: count = 1.0192
Number of iterations in BFGS optimization: 11
Log-likelihood: -375.4 on 9 Df
```

```
emmeans::emmeans(mod1, specs = 'Line', mode = 'response')
```

| Line     | emmean | SE    | df | lower.CL | upper.CL |
|----------|--------|-------|----|----------|----------|
| Bra (WT) | 26.5   | 7.18  | 81 | 12.2     | 40.7     |
| Aaeg-M   | 23.0   | 5.96  | 81 | 11.2     | 34.8     |
| Aaeg-m   | 29.6   | 7.57  | 81 | 14.6     | 44.7     |
| Aaeg-CS  | 55.5   | 14.03 | 81 | 27.5     | 83.4     |

Confidence level used: 0.95

```
# Pairwise comparison
pred.fecund.aeg =
  emmeans::emmeans(mod1, specs = 'Line', mode = 'response') %>%
  data.frame() %>%
  dplyr::select(
    Line, mean.pro = emmean,
    sd.pro = SE,
    conf.inf = lower.CL,
    conf.sup = upper.CL
  )

head(pred.fecund.aeg)
```

|   | Line     | mean.pro | sd.pro    | conf.inf | conf.sup |
|---|----------|----------|-----------|----------|----------|
| 1 | Bra (WT) | 26.45834 | 7.182045  | 12.16832 | 40.74835 |
| 2 | Aaeg-M   | 23.00000 | 5.955554  | 11.15031 | 34.84968 |
| 3 | Aaeg-m   | 29.64999 | 7.574826  | 14.57847 | 44.72152 |
| 4 | Aaeg-CS  | 55.45453 | 14.027949 | 27.54332 | 83.36575 |

Replication

|   | Line     | N  |
|---|----------|----|
| 1 | Bra (WT) | 24 |
| 2 | Aaeg-M   | 24 |
| 3 | Aaeg-m   | 20 |
| 4 | Aaeg-CS  | 22 |

Plot .

```
fecund.plot.aeg = ggplot(data=NULL) +
  geom_point(data = fecund_aeg,
    aes(x = jitter(as.numeric(Line)),
```

```

      y = Eggs, color = Line),
      size = 2, show.legend = FALSE, alpha = 0.6) +
geom_point(data = pred.fecund.aeg,
           aes(x = as.numeric(Line),
              y = mean.pro),
           size = 1.5, show.legend = FALSE,
           color = 'black') +
geom_errorbar(data = pred.fecund.aeg,
             aes(x = as.numeric(Line),
                ymin = conf.inf,
                ymax = conf.sup), width = 0.05,
             color = 'black') +
annotate(geom = 'text', x= fecund.summary.aeg$pos, y = -15,
         label = paste0('N = ', fecund.summary.aeg$value),
         size = 4) +
annotate(geom = 'line', x= 1:2, y=170) +
annotate(geom = 'text', x= 1.5, y=185,
         label = 'n.s. (n.s.)',
         size = 4) +
annotate(geom = 'line', x= 1:3, y=205) +
annotate(geom = 'text', x= 2, y=220,
         label = 'n.s. (n.s.)',
         size = 4) +
annotate(geom = 'line', x= 1:4, y=240) +
annotate(geom = 'text', x= 2.5, y=255,
         label = '. (n.s.)',
         size = 4) +
labs(x = 'Line', y = 'Number of eggs per female',
     color = "Line") +
scale_y_continuous(breaks = c(0, 50, 100, 150), labels = c(0, 50, 100, 150)) +
coord_cartesian(clip = 'off', ylim = c(-20,150)) +
scale_color_manual(values = line.color.aeg,
                  labels = names(line.color.aeg)) +
scale_x_continuous(guide = guide_axis(angle = 30), breaks = 1:4,
                  labels = c("Bra (WT)", "Aaeg-M", "Aaeg-m", "Aaeg-CS")) +
theme_classic() +
theme(legend.position = 'none',
      axis.title.y = element_text(color = 'black',
                                  size = 12),
      axis.text.y = element_text(size = 10,
                                 hjust = 0, vjust = 0),
      axis.title.x = element_text(color = 'black',
                                  size = 12),
      axis.text.x = element_text(size = 10),
      plot.margin = unit(c(2,0,0,0), 'cm'))
fecund.plot.aeg

```



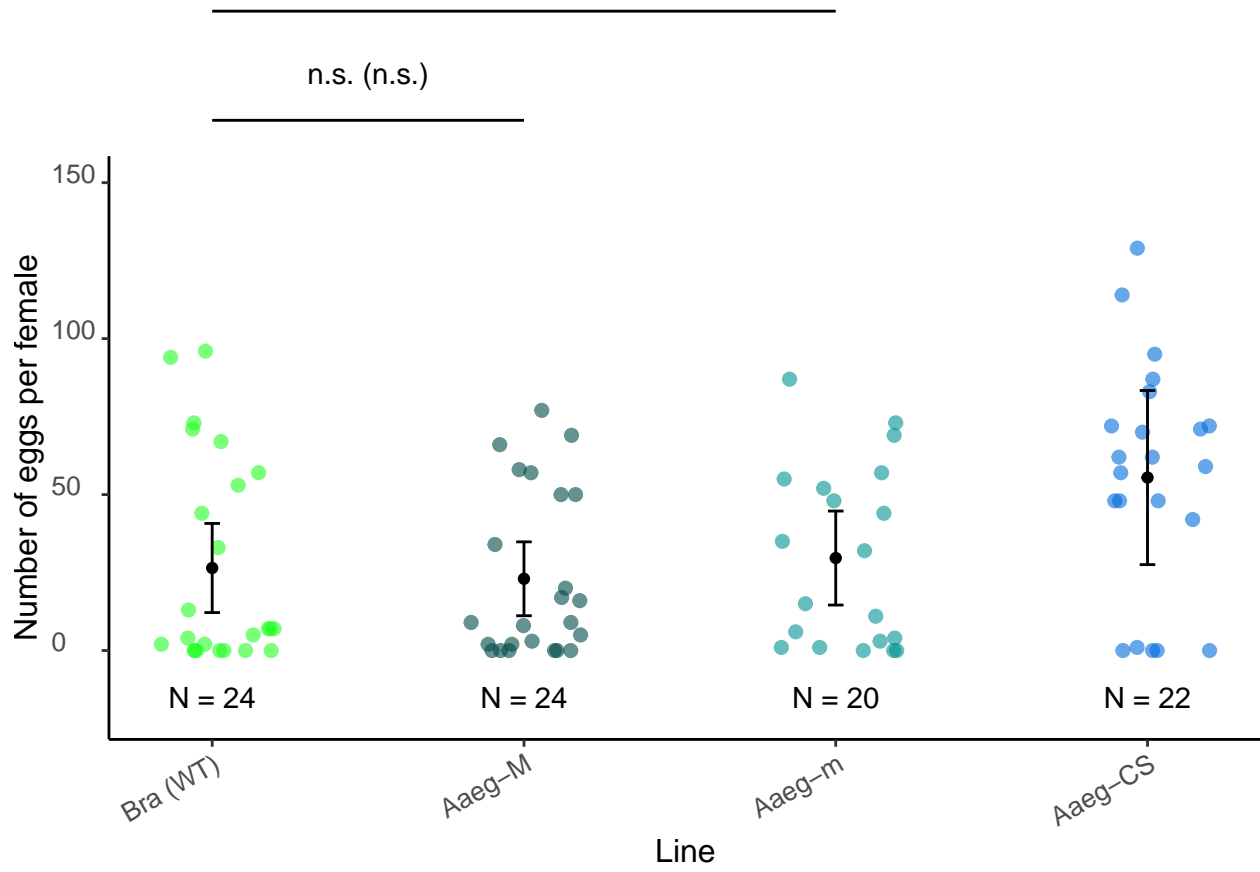

## Ae. albopictus

### Data

```
fecund_albo = read.table("data/Fecundity_albo.csv", header=TRUE, sep=";")  
  
fecund_albo = fecund_albo %>% filter(Eggs != "NA")  
  
fecund_albo$Line = factor(fecund_albo$Line,  
                          levels = c('BiA (WT)', 'Aal-M', 'Aal-m', 'Aal-CS'))  
  
fecund_albo$Species = "Ae. albopictus"  
  
fecund_albo
```

|    | Line     | Well | Eggs | Species        |
|----|----------|------|------|----------------|
| 1  | BiA (WT) | A1   | 3    | Ae. albopictus |
| 2  | BiA (WT) | A2   | 100  | Ae. albopictus |
| 3  | BiA (WT) | A3   | 1    | Ae. albopictus |
| 4  | BiA (WT) | A4   | 0    | Ae. albopictus |
| 5  | BiA (WT) | A5   | 97   | Ae. albopictus |
| 6  | BiA (WT) | A6   | 17   | Ae. albopictus |
| 7  | BiA (WT) | B1   | 1    | Ae. albopictus |
| 8  | BiA (WT) | B2   | 131  | Ae. albopictus |
| 9  | BiA (WT) | B3   | 67   | Ae. albopictus |
| 10 | BiA (WT) | B4   | 2    | Ae. albopictus |
| 11 | BiA (WT) | B5   | 75   | Ae. albopictus |
| 12 | BiA (WT) | B6   | 3    | Ae. albopictus |
| 13 | BiA (WT) | C1   | 7    | Ae. albopictus |
| 14 | BiA (WT) | C2   | 117  | Ae. albopictus |
| 15 | BiA (WT) | C3   | 0    | Ae. albopictus |
| 16 | BiA (WT) | C4   | 0    | Ae. albopictus |
| 17 | BiA (WT) | C5   | 19   | Ae. albopictus |
| 18 | BiA (WT) | C6   | 100  | Ae. albopictus |
| 19 | BiA (WT) | D1   | 38   | Ae. albopictus |
| 20 | BiA (WT) | D2   | 61   | Ae. albopictus |
| 21 | BiA (WT) | D3   | 0    | Ae. albopictus |
| 22 | BiA (WT) | D4   | 0    | Ae. albopictus |
| 23 | BiA (WT) | D6   | 42   | Ae. albopictus |
| 24 | Aal-CS   | A1   | 12   | Ae. albopictus |
| 25 | Aal-CS   | A2   | 0    | Ae. albopictus |
| 26 | Aal-CS   | A3   | 0    | Ae. albopictus |
| 27 | Aal-CS   | A4   | 1    | Ae. albopictus |
| 28 | Aal-CS   | A5   | 32   | Ae. albopictus |
| 29 | Aal-CS   | B1   | 23   | Ae. albopictus |
| 30 | Aal-CS   | B2   | 133  | Ae. albopictus |
| 31 | Aal-CS   | B3   | 0    | Ae. albopictus |
| 32 | Aal-CS   | B4   | 0    | Ae. albopictus |
| 33 | Aal-CS   | B5   | 106  | Ae. albopictus |
| 34 | Aal-CS   | B6   | 0    | Ae. albopictus |
| 35 | Aal-CS   | C1   | 0    | Ae. albopictus |
| 36 | Aal-CS   | C2   | 104  | Ae. albopictus |
| 37 | Aal-CS   | C3   | 77   | Ae. albopictus |
| 38 | Aal-CS   | C4   | 7    | Ae. albopictus |

|    |        |    |     |                |
|----|--------|----|-----|----------------|
| 39 | Aal-CS | C5 | 65  | Ae. albopictus |
| 40 | Aal-CS | C6 | 84  | Ae. albopictus |
| 41 | Aal-CS | D1 | 4   | Ae. albopictus |
| 42 | Aal-CS | D3 | 27  | Ae. albopictus |
| 43 | Aal-CS | D4 | 33  | Ae. albopictus |
| 44 | Aal-CS | D5 | 0   | Ae. albopictus |
| 45 | Aal-CS | D6 | 87  | Ae. albopictus |
| 46 | Aal-M  | A1 | 58  | Ae. albopictus |
| 47 | Aal-M  | A2 | 74  | Ae. albopictus |
| 48 | Aal-M  | A3 | 128 | Ae. albopictus |
| 49 | Aal-M  | A4 | 49  | Ae. albopictus |
| 50 | Aal-M  | A5 | 56  | Ae. albopictus |
| 51 | Aal-M  | A6 | 64  | Ae. albopictus |
| 52 | Aal-M  | B1 | 142 | Ae. albopictus |
| 53 | Aal-M  | B2 | 0   | Ae. albopictus |
| 54 | Aal-M  | B3 | 0   | Ae. albopictus |
| 55 | Aal-M  | B4 | 127 | Ae. albopictus |
| 56 | Aal-M  | B5 | 1   | Ae. albopictus |
| 57 | Aal-M  | B6 | 109 | Ae. albopictus |
| 58 | Aal-M  | C1 | 9   | Ae. albopictus |
| 59 | Aal-M  | C2 | 28  | Ae. albopictus |
| 60 | Aal-M  | C3 | 103 | Ae. albopictus |
| 61 | Aal-M  | C4 | 136 | Ae. albopictus |
| 62 | Aal-M  | C5 | 0   | Ae. albopictus |
| 63 | Aal-M  | C6 | 108 | Ae. albopictus |
| 64 | Aal-M  | D1 | 120 | Ae. albopictus |
| 65 | Aal-m  | A1 | 0   | Ae. albopictus |
| 66 | Aal-m  | A2 | 0   | Ae. albopictus |
| 67 | Aal-m  | A3 | 0   | Ae. albopictus |
| 68 | Aal-m  | A4 | 0   | Ae. albopictus |
| 69 | Aal-m  | A5 | 0   | Ae. albopictus |
| 70 | Aal-m  | A6 | 120 | Ae. albopictus |
| 71 | Aal-m  | B1 | 62  | Ae. albopictus |
| 72 | Aal-m  | B2 | 66  | Ae. albopictus |
| 73 | Aal-m  | B3 | 29  | Ae. albopictus |
| 74 | Aal-m  | B4 | 44  | Ae. albopictus |
| 75 | Aal-m  | B5 | 0   | Ae. albopictus |
| 76 | Aal-m  | B6 | 116 | Ae. albopictus |
| 77 | Aal-m  | C1 | 0   | Ae. albopictus |
| 78 | Aal-m  | C2 | 44  | Ae. albopictus |
| 79 | Aal-m  | C3 | 88  | Ae. albopictus |
| 80 | Aal-m  | C4 | 6   | Ae. albopictus |
| 81 | Aal-m  | C5 | 27  | Ae. albopictus |
| 82 | Aal-m  | C6 | 0   | Ae. albopictus |
| 83 | Aal-m  | D1 | 106 | Ae. albopictus |
| 84 | Aal-m  | D2 | 0   | Ae. albopictus |
| 85 | Aal-m  | D3 | 113 | Ae. albopictus |
| 86 | Aal-m  | D4 | 0   | Ae. albopictus |
| 87 | Aal-m  | D5 | 0   | Ae. albopictus |
| 88 | Aal-m  | D6 | 137 | Ae. albopictus |

```
fecund.summary.alb = fecund_albo %>%
  group_by(Line) %>%
  dplyr::summarise(value = n()) %>%
```

```
data.frame() %>%  
mutate(pos = c(1, 2, 3, 4))
```

## Model

Similarly to *Ae. aegypti*, a Hurdle model with negative binomial distribution (mod1) was chosen for analyzing fecundity data in *Ae. albopictus*.

```
# Generalized Linear Model with Poisson distribution (mod0)  
mod0 = glm(formula = 'Eggs ~ Line',  
           data = fecund_albo, family = 'poisson')  
check_distribution(mod0)
```

```
# Distribution of Model Family
```

```
Predicted Distribution of Residuals
```

| Distribution | Probability |
|--------------|-------------|
| normal       | 31%         |
| tweedie      | 25%         |
| cauchy       | 16%         |

```
Predicted Distribution of Response
```

| Distribution               | Probability |
|----------------------------|-------------|
| neg. binomial (zero-infl.) | 81%         |
| beta-binomial              | 9%          |
| tweedie                    | 6%          |

```
check_homogeneity(mod0)
```

```
OK: There is not clear evidence for different variances across groups (Bartlett Test, p = 0.859).
```

```
check_zeroinflation(mod0)
```

```
# Check for zero-inflation
```

```
Observed zeros: 26  
Predicted zeros: 0  
Ratio: 0.00
```

```
check_singularity(mod0)
```

```
[1] FALSE
```

```
# Negative Binomial Generalized Linear Model (mod)  
mod = MASS::glm.nb(formula = 'Eggs ~ Line',  
                  data = fecund_albo)
```

```
# Hurdle model with negative binomial distribution (mod1)
```

```

mod1 = pscl::hurdle(Eggs ~ Line,
  data = fecund_albo,
  dist = 'negbin')

#Hurdle model with Poisson distribution (mod2)
mod2 = pscl::hurdle(Eggs ~ Line,
  data = fecund_albo,
  dist = 'poisson')

# Performance comparison
performance::compare_performance(mod0, mod, mod1, mod2)

```

# Comparison of Model Performance Indices

| Name | Model  | AIC (weights)  | AICc (weights) | BIC (weights)  | RMSE   | Sigma  | Score_log | Score_ |
|------|--------|----------------|----------------|----------------|--------|--------|-----------|--------|
| mod0 | glm    | 5201.8 (<.001) | 5202.3 (<.001) | 5211.7 (<.001) | 45.966 | 7.604  | -29.510   |        |
| mod  | negbin | 5203.3 (<.001) | 5204.0 (<.001) | 5215.7 (<.001) | 45.966 | 7.604  | -29.510   |        |
| mod1 | hurdle | 754.2 (>.999)  | 756.5 (>.999)  | 776.5 (>.999)  | 45.966 | 48.514 | -4.925    |        |
| mod2 | hurdle | 2644.5 (<.001) | 2646.4 (<.001) | 2664.4 (<.001) | 45.966 | 48.209 | -18.201   |        |

```
summary(mod1)
```

Call:

```
pscl::hurdle(formula = Eggs ~ Line, data = fecund_albo, dist = "negbin")
```

Pearson residuals:

| Min     | 1Q      | Median  | 3Q     | Max    |
|---------|---------|---------|--------|--------|
| -0.8646 | -0.7144 | -0.2253 | 0.6598 | 1.9719 |

Count model coefficients (truncated negbin with log link):

|             | Estimate | Std. Error | z value | Pr(> z )   |
|-------------|----------|------------|---------|------------|
| (Intercept) | 3.87134  | 0.23601    | 16.403  | <2e-16 *** |
| LineAal-M   | 0.52400  | 0.34283    | 1.528   | 0.126      |
| LineAal-m   | 0.41586  | 0.36324    | 1.145   | 0.252      |
| LineAal-CS  | 0.08113  | 0.34946    | 0.232   | 0.816      |
| Log(theta)  | 0.02139  | 0.20175    | 0.106   | 0.916      |

Zero hurdle model coefficients (binomial with logit link):

|             | Estimate | Std. Error | z value | Pr(> z ) |
|-------------|----------|------------|---------|----------|
| (Intercept) | 1.2809   | 0.5055     | 2.534   | 0.0113 * |
| LineAal-M   | 0.3930   | 0.8071     | 0.487   | 0.6263   |
| LineAal-m   | -1.1139  | 0.6507     | -1.712  | 0.0869 . |
| LineAal-CS  | -0.5188  | 0.6820     | -0.761  | 0.4468   |

---

Signif. codes: 0 '\*\*\*' 0.001 '\*\*' 0.01 '\*' 0.05 '.' 0.1 ' ' 1

Theta: count = 1.0216

Number of iterations in BFGS optimization: 11

Log-likelihood: -368.1 on 9 Df

```
emmeans::emmeans(mod1, specs = 'Line', mode = 'response')
```

| Line     | emmean | SE    | df | lower.CL | upper.CL |
|----------|--------|-------|----|----------|----------|
| BiA (WT) | 38.3   | 9.81  | 79 | 18.8     | 57.8     |
| Aal-M    | 69.1   | 18.33 | 79 | 32.6     | 105.5    |
| Aal-m    | 39.9   | 13.22 | 79 | 13.6     | 66.2     |
| Aal-CS   | 36.1   | 10.57 | 79 | 15.1     | 57.2     |

Confidence level used: 0.95

```
# Pairwise comparison
pred.fecund.albo =
  emmeans::emmeans(mod1, specs = 'Line', mode = 'response') %>%
  data.frame() %>%
  dplyr::select(
    Line, mean.pro = emmean,
    sd.pro = SE,
    conf.inf = lower.CL,
    conf.sup = upper.CL
  )
head(pred.fecund.albo)
```

|   | Line     | mean.pro | sd.pro    | conf.inf | conf.sup  |
|---|----------|----------|-----------|----------|-----------|
| 1 | BiA (WT) | 38.30436 | 9.812262  | 18.77354 | 57.83518  |
| 2 | Aal-M    | 69.05264 | 18.331136 | 32.56543 | 105.53986 |
| 3 | Aal-m    | 39.91664 | 13.223746 | 13.59543 | 66.23785  |
| 4 | Aal-CS   | 36.13637 | 10.567392 | 15.10250 | 57.17024  |

Replication

|   | Line     | N  |
|---|----------|----|
| 1 | BiA (WT) | 23 |
| 2 | Aal-M    | 19 |
| 3 | Aal-m    | 24 |
| 4 | Aal-CS   | 22 |

Plot .

```
fecund.plot.alb = ggplot(data=NULL) +
  geom_point(data = fecund_albo,
    aes(x = jitter(as.numeric(Line)),
        y = Eggs, color = Line),
    size = 2, show.legend = FALSE, alpha = 0.6) +
  geom_point(data = pred.fecund.albo,
    aes(x = as.numeric(Line),
        y = mean.pro),
    size = 1.5, show.legend = FALSE,
    color = 'black') +
  geom_errorbar(data = pred.fecund.albo,
    aes(x = as.numeric(Line),
```

```

        ymin = conf.inf,
        ymax = conf.sup), width = 0.05,
        color = 'black') +
annotate(geom = 'text', x= fecund.summary.alb$pos, y = -15,
        label = paste0('N = ', fecund.summary.alb$value),
        size = 4) +
annotate(geom = 'line', x= 1:2, y=170) +
annotate(geom = 'text', x= 1.5, y=185,
        label = '*** (n.s.)',
        size = 4) +
annotate(geom = 'line', x= 1:3, y=205) +
annotate(geom = 'text', x= 2, y=220,
        label = '*** (.)',
        size = 4) +
annotate(geom = 'line', x= 1:4, y=240) +
annotate(geom = 'text', x= 2.5, y=255,
        label = 'n.s. (n.s.)',
        size = 4) +
labs(x = 'Line', y = 'Number of eggs per female',
        color = "Line") +
scale_y_continuous(breaks = c(0, 50, 100, 150), labels = c(0, 50, 100, 150)) +
coord_cartesian(clip = 'off', ylim = c(-20,150)) +
scale_color_manual(values = line.color.alb,
        labels = names(line.color.alb)) +
scale_x_continuous(guide = guide_axis(angle = 30), breaks = 1:4,
        labels = c("BiA (WT)",
        "Aal-M",
        "Aal-m",
        "Aal-CS")) +
theme_classic() +
theme(legend.position = 'none',
        panel.background = element_rect(fill = "grey"),
        axis.title.y = element_text(color = 'black',
        size = 12),
        axis.text.y = element_text(size = 10,
        hjust = 0, vjust = 0),
        axis.title.x = element_text(color = 'black',
        size = 12),
        axis.text.x = element_text(size = 10),
        plot.margin = unit(c(2,0,0,0), 'cm'))

```

fecund.plot.alb

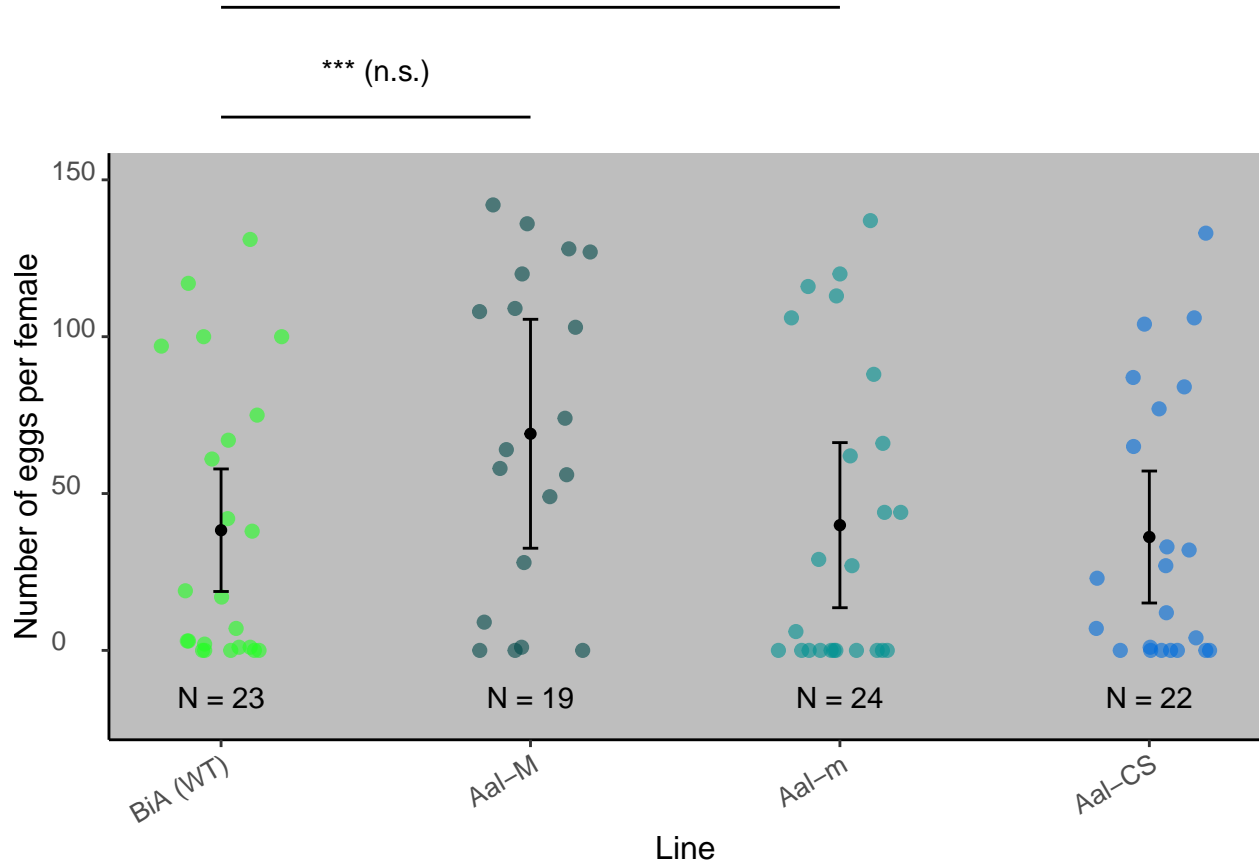



## Larva survival

### Ae. aegypti

#### Data

```
surv.aeg.larv = read.table("data/Survival-larvae_aeg.csv",
                          sep = ";", header = T)
surv.aeg.larv = surv.aeg.larv %>%
  dplyr::select(Replicate, Line, larvae, adults)

surv.aeg.larv$Species = "Ae. aegypti"

surv.aeg.larv$Line = factor(surv.aeg.larv$Line,
                            levels = c('Bra (WT)', 'Aaeg-M', 'Aaeg-m', 'Aaeg-CS'))

surv.aeg.larv$survie = surv.aeg.larv$adults/surv.aeg.larv$larvae * 100

surv.aeg.larv
```

|    | Replicate | Line     | larvae | adults | Species     | survie |
|----|-----------|----------|--------|--------|-------------|--------|
| 1  | 1         | Aaeg-M   | 100    | 87     | Ae. aegypti | 87.0   |
| 2  | 2         | Aaeg-M   | 100    | 82     | Ae. aegypti | 82.0   |
| 3  | 3         | Aaeg-M   | 100    | 93     | Ae. aegypti | 93.0   |
| 4  | 4         | Aaeg-M   | 100    | 73     | Ae. aegypti | 73.0   |
| 5  | 1         | Aaeg-m   | 100    | 96     | Ae. aegypti | 96.0   |
| 6  | 2         | Aaeg-m   | 100    | 100    | Ae. aegypti | 100.0  |
| 7  | 3         | Aaeg-m   | 100    | 96     | Ae. aegypti | 96.0   |
| 8  | 4         | Aaeg-m   | 100    | 90     | Ae. aegypti | 90.0   |
| 9  | 1         | Bra (WT) | 200    | 185    | Ae. aegypti | 92.5   |
| 10 | 2         | Bra (WT) | 200    | 197    | Ae. aegypti | 98.5   |
| 11 | 3         | Bra (WT) | 200    | 177    | Ae. aegypti | 88.5   |
| 12 | 4         | Bra (WT) | 200    | 197    | Ae. aegypti | 98.5   |
| 13 | 1         | Aaeg-CS  | 100    | 96     | Ae. aegypti | 96.0   |
| 14 | 2         | Aaeg-CS  | 100    | 98     | Ae. aegypti | 98.0   |
| 15 | 3         | Aaeg-CS  | 100    | 99     | Ae. aegypti | 99.0   |
| 16 | 4         | Aaeg-CS  | 100    | 100    | Ae. aegypti | 100.0  |
| 17 | 5         | Aaeg-M   | 100    | 95     | Ae. aegypti | 95.0   |
| 18 | 6         | Aaeg-M   | 100    | 95     | Ae. aegypti | 95.0   |
| 19 | 7         | Aaeg-M   | 100    | 95     | Ae. aegypti | 95.0   |
| 20 | 8         | Aaeg-M   | 100    | 97     | Ae. aegypti | 97.0   |

#### Model

```
mod.tot.sl.aeg = lm(data=surv.aeg.larv, formula = survie ~ Line)
mod.tot.sl.aeg %>% summary()
```

#### Call:

```
lm(formula = survie ~ Line, data = surv.aeg.larv)
```

#### Residuals:

| Min     | 1Q     | Median | 3Q    | Max   |
|---------|--------|--------|-------|-------|
| -16.625 | -2.344 | 0.625  | 4.125 | 7.375 |

Coefficients:

|             | Estimate | Std. Error | t value | Pr(> t )     |
|-------------|----------|------------|---------|--------------|
| (Intercept) | 94.500   | 3.127      | 30.225  | 1.52e-15 *** |
| LineAaeg-M  | -4.875   | 3.829      | -1.273  | 0.221        |
| LineAaeg-m  | 1.000    | 4.422      | 0.226   | 0.824        |
| LineAaeg-CS | 3.750    | 4.422      | 0.848   | 0.409        |

---

Signif. codes: 0 '\*\*\*' 0.001 '\*\*' 0.01 '\*' 0.05 '.' 0.1 ' ' 1

Residual standard error: 6.253 on 16 degrees of freedom  
 Multiple R-squared: 0.2691, Adjusted R-squared: 0.1321  
 F-statistic: 1.964 on 3 and 16 DF, p-value: 0.1601

```
mod.tot.sl.aeg %>% aov %>% TukeyHSD()
```

Tukey multiple comparisons of means  
 95% family-wise confidence level

Fit: aov(formula = .)

```
$Line
      diff      lwr      upr    p adj
Aaeg-M-Bra (WT) -4.875 -15.830534  6.080534 0.5920067
Aaeg-m-Bra (WT)  1.000 -11.650361 13.650361 0.9957513
Aaeg-CS-Bra (WT)  3.750  -8.900361 16.400361 0.8308209
Aaeg-m-Aaeg-M    5.875  -5.080534 16.830534 0.4414047
Aaeg-CS-Aaeg-M   8.625  -2.330534 19.580534 0.1514294
Aaeg-CS-Aaeg-m   2.750  -9.900361 15.400361 0.9235384
```

```
df.larv.aeg = ggpredict(mod.tot.sl.aeg) %>%
  data.frame %>%
  dplyr::select(
    Line = Line.x,
    m = Line.predicted,
    sd = Line.std.error,
    conf.inf = Line.conf.low,
    conf.sup = Line.conf.high
  )
df.larv.aeg$Line = factor(df.larv.aeg$Line,
  levels = c('Bra (WT)', 'Aaeg-M', 'Aaeg-m', 'Aaeg-CS'))
```

```
df.larv.aeg
```

|   | Line     | m      | sd       | conf.inf | conf.sup  |
|---|----------|--------|----------|----------|-----------|
| 1 | Bra (WT) | 94.500 | 3.126562 | 87.87198 | 101.12802 |
| 2 | Aaeg-M   | 89.625 | 2.210813 | 84.93829 | 94.31171  |
| 3 | Aaeg-m   | 95.500 | 3.126562 | 88.87198 | 102.12802 |
| 4 | Aaeg-CS  | 98.250 | 3.126562 | 91.62198 | 104.87802 |

Replication

```
# A tibble: 4 x 3
  Line      N      n
  <fct> <int> <int>
1 Bra (WT)     4    800
2 Aaeg-M       8    800
3 Aaeg-m       4    400
4 Aaeg-CS      4    400
```

Model quality

```
check_model(mod.tot.sl.aeg)
```

### Posterior Predictive Check

Model-predicted lines should resemble observed data

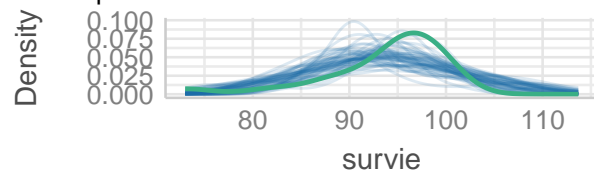

### Linearity

Reference line should be flat and horizontal

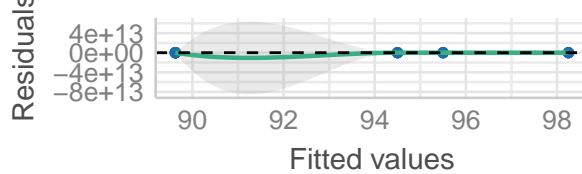

— predicted data — Observed data — Observed data

### Homogeneity of Variance

Reference line should be flat and horizontal

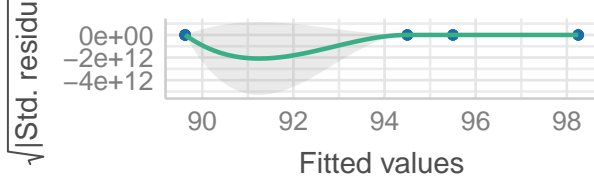

### Influential Observations

Points should be inside the contour lines

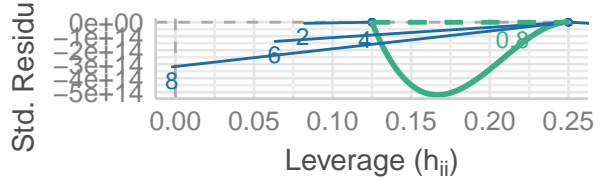

### Normality of Residuals

Dots should fall along the line

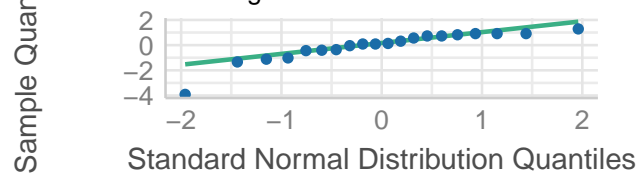

```
larval.surv.plot.aeg = ggplot(data = NULL,
                              aes()) +
  geom_point(data = surv.aeg.larv,
            aes(x = jitter(as.numeric(factor(Line))),
                y = survie, color = Line),
            size = 2, alpha = 0.6) +
  geom_point(data = df.larv.aeg,
            aes(x = Line, y = m),
            col = 'black') +
```

```

geom_errorbar(data = df.larv.aeg, aes(x = Line, ymin = conf.inf,
                                     ymax = conf.sup),
             width = 0.05, col = 'black') +
annotate(geom = 'text', x = 1:4, y = 20,
        label = c("N = 4", "N = 8", "N = 4", "N = 4"),
        size = 4) +
annotate(geom = 'text', x = 1:4, y = 5,
        label = c("n = 800", "n = 400", "n = 400", "n = 400"),
        size = 4) +
annotate(geom = 'line', x = 1:4, y = 152) +
annotate(geom = 'text', x = 2.5, y = 162,
        label = 'n.s.',
        size = 4) +
annotate(geom = 'line', x = 1:3, y = 132) +
annotate(geom = 'text', x = 2, y = 142,
        label = 'n.s.',
        size = 4) +
annotate(geom = 'line', x = 1:2, y = 112) +
annotate(geom = 'text', x = 1.5, y = 122,
        label = 'n.s.',
        size = 4) +
scale_x_discrete(limits = levels(df.larv.aeg$Line),
                labels = c("Bra (WT)",
                          "Aaeg-M",
                          "Aaeg-m",
                          "Aaeg-CS"
                          ),
                ),
guide = guide_axis(angle = 30)) +
scale_y_continuous(breaks = c(0, 25, 50, 75, 100),
                  labels = c(0, 25, 50, 75, 100)) +
scale_color_manual(labels = names(line.color.aeg),
                  values = line.color.aeg) +
coord_cartesian(clip = 'off', ylim = c(0,100)) +
labs(x = 'Line',
     y = 'Larva to adult survival (%)',
     color = 'Line') +
theme_classic() +
theme(legend.position = 'none',
      axis.title.y = element_text(color = 'black',
                                  size = 12),
      axis.text.y = element_text(size = 10,
                                 hjust = 0, vjust = 0),
      axis.title.x = element_text(color = 'black',
                                  size = 12),
      axis.text.x = element_text(size = 10),
      plot.margin = unit(c(2,0,0,0), 'cm'))

```

larval.surv.plot.aeg

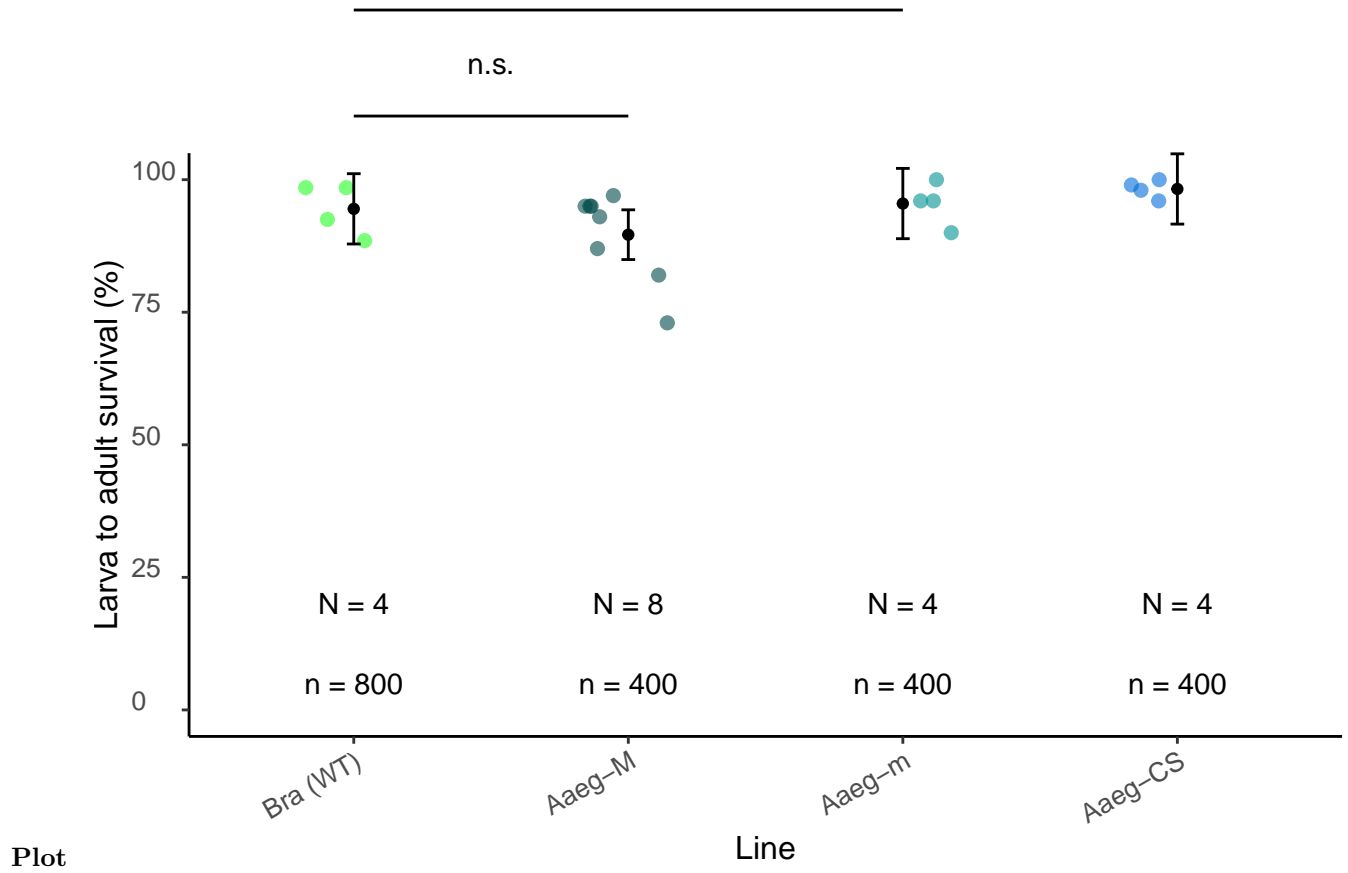

## Ae. albopictus

### Data

```
surv.alb.larv = read.table("data/Survival-larvae_albo.csv",
                          sep = ";", header = T)
surv.alb.larv = surv.alb.larv %>%
  dplyr::select( Replicate, Line, larvae, adults)

surv.alb.larv$Species = "Ae. albopictus"

surv.alb.larv$Line = factor(surv.alb.larv$Line,
                            levels = c('BiA (WT)', 'Aal-M', 'Aal-m', 'Aal-CS'))

surv.alb.larv$survie = surv.alb.larv$adults/surv.alb.larv$larvae * 100

surv.alb.larv
```

|    | Replicate | Line     | larvae | adults | Species        | survie |
|----|-----------|----------|--------|--------|----------------|--------|
| 1  | 1         | BiA (WT) | 200    | 103    | Ae. albopictus | 51.5   |
| 2  | 2         | BiA (WT) | 200    | 141    | Ae. albopictus | 70.5   |
| 3  | 3         | BiA (WT) | 200    | 129    | Ae. albopictus | 64.5   |
| 4  | 4         | BiA (WT) | 200    | 130    | Ae. albopictus | 65.0   |
| 5  | 1         | Aal-M    | 100    | 88     | Ae. albopictus | 88.0   |
| 6  | 2         | Aal-M    | 100    | 79     | Ae. albopictus | 79.0   |
| 7  | 3         | Aal-M    | 100    | 80     | Ae. albopictus | 80.0   |
| 8  | 4         | Aal-M    | 100    | 77     | Ae. albopictus | 77.0   |
| 9  | 1         | Aal-m    | 100    | 82     | Ae. albopictus | 82.0   |
| 10 | 2         | Aal-m    | 100    | 83     | Ae. albopictus | 83.0   |
| 11 | 3         | Aal-m    | 100    | 76     | Ae. albopictus | 76.0   |
| 12 | 4         | Aal-m    | 100    | 77     | Ae. albopictus | 77.0   |
| 13 | 1         | Aal-CS   | 100    | 71     | Ae. albopictus | 71.0   |
| 14 | 2         | Aal-CS   | 100    | 73     | Ae. albopictus | 73.0   |
| 15 | 3         | Aal-CS   | 100    | 61     | Ae. albopictus | 61.0   |
| 16 | 4         | Aal-CS   | 100    | 69     | Ae. albopictus | 69.0   |

### Model

```
mod.tot.sl.alb = lm(data=surv.alb.larv, formula = survie ~ Line)
mod.tot.sl.alb %>% summary()
```

Call:

```
lm(formula = survie ~ Line, data = surv.alb.larv)
```

Residuals:

| Min     | 1Q     | Median | 3Q    | Max   |
|---------|--------|--------|-------|-------|
| -11.375 | -2.750 | 1.062  | 2.750 | 7.625 |

Coefficients:

|             | Estimate | Std. Error | t value | Pr(> t )     |
|-------------|----------|------------|---------|--------------|
| (Intercept) | 62.875   | 2.831      | 22.210  | 4.09e-11 *** |

```
LineAal-M      18.125      4.004      4.527 0.000693 ***
LineAal-m      16.625      4.004      4.153 0.001341 **
LineAal-CS      5.625      4.004      1.405 0.185378
```

---

Signif. codes: 0 '\*\*\*' 0.001 '\*\*' 0.01 '\*' 0.05 '.' 0.1 ' ' 1

Residual standard error: 5.662 on 12 degrees of freedom  
Multiple R-squared: 0.7043, Adjusted R-squared: 0.6303  
F-statistic: 9.525 on 3 and 12 DF, p-value: 0.001695

```
mod.tot.sl.alb %>% aov %>% TukeyHSD()
```

Tukey multiple comparisons of means  
95% family-wise confidence level

Fit: aov(formula = .)

```
$Line
      diff      lwr      upr      p adj
Aal-M-BiA (WT) 18.125  6.238769 30.0112306 0.0033427
Aal-m-BiA (WT) 16.625  4.738769 28.5112306 0.0063439
Aal-CS-BiA (WT)  5.625 -6.261231 17.5112306 0.5198078
Aal-m-Aal-M     -1.500 -13.386231 10.3862306 0.9812185
Aal-CS-Aal-M    -12.500 -24.386231 -0.6137694 0.0383297
Aal-CS-Aal-m    -11.000 -22.886231  0.8862306 0.0730385
```

```
df.larv.alb = ggpredict(mod.tot.sl.alb) %>%
  data.frame %>%
  dplyr::select(
    Line = Line.x,
    m = Line.predicted,
    sd = Line.std.error,
    conf.inf = Line.conf.low,
    conf.sup = Line.conf.high
  )
df.larv.alb$Line = factor(df.larv.alb$Line,
  levels = c('BiA (WT)', 'Aal-M', 'Aal-m', 'Aal-CS'))
df.larv.alb
```

```
      Line      m      sd conf.inf conf.sup
1 BiA (WT) 62.875 2.830958 56.70687 69.04313
2  Aal-M  81.000 2.830958 74.83187 87.16813
3  Aal-m  79.500 2.830958 73.33187 85.66813
4  Aal-CS 68.500 2.830958 62.33187 74.66813
```

Replication

```
# A tibble: 4 x 3
  Line      N      n
  <fct> <int> <int>
1 BiA (WT)     4    800
2 Aal-M        4    400
3 Aal-m        4    400
4 Aal-CS       4    400
```

Model quality

```
check_model(mod.tot.sl.alb)
```

### Posterior Predictive Check

Model-predicted lines should resemble observed data

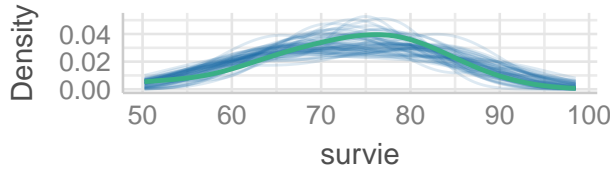

### Linearity

Reference line should be flat and horizontal

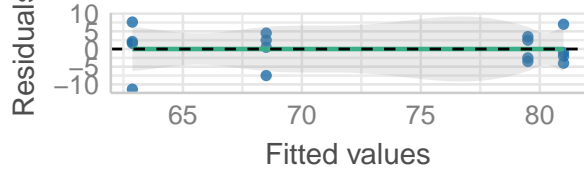

— predicted data — Observed data — Observed data

### Homogeneity of Variance

Reference line should be flat and horizontal

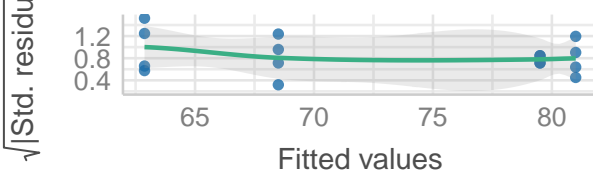

### Influential Observations

Points should be inside the contour lines

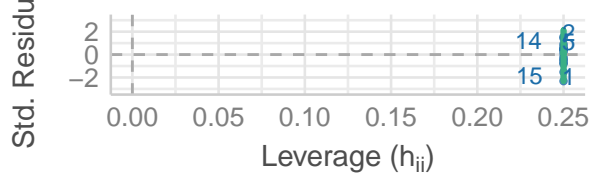

### Normality of Residuals

Points should fall along the line

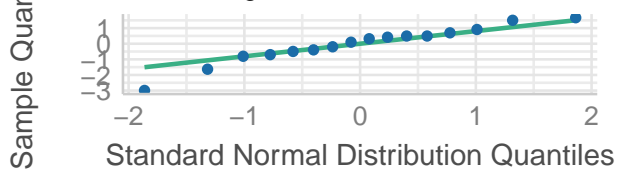

Plot

```
larval.surv.plot.alb = ggplot(data = NULL,
                             aes()) +
  geom_point(data = surv.alb.larv,
            aes(x = jitter(as.numeric(factor(Line))),
                y = survie, color = Line),
            size = 2, alpha = 0.6) +
  geom_point(data = df.larv.alb,
            aes(x = Line, y = m), col = 'black') +
  geom_errorbar(data = df.larv.alb,
               aes(x = Line,
                   ymin = conf.inf,
                   ymax = conf.sup),
               width = 0.05, col = 'black') +
  annotate(geom = 'text', x = 1:4, y = 20,
          label = c("N = 4", "N = 4", "N = 4", "N = 4"),
          size = 4) +
  annotate(geom = 'text', x = 1:4, y = 5,
          label = c("n = 800", "n = 400", "n = 400", "n = 400"),
          size = 4) +
```



```

annotate(geom = 'line', x = 1:4, y = 152) +
annotate(geom = 'text', x = 2.5, y = 162,
         label = 'n.s.',
         size = 4) +
annotate(geom = 'line', x = 1:3, y = 132) +
annotate(geom = 'text', x = 2, y = 142,
         label = '**',
         size = 4) +
annotate(geom = 'line', x = 1:2, y = 112) +
annotate(geom = 'text', x = 1.5, y = 122,
         label = '**',
         size = 4) +
scale_x_discrete(limits = levels(df.larv.alb$Line),
                 labels = c("BiA (WT)",
                           "Aal-M",
                           "Aal-m",
                           "Aal-CS"
                           ),
                 ),
guide = guide_axis(angle = 30)) +
scale_y_continuous(breaks = c(0, 25, 50, 75, 100),
                  labels = c(0, 25, 50, 75, 100)) +
coord_cartesian(clip = 'off', ylim = c(0,100)) +
scale_color_manual(labels = names(line.color.alb),
                  values = line.color.alb) +
labs(x = 'Line',
     y = 'Larva to adult survival (%)',
     color = 'Line') +
theme_classic() +
theme(legend.position = 'none',
      panel.background = element_rect(fill = "grey"),
      axis.title.y = element_text(color = 'black',
                                  size = 12),
      axis.text.y = element_text(size = 10,
                                 hjust = 0, vjust = 0),
      axis.title.x = element_text(color = 'black',
                                  size = 12),
      axis.text.x = element_text(size = 10),
      plot.margin = unit(c(2,0,0,0), 'cm'))
larval.surv.plot.alb

```

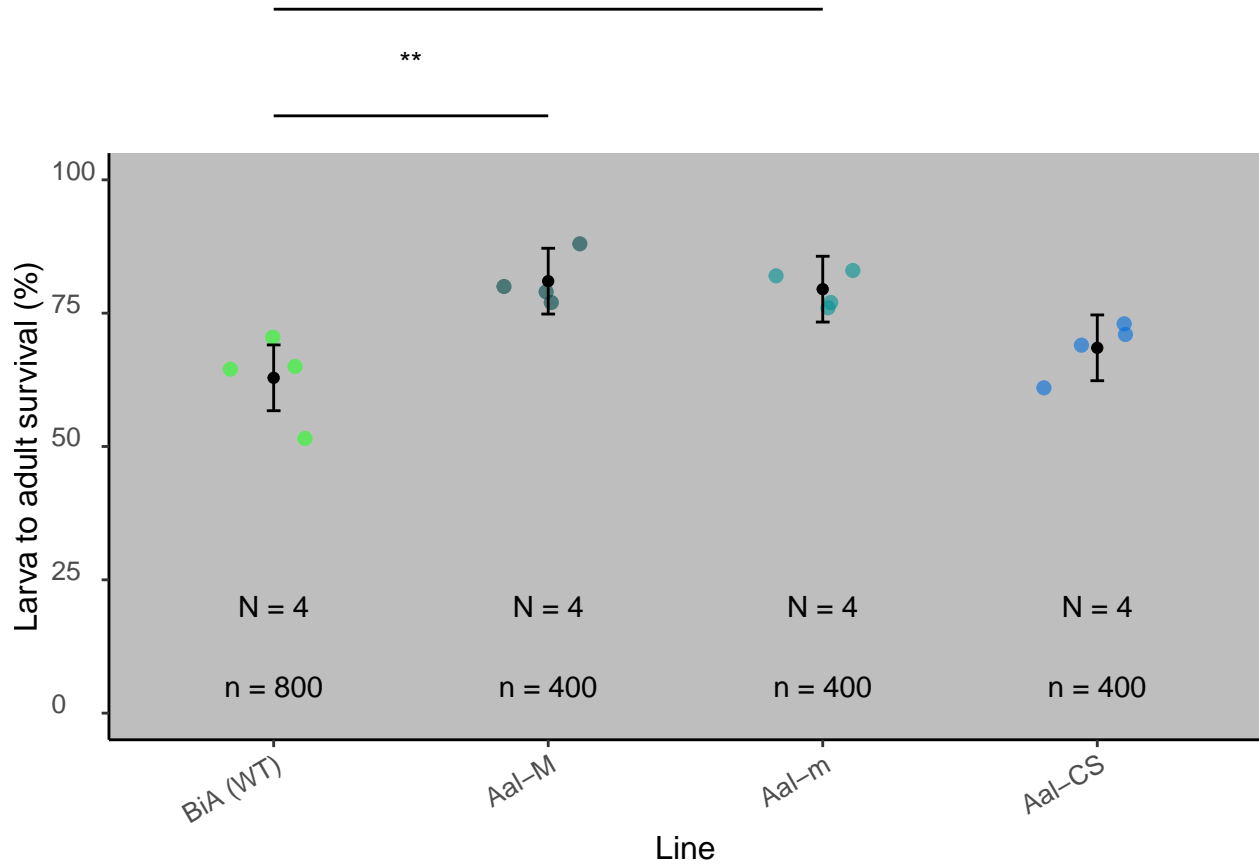

## Figure 4

### Competitiveness

Ae. aegypti

```
compet_aeg <- read.table("data/Competitiveness_aeg.csv",
                        header = TRUE, sep=",")
compet_aeg$total = compet_aeg$tsg + compet_aeg$no_tsg
compet_aeg$comp = compet_aeg$tsg / (compet_aeg$total) * 100
compet_aeg$line = factor(x = compet_aeg$line,
                        levels = c('Expected', 'Aaeg-M', 'Aaeg-CS'))
compet_aeg
```

### Data

|    | line     | Replicate | tsg  | no_tsg | total | comp     |
|----|----------|-----------|------|--------|-------|----------|
| 1  | Expected | 1         | 1300 | 3700   | 5000  | 26.00000 |
| 2  | Aaeg-M   | 1         | 632  | 1758   | 2390  | 26.44351 |
| 3  | Aaeg-M   | 2         | 618  | 1670   | 2288  | 27.01049 |
| 4  | Aaeg-M   | 3         | 740  | 1472   | 2212  | 33.45389 |
| 5  | Aaeg-M   | 4         | 493  | 1775   | 2268  | 21.73721 |
| 6  | Aaeg-M   | 5         | 522  | 1554   | 2076  | 25.14451 |
| 7  | Aaeg-CS  | 1         | 101  | 486    | 587   | 17.20613 |
| 8  | Aaeg-CS  | 2         | 411  | 1268   | 1679  | 24.47886 |
| 9  | Aaeg-CS  | 3         | 459  | 847    | 1306  | 35.14548 |
| 10 | Aaeg-CS  | 4         | 153  | 450    | 603   | 25.37313 |
| 11 | Aaeg-CS  | 5         | 436  | 1033   | 1469  | 29.68005 |

```
compet.aeg =
  rbind(
    data.frame(replicate = compet_aeg[1,2],
              line = compet_aeg[1,1],
              result = rep(1, compet_aeg[1,3])),
    data.frame(replicate = compet_aeg[1,2],
              line = compet_aeg[1,1],
              result = rep(0, compet_aeg[1,4])))

for(i in 2:nrow(compet_aeg)){
  compet.aeg =
    rbind(
      compet.aeg,
      data.frame(replicate = compet_aeg[i,2],
                line = compet_aeg[i,1],
                result = rep(1, compet_aeg[i,3])),
      data.frame(replicate = compet_aeg[i,2],
                line = compet_aeg[i,1],
                result = rep(0, compet_aeg[i,4]))
    )
}
```

```

compet.aeg$line = factor(x = compet.aeg$line,
                        levels = c('Expected', 'Aaeg-M', 'Aaeg-CS'))
compet.aeg$Species = "Ae. aegypti"

sum.compet.aeg = compet.aeg %>%
  filter(line != 'Expected') %>%
  group_by(line) %>%
  dplyr::summarize(value = n(),
                  N = max(replicate)) %>%
  data.frame() %>%
  mutate(pos = c(1,2))

head(compet.aeg)

```

| replicate | line | result   | Species       |
|-----------|------|----------|---------------|
| 1         | 1    | Expected | 1 Ae. aegypti |
| 2         | 1    | Expected | 1 Ae. aegypti |
| 3         | 1    | Expected | 1 Ae. aegypti |
| 4         | 1    | Expected | 1 Ae. aegypti |
| 5         | 1    | Expected | 1 Ae. aegypti |
| 6         | 1    | Expected | 1 Ae. aegypti |

```

Expected_Aaeg_M = 0.26
Expected_Aaeg_CS = 0.26

```

## Model

```

# Generalized linear model with Bernoulli distribution
cpt.aeg = glm(formula = 'result ~ line',
              family = binomial,
              data = compet.aeg)
summary(cpt.aeg)

```

Call:

```
glm(formula = "result ~ line", family = binomial, data = compet.aeg)
```

Deviance Residuals:

| Min     | 1Q      | Median  | 3Q     | Max    |
|---------|---------|---------|--------|--------|
| -0.8044 | -0.7890 | -0.7890 | 1.6037 | 1.6414 |

Coefficients:

|             | Estimate | Std. Error | z value | Pr(> z )   |
|-------------|----------|------------|---------|------------|
| (Intercept) | -1.04597 | 0.03224    | -32.442 | <2e-16 *** |
| lineAaeg-M  | 0.03858  | 0.03865    | 0.998   | 0.3182     |
| lineAaeg-CS | 0.08358  | 0.04388    | 1.905   | 0.0568 .   |

---

Signif. codes: 0 '\*\*\*' 0.001 '\*\*' 0.01 '\*' 0.05 '.' 0.1 ' ' 1

(Dispersion parameter for binomial family taken to be 1)

Null deviance: 25437 on 21877 degrees of freedom  
Residual deviance: 25433 on 21875 degrees of freedom  
AIC: 25439

Number of Fisher Scoring iterations: 4

```
# Pairwise comparison  
cpt.aeg.pred = ggpredict(cpt.aeg) %>% data.frame()  
  
cpt.aeg.pred %>% dplyr::select(Line = line.x,  
                             Mean = line.predicted,  
                             SE = line.std.error,  
                             CI.low = line.conf.low,  
                             CI.high = line.conf.high)
```

|   | Line     | Mean      | SE         | CI.low    | CI.high   |
|---|----------|-----------|------------|-----------|-----------|
| 1 | Expected | 0.2600000 | 0.03224127 | 0.2480275 | 0.2723411 |
| 2 | Aaeg-M   | 0.2674915 | 0.02131430 | 0.2593860 | 0.2757561 |
| 3 | Aaeg-CS  | 0.2763997 | 0.02976378 | 0.2648858 | 0.2882179 |

Replication

|   | Line    | N | n     |
|---|---------|---|-------|
| 1 | Aaeg-M  | 5 | 11234 |
| 2 | Aaeg-CS | 5 | 5644  |

Model fit quality

```
check_model(cpt.aeg)
```

### Posterior Predictive Check

Model-predicted lines should resemble observed data

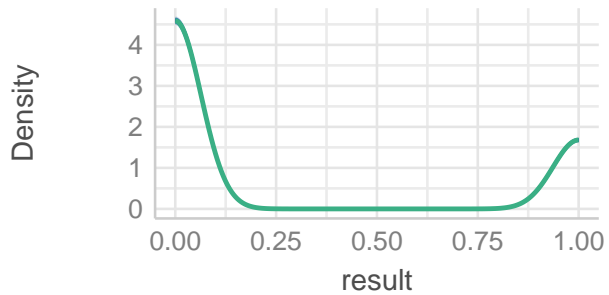

### Binned Residuals

Points should be within error bounds

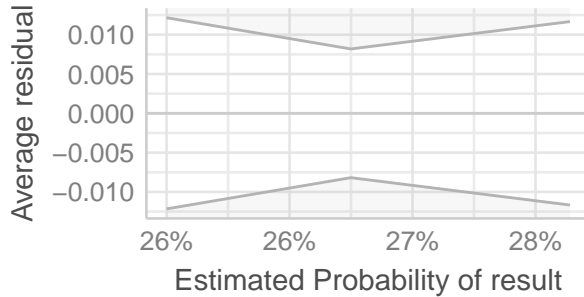

-predicted data — Observed data — Observed data

### Influential Observations

Points should be inside the contour lines

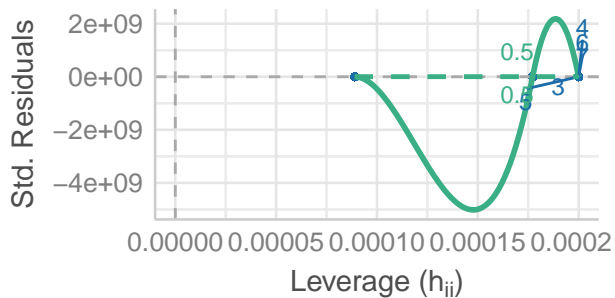

### Normality of Residuals

Dots should fall along the line

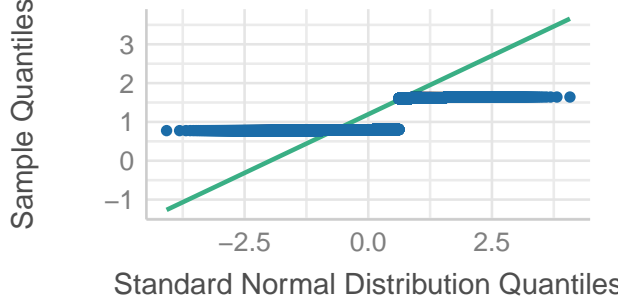

Plot .

```

comp.aeg.plot =
  ggplot(data = NULL) +
  geom_point(data = compet_aeg[compet_aeg$line!='Expected',],
            aes(x = jitter(as.numeric(factor(line))),
                y = comp,
                color = line),
            size = 2, alpha = .6)+
  geom_point(data = cpt.aeg.pred[-1,],
            aes(x = (as.numeric(line.x)-1),
                y = line.predicted * 100),
            size = 1.5, color = 'black') +
  geom_errorbar(data = cpt.aeg.pred[-1,],
               aes(x = (as.numeric(line.x)-1),
                   ymin = line.conf.low* 100,
                   ymax = line.conf.high* 100),
               width = 0.05, color = 'black') +
  annotate(geom = 'text', x = sum.compet.aeg$pos, y=85,
          label = paste0('n = ', sum.compet.aeg$value),
          size = 4) +
  annotate(geom = 'text', x= sum.compet.aeg$pos, y=95,
          label = c('N = 5', 'N = 5'),
          size = 4) +
  annotate(geom = 'line', x = c(.75, 1.25),

```

```

    y = rep(Expected_Aaeg_M*100, 2),
    lty = 2, color = 'grey30') +
annotate(geom = 'line', x = c(1.75, 2.25),
    y = rep(Expected_Aaeg_CS*100, 2),
    lty = 2, color = 'grey30') +
annotate(geom = 'text', x = 2, y=50,
    label = 'n.s.',
    size = 4) +
annotate(geom = 'text', x = 1, y=50,
    label = 'n.s.',
    size = 4) +
scale_x_continuous(breaks = 1:2,
    labels = c("Bra (WT) vs. Aaeg-M",
    "Aaeg-CS vs. Aaeg-M"),
    limits = c(.5,2.5)) +
scale_y_continuous(limits = c(0,100),
    breaks = c(0,25,50,75,100)) +
scale_color_manual(values = line.color.aeg, labels = names(line.color.aeg)) +
labs(x = 'Line ',
    y = 'Transgenic progeny (%)') +
theme_classic() +
theme(legend.position = 'none',
    axis.title.y = element_text(color = 'black',
    size = 12),
    axis.text.y = element_text(size = 10,
    hjust = 0, vjust = 0),
    axis.title.x = element_text(color = 'black',
    size = 12),
    axis.text.x = element_text(size = 10))

```

comp.aeg.plot

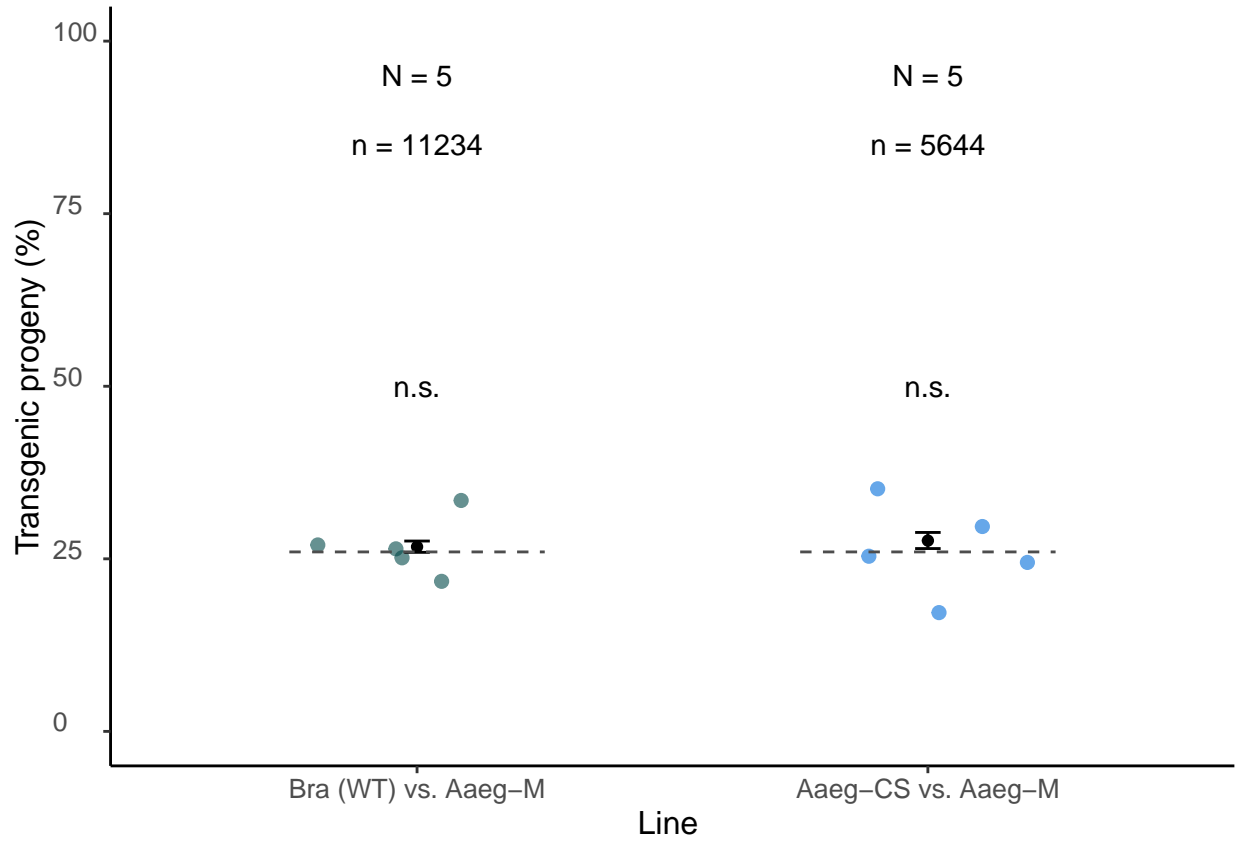



## Ae. albopictus

### Data

```
compet_albo<-read.table("data/Competitiveness_albo.csv", header=TRUE, sep=",")
compet_albo$total = compet_albo$tsg + compet_albo$no_tsg
compet_albo$comp = compet_albo$tsg / (compet_albo$total) * 100
compet_albo$line = factor(x = compet_albo$line,
                          levels = c('Expected', 'Aal-M', 'Aal-CS'))
compet_albo
```

|    | line     | Replicate | tsg | no_tsg | total | comp     |
|----|----------|-----------|-----|--------|-------|----------|
| 1  | Expected | 1         | 637 | 1863   | 2500  | 25.48000 |
| 2  | Aal-M    | 1         | 75  | 185    | 260   | 28.84615 |
| 3  | Aal-M    | 2         | 60  | 247    | 307   | 19.54397 |
| 4  | Aal-M    | 3         | 119 | 335    | 454   | 26.21145 |
| 5  | Aal-M    | 4         | 151 | 887    | 1038  | 14.54721 |
| 6  | Aal-M    | 5         | 67  | 451    | 518   | 12.93436 |
| 7  | Aal-CS   | 1         | 779 | 1405   | 2184  | 35.66850 |
| 8  | Aal-CS   | 2         | 426 | 1980   | 2406  | 17.70574 |
| 9  | Aal-CS   | 3         | 137 | 568    | 705   | 19.43262 |
| 10 | Aal-CS   | 4         | 531 | 1136   | 1667  | 31.85363 |
| 11 | Aal-CS   | 5         | 508 | 1539   | 2047  | 24.81681 |

```
compet.albo =
  rbind(
    data.frame(replicate = compet_albo[1,2],
              line = compet_albo[1,1],
              result = rep(1, compet_albo[1,3])),
    data.frame(replicate = compet_albo[1,2],
              line = compet_albo[1,1],
              result = rep(0, compet_albo[1,4])))

for(i in 2:nrow(compet_albo)){
  compet.albo =
    rbind(
      compet.albo,
      data.frame(replicate = compet_albo[i,2],
                line = compet_albo[i,1],
                result = rep(1, compet_albo[i,3])),
      data.frame(replicate = compet_albo[i,2],
                line = compet_albo[i,1],
                result = rep(0, compet_albo[i,4]))
    )
}

compet.albo$line = factor(x = compet.albo$line,
                          levels = c('Expected', 'Aal-M', 'Aal-CS'))
compet.albo$Species = "Ae. albopictus"

sum.compet.albo = compet.albo %>%
  filter(line != "Expected") %>%
  group_by(line) %>%
```

```
dplyr::summarize(value = n(),
                 N = max(replicate)) %>%
data.frame() %>%
mutate(pos = c(1,2))

head(compet.albo)
```

| replicate | line | result   | Species          |
|-----------|------|----------|------------------|
| 1         | 1    | Expected | 1 Ae. albopictus |
| 2         | 1    | Expected | 1 Ae. albopictus |
| 3         | 1    | Expected | 1 Ae. albopictus |
| 4         | 1    | Expected | 1 Ae. albopictus |
| 5         | 1    | Expected | 1 Ae. albopictus |
| 6         | 1    | Expected | 1 Ae. albopictus |

```
Expected_Aal_M = 0.255
Expected_Aal_CS = 0.255
```

Model .

```
# Generalized linear model with Bernoulli distribution
cpt.albo = glm(formula = 'result ~ line',
              family = binomial,
              data = compet.albo)
summary(cpt.albo)
```

Call:

```
glm(formula = "result ~ line", family = binomial, data = compet.albo)
```

Deviance Residuals:

| Min     | 1Q      | Median  | 3Q      | Max    |
|---------|---------|---------|---------|--------|
| -0.7835 | -0.7835 | -0.7670 | -0.6361 | 1.8425 |

Coefficients:

|             | Estimate | Std. Error | z value | Pr(> z )     |
|-------------|----------|------------|---------|--------------|
| (Intercept) | -1.07317 | 0.04590    | -23.382 | < 2e-16 ***  |
| lineAal-M   | -0.42192 | 0.06856    | -6.154  | 7.55e-10 *** |
| lineAal-CS  | 0.04939  | 0.05174    | 0.955   | 0.34         |

---

Signif. codes: 0 '\*\*\*' 0.001 '\*\*' 0.01 '\*' 0.05 '.' 0.1 ' ' 1

(Dispersion parameter for binomial family taken to be 1)

Null deviance: 15773 on 14085 degrees of freedom  
Residual deviance: 15697 on 14083 degrees of freedom  
AIC: 15703

Number of Fisher Scoring iterations: 4

```
# Pairwise comparison
cpt.albo.pred = ggpredict(cpt.albo) %>% data.frame()

cpt.albo.pred %>% dplyr::select(Line = line.x,
                               Mean = line.predicted,
                               SE = line.std.error,
                               CI.low = line.conf.low,
                               CI.high = line.conf.high)
```

|   | Line     | Mean      | SE         | CI.low    | CI.high   |
|---|----------|-----------|------------|-----------|-----------|
| 1 | Expected | 0.2548000 | 0.04589797 | 0.2380986 | 0.2722543 |
| 2 | Aal-M    | 0.1831587 | 0.05092841 | 0.1686943 | 0.1985671 |
| 3 | Aal-CS   | 0.2642913 | 0.02389280 | 0.2552868 | 0.2734967 |

Replication

|   | Line   | N | n    |
|---|--------|---|------|
| 1 | Aal-M  | 5 | 2577 |
| 2 | Aal-CS | 5 | 9009 |

Model fit quality

```
plot(cpt.albo)
```

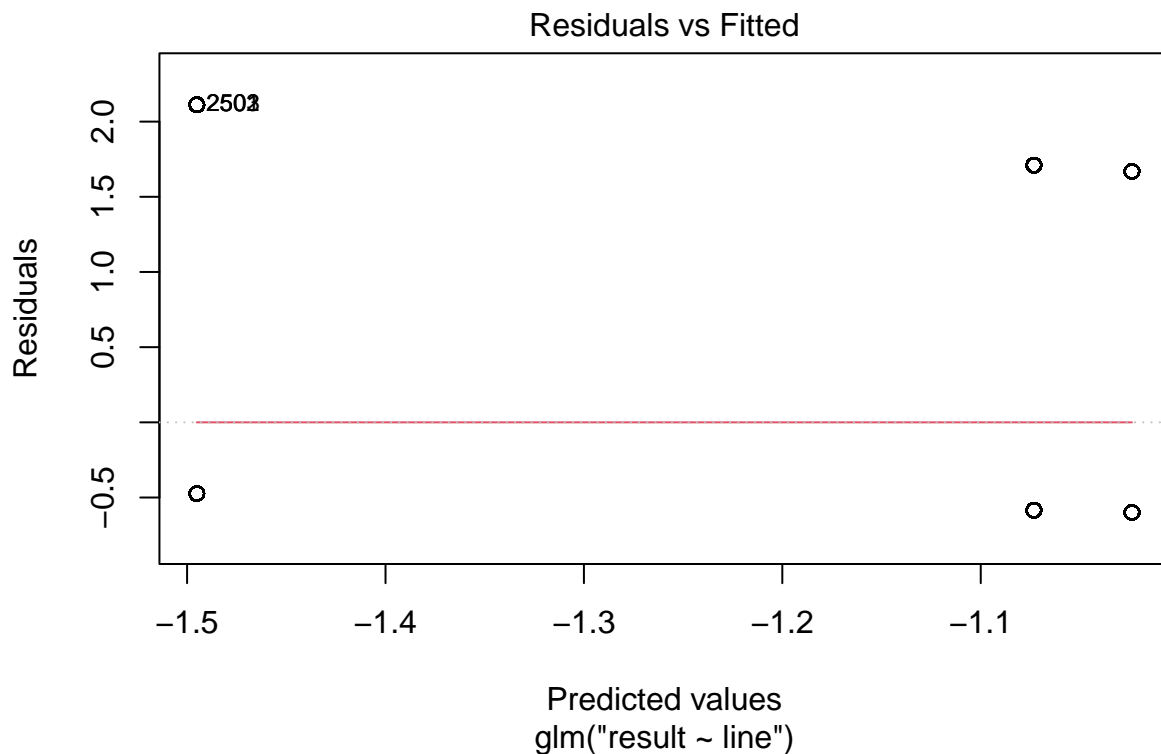

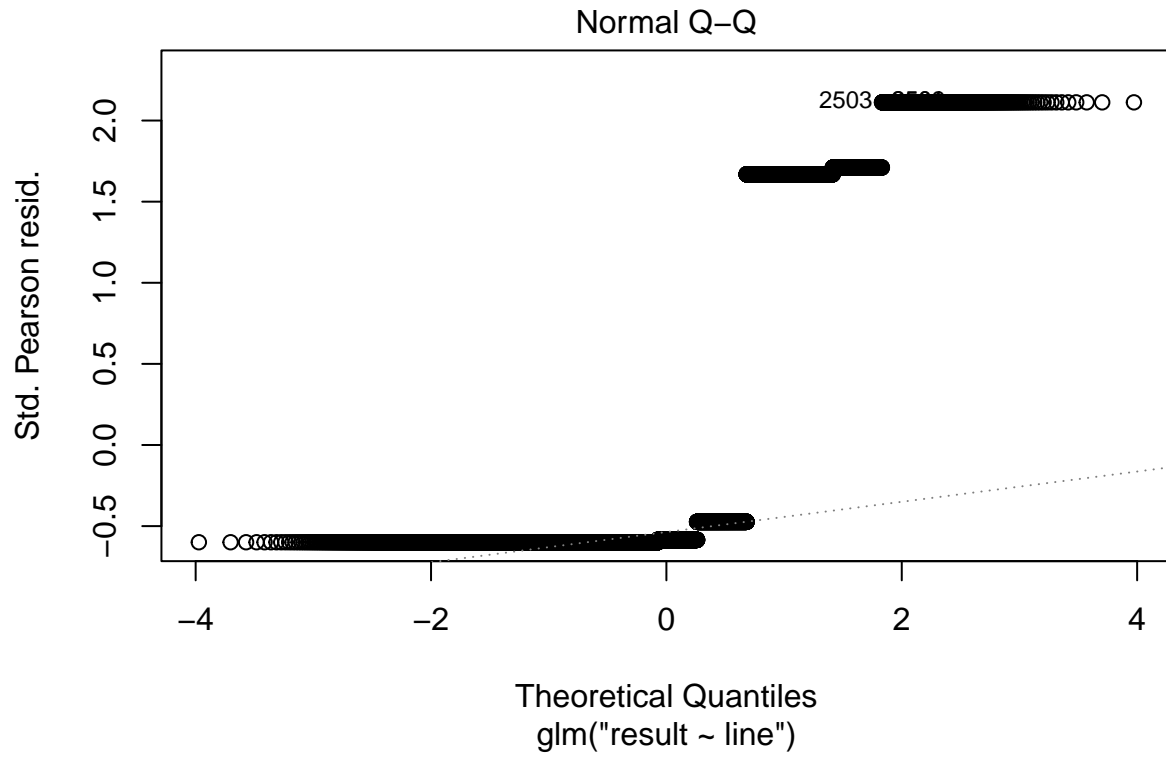

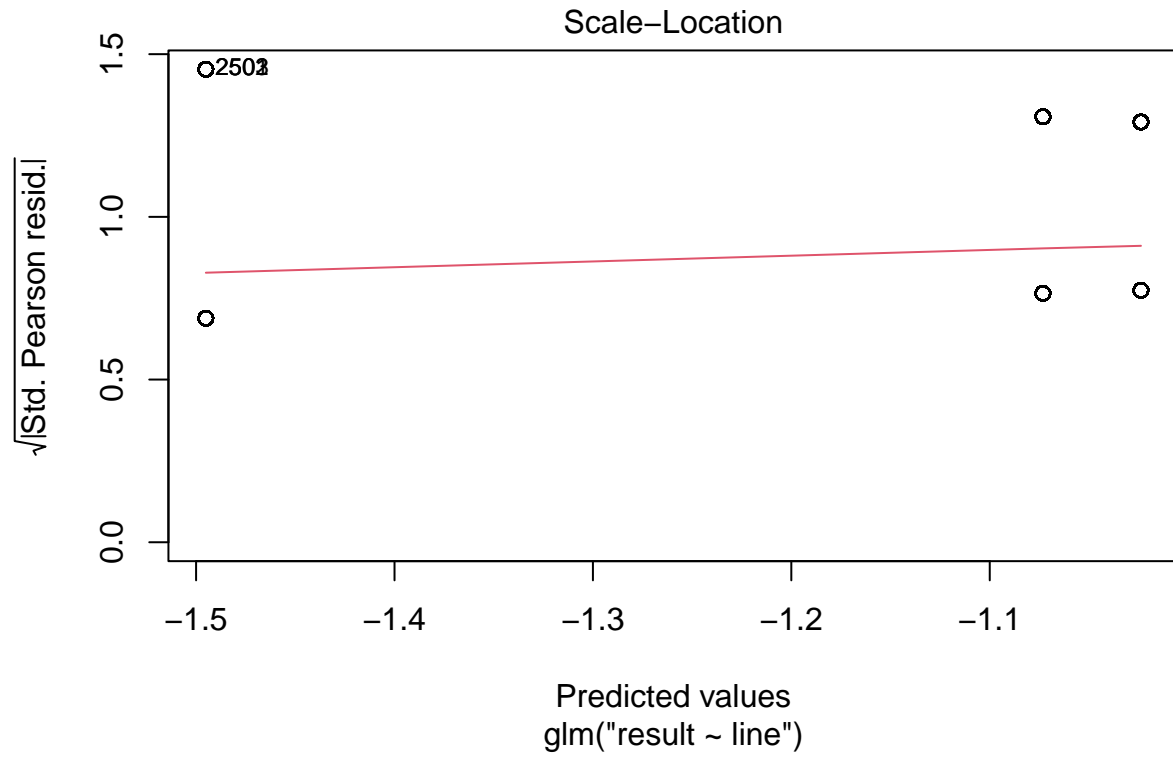

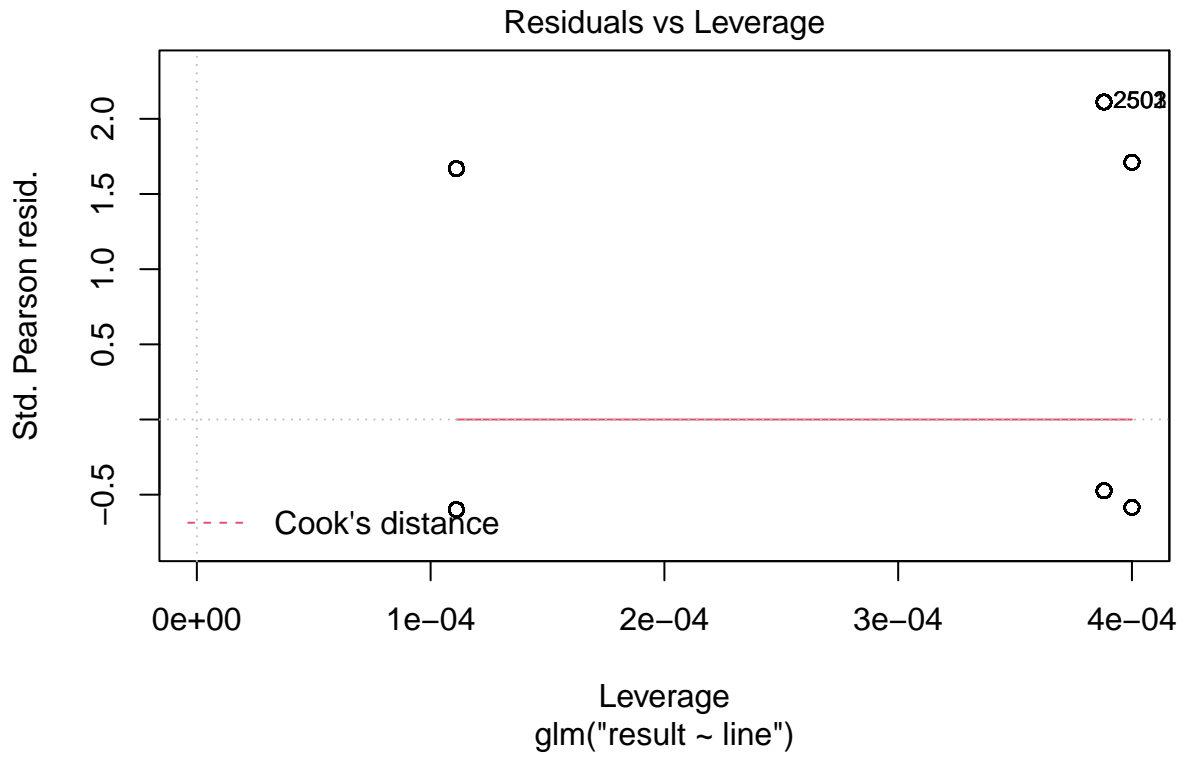

Plot .

```

comp.albo.plot =
  ggplot(data = NULL) +
  geom_point(data = compet_albo[compet_albo$line!='Expected',],
            aes(x = jitter(as.numeric(factor(line))),
                y = comp,
                color = line),
            size = 2, alpha = .6)+
  geom_point(data = cpt.albo.pred[-1,],
            aes(x = (as.numeric(line.x)-1),
                y = line.predicted * 100),
            size = 1.5,
            color = 'black') +
  geom_errorbar(data = cpt.albo.pred[-1,],
               aes(x = (as.numeric(line.x)-1),
                   ymin = line.conf.low* 100,
                   ymax = line.conf.high* 100),
               width = 0.05, color = 'black') +
  annotate(geom = 'text',
         x = sum.compet.albo$pos, y = 85,
         label = paste0('n = ', sum.compet.albo$value),
         size = 4) +
  annotate(geom = 'text',
         x = sum.compet.albo$pos, y = 95,

```

```

      label = c('N = 5', 'N = 5'),
      size = 4) +
  annotate(geom = 'line', x = c(.75, 1.25),
          y=rep(Expected_Aal_M*100, 2),
          lty = 2, color = 'grey30') +
  annotate(geom = 'line', x = c(1.75, 2.25),
          y=rep(Expected_Aal_CS*100, 2),
          lty = 2, color = 'grey30') +
  annotate(geom = 'text', x = 2, y = 50,
          label = 'n.s.',
          size = 4) +
  annotate(geom = 'text', x = 1, y = 50,
          label = '***',
          size = 4) +
  scale_x_continuous(breaks = 1:2,
                    labels = c("BiA (WT) vs. Aal-M",
                               "Aal-CS vs. Aal-M"),
                    limits = c(.5,2.5)) +
  scale_y_continuous(limits = c(0,100),
                    breaks = c(0,25,50,75,100)) +
  scale_color_manual(values = line.color.alb, labels = names(line.color.alb)) +
  labs(x = 'Line ',
       y = 'Transgenic progeny (%)') +
  theme_classic() +
  theme(legend.position = 'none',
        panel.background = element_rect(fill = 'grey'),
        axis.title.y = element_text(color = 'black',
                                     size = 12),
        axis.text.y = element_text(size = 10,
                                    hjust = 0, vjust = 0),
        axis.title.x = element_text(color = 'black',
                                     size = 12),
        axis.text.x = element_text(size = 10))
comp.albo.plot

```

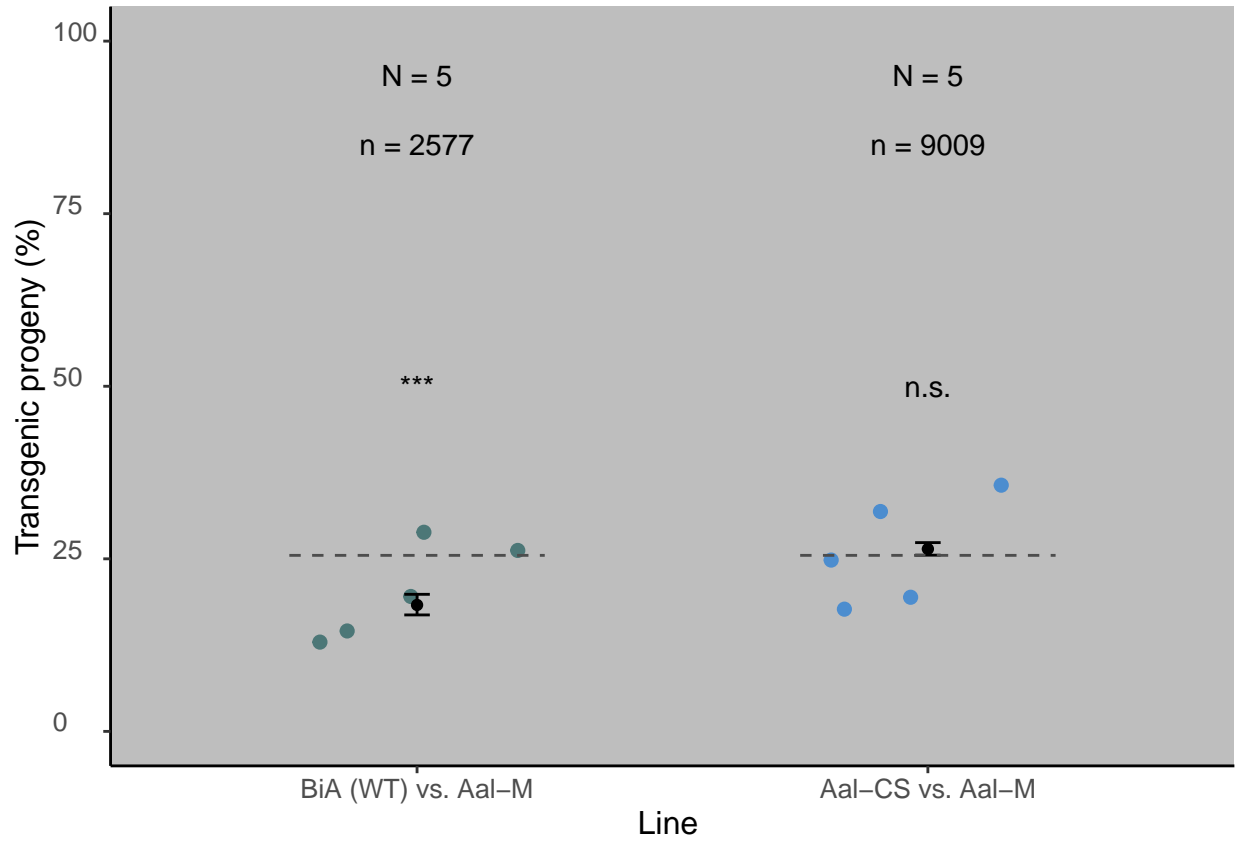



## Flight test

### Ae. aegypti

#### Data

```
flight_aegypti<-read.table("data/Flight_aeg.csv",
                           header = TRUE, sep = ";")

flight_aegypti$esc = flight_aegypti$out /
  (flight_aegypti$out + flight_aegypti$in.) * 100

flight_aegypti$Line = factor(flight_aegypti$Line,
                             levels = c("Bra (WT)", "Aaeg-M", "Aaeg-CS"))

flight_aegypti
```

|   | Replicate | Line     | out | in. | esc      |
|---|-----------|----------|-----|-----|----------|
| 1 | 2         | Aaeg-M   | 65  | 36  | 64.35644 |
| 2 | 2         | Aaeg-CS  | 66  | 36  | 64.70588 |
| 3 | 2         | Bra (WT) | 71  | 22  | 76.34409 |
| 4 | 3         | Aaeg-M   | 57  | 31  | 64.77273 |
| 5 | 3         | Aaeg-CS  | 75  | 19  | 79.78723 |
| 6 | 3         | Bra (WT) | 64  | 35  | 64.64646 |
| 7 | 4         | Aaeg-M   | 76  | 21  | 78.35052 |
| 8 | 4         | Aaeg-CS  | 79  | 27  | 74.52830 |
| 9 | 4         | Bra (WT) | 78  | 19  | 80.41237 |

```
flight.aeg =
  rbind(
    data.frame(replicate = flight_aegypti[1,1],
              treatment = flight_aegypti[1,2],
              result = rep(1, flight_aegypti[1,3])),
    data.frame(replicate = flight_aegypti[1,1],
              treatment = flight_aegypti[1,2],
              result = rep(0, flight_aegypti[1,4])))

for(i in 2:nrow(flight_aegypti)){
  flight.aeg =
    rbind(
      flight.aeg,
      data.frame(replicate = flight_aegypti[i,1],
                treatment = flight_aegypti[i,2],
                result = rep(1, flight_aegypti[i,3])),
      data.frame(replicate = flight_aegypti[i,1],
                treatment = flight_aegypti[i,2],
                result = rep(0, flight_aegypti[i,4]))
    )
}

flight.aeg$Species = 'Ae. aegypti'
flight.aeg$treatment = factor(flight.aeg$treatment,
                              levels = c("Bra (WT)", "Aaeg-M", "Aaeg-CS"))
```

```
head(flight.aeg)
```

```
  replicate treatment result   Species
1         2   Aaeg-M         1 Ae. aegypti
2         2   Aaeg-M         1 Ae. aegypti
3         2   Aaeg-M         1 Ae. aegypti
4         2   Aaeg-M         1 Ae. aegypti
5         2   Aaeg-M         1 Ae. aegypti
6         2   Aaeg-M         1 Ae. aegypti
```

```
flight.aeg.summary = flight.aeg %>% group_by(treatment) %>%
  dplyr::summarise(value = n()) %>% data.frame() %>%
  mutate(pos = 1:3)
```

```
head(flight.aeg.summary)
```

```
  treatment value pos
1 Bra (WT)    289   1
2   Aaeg-M    286   2
3   Aaeg-CS    302   3
```

Model .

```
flight.aeg.glmer = glmer(formula = 'result ~ treatment + (1|replicate)',
  data = flight.aeg, family = binomial)
```

```
summary(flight.aeg.glmer)
```

```
Generalized linear mixed model fit by maximum likelihood (Laplace
Approximation) [glmerMod]
Family: binomial ( logit )
Formula: result ~ treatment + (1 | replicate)
Data: flight.aeg
```

```
      AIC      BIC  logLik deviance df.resid
1045.4  1064.5  -518.7  1037.4     873
```

Scaled residuals:

```
      Min      1Q  Median      3Q      Max
-1.8340 -1.4218  0.6088  0.6315  0.7033
```

Random effects:

```
Groups   Name          Variance Std.Dev.
replicate (Intercept) 0.02668  0.1633
Number of obs: 877, groups: replicate, 3
```

Fixed effects:

```
              Estimate Std. Error z value Pr(>|z|)
(Intercept)    1.03584    0.16391   6.320 2.62e-10 ***
treatmentAaeg-M -0.22027    0.18562  -1.187   0.235
treatmentAaeg-CS -0.04688    0.18647  -0.251   0.801
```

```
---
Signif. codes:  0 '***' 0.001 '**' 0.01 '*' 0.05 '.' 0.1 ' ' 1
```

Correlation of Fixed Effects:

```
(Intr) trtA-M
tretmntAg-M -0.590
trtmntAg-CS -0.587  0.519
```

```
pairwise.f.aeg = glht(flight.aeg.glmer,
                      mcp(treatment="Tukey"))
summary(pairwise.f.aeg)
```

### Simultaneous Tests for General Linear Hypotheses

Multiple Comparisons of Means: Tukey Contrasts

```
Fit: glmer(formula = result ~ treatment + (1 | replicate), data = flight.aeg,
           family = binomial)
```

Linear Hypotheses:

|                         | Estimate | Std. Error | z value | Pr(> z ) |
|-------------------------|----------|------------|---------|----------|
| Aaeg-M - Bra (WT) == 0  | -0.22027 | 0.18562    | -1.187  | 0.461    |
| Aaeg-CS - Bra (WT) == 0 | -0.04688 | 0.18647    | -0.251  | 0.966    |
| Aaeg-CS - Aaeg-M == 0   | 0.17340  | 0.18254    | 0.950   | 0.609    |

(Adjusted p values reported -- single-step method)

Replication

```
# A tibble: 3 x 3
  Line      N      n
  <fct> <int> <int>
1 Bra (WT)     3   289
2 Aaeg-M       3   286
3 Aaeg-CS      3   302
```

Model fit quality

```
check_model(flight.aeg.glmer)
```

### Posterior Predictive Check

Model-predicted lines should resemble observed c

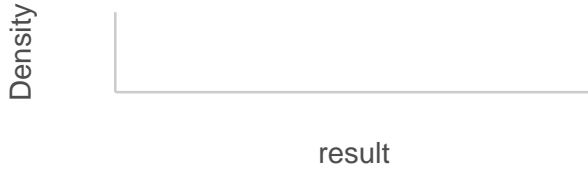

### Binned Residuals

Points should be within error bounds

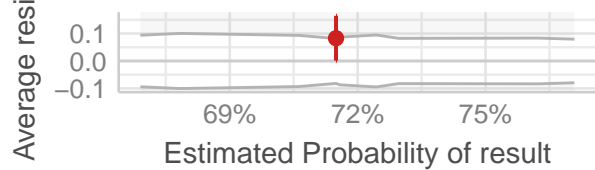

Within error bounds — no — yes

### Influential Observations

Points should be inside the contour lines

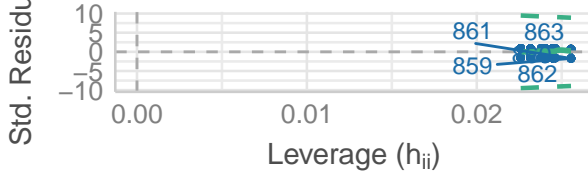

### Normality of Residuals

Points should fall along the line

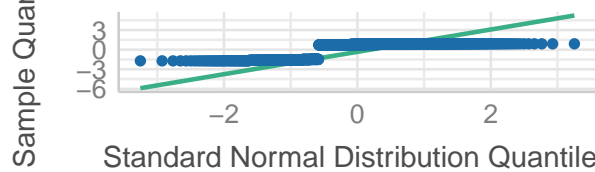

### Normality of Random Effects (replicate)

Points should be plotted along the line

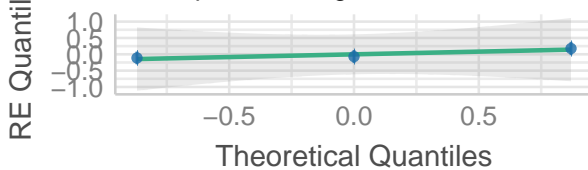

### Plot

```
ft.aeg = data.frame(ggpredict(model = flight.aeg.glm,
                             terms = c("treatment")))
ft.aeg$x = factor(ft.aeg$x,
                 levels = c("Bra (WT)", "Aaeg-M", "Aaeg-CS"))
ft.aeg$Species = 'Ae. aegypti'

ft.plot.aeg =
  ggplot(data = NULL) +
  geom_point(data = flight_aegypti,
            aes(x = jitter(as.numeric(factor(Line))),
                y = esc,
                color = Line),
            size = 2, alpha = .6) +
  geom_point(data = ft.aeg,
            aes(x = as.numeric(x),
                y = predicted * 100),
            size = 1.5, color = 'black') +
  geom_errorbar(data = ft.aeg,
               aes(x = as.numeric(x),
                   ymin = conf.low * 100,
                   ymax = conf.high * 100,
                   width = 0.05, color = 'black') +
  annotate(geom = 'text',
```

```

      x = flight.aeg.summary$pos, y = 5,
      label = paste0('n = ', flight.aeg.summary$value),
      size = 4) +
annotate(geom = 'text',
      x = flight.aeg.summary$pos, y = 15,
      label = 'N = 3',
      size = 4) +
annotate(geom = 'line', x = 1:3, y = 125) +
annotate(geom = 'text', x = 2, y = 132,
      label = 'n.s.',
      size = 4) +
annotate(geom = 'line', x = 1:2, y = 108) +
annotate(geom = 'text', x = 1.5, y = 115,
      label = 'n.s.',
      size = 4) +
scale_x_continuous(breaks = 1:3,
      labels = c("Bra (WT)",
                 "Aaeg-M",
                 "Aaeg-CS"),
      limits = c(.5,3.5)) +
scale_y_continuous(breaks = c(0,25,50,75,100)) +
scale_color_manual(values = line.color.aeg, labels = names(line.color.aeg)) +
coord_cartesian(clip = 'off', ylim = c(0,100))+
labs(x = 'Line',
      y = 'Escaped males (%)') +
theme_classic() +
theme(legend.position = 'none',
      plot.margin = unit(c(1.5,0,0,0), 'cm'),
      axis.title.y = element_text(color = 'black',
                                   size = 12),
      axis.text.y = element_text(size = 11,
                                   hjust = 0, vjust = 0),
      axis.title.x = element_text(color = 'black',
                                   size = 12),
      axis.text.x = element_text(size = 11))
ft.plot.aeg

```

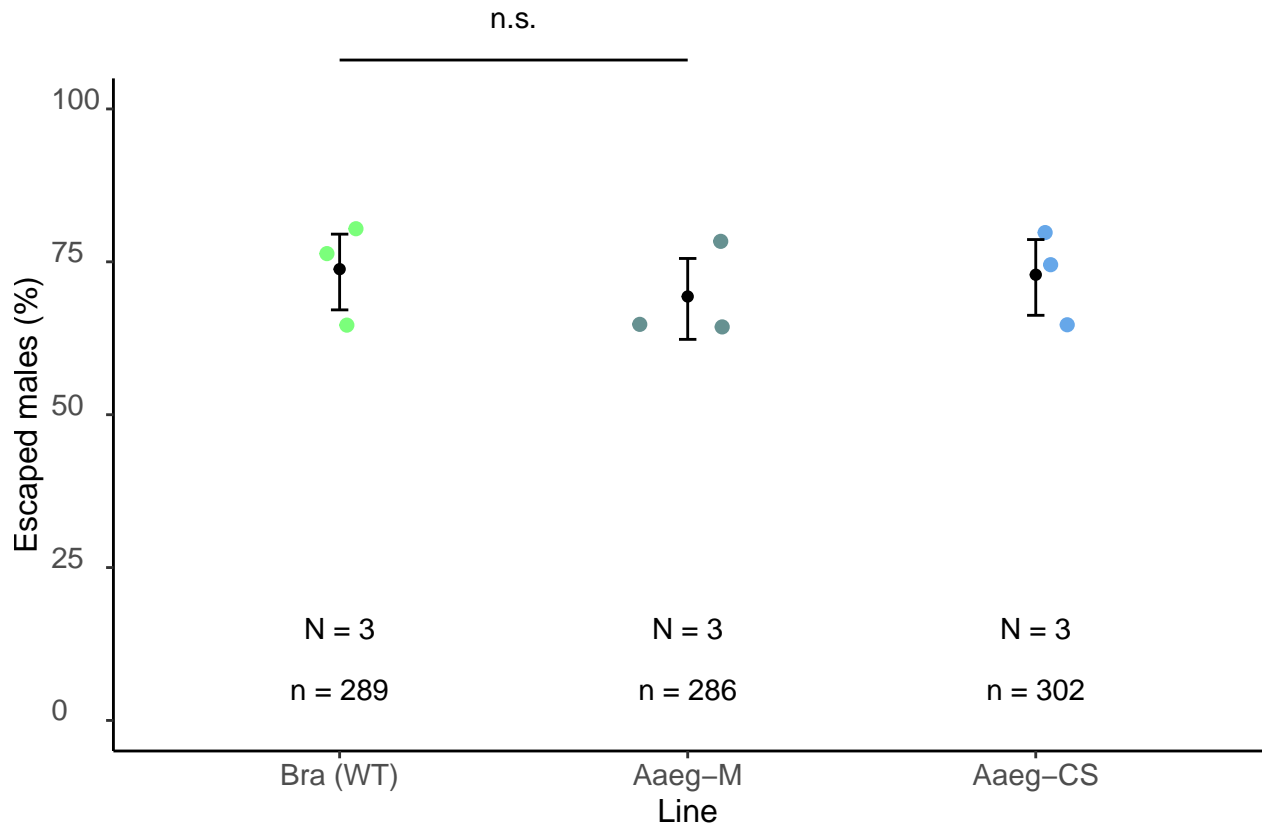

## Ae. albopictus

### Data

```
flight_albo<-read.table("data/Flight_albo.csv",
                        header = TRUE, sep = ";")

flight_albo$esc = flight_albo$out / (flight_albo$out + flight_albo$in.) * 100

flight_albo$Line = factor(flight_albo$Line,
                          levels = c("BiA (WT)", "Aal-M", "Aal-CS"))

head(flight_albo)
```

| Replicate | Line | out      | in.   | esc      |
|-----------|------|----------|-------|----------|
| 1         | 2    | Aal-M    | 26 63 | 29.21348 |
| 2         | 2    | Aal-CS   | 45 48 | 48.38710 |
| 3         | 2    | BiA (WT) | 38 48 | 44.18605 |
| 4         | 3    | Aal-M    | 57 31 | 64.77273 |
| 5         | 3    | Aal-CS   | 62 16 | 79.48718 |
| 6         | 3    | BiA (WT) | 58 31 | 65.16854 |

```
flight.albo =
  rbind(
    data.frame(replicate = flight_albo[1,1],
              treatment = flight_albo[1,2],
              result = rep(1, flight_albo[1,3])),
    data.frame(replicate = flight_albo[1,1],
              treatment = flight_albo[1,2],
              result = rep(0, flight_albo[1,4])))

for(i in 2:nrow(flight_albo)){
  flight.albo =
    rbind(
      flight.albo,
      data.frame(replicate = flight_albo[i,1],
                treatment = flight_albo[i,2],
                result = rep(1, flight_albo[i,3])),
      data.frame(replicate = flight_albo[i,1],
                treatment = flight_albo[i,2],
                result = rep(0, flight_albo[i,4]))
    )
}

flight.albo$Species = 'Ae. albopictus'
flight.albo$treatment = factor(flight.albo$treatment,
                               levels = c("BiA (WT)", "Aal-M", "Aal-CS"))

head(flight.albo)
```

| replicate | treatment | result | Species          |
|-----------|-----------|--------|------------------|
| 1         | 2         | Aal-M  | 1 Ae. albopictus |
| 2         | 2         | Aal-M  | 1 Ae. albopictus |

```

3      2      Aal-M      1 Ae. albopictus
4      2      Aal-M      1 Ae. albopictus
5      2      Aal-M      1 Ae. albopictus
6      2      Aal-M      1 Ae. albopictus

```

```

flight.alb.summary = flight.albo %>% group_by(treatment) %>%
  dplyr::summarise(value = n()) %>% data.frame() %>%
  mutate(pos = 1:3)

head(flight.alb.summary)

```

```

  treatment value pos
1 BiA (WT)   264   1
2   Aal-M   273   2
3   Aal-CS   244   3

```

## Model .

```

mod.glmer.albo = glmer(formula = 'result ~ treatment + (1|replicate)',
  data = flight.albo, family = binomial)

summary(mod.glmer.albo)

```

```

Generalized linear mixed model fit by maximum likelihood (Laplace
Approximation) [glmerMod]
Family: binomial ( logit )
Formula: result ~ treatment + (1 | replicate)
Data: flight.albo

```

```

      AIC      BIC  logLik deviance df.resid
1036.3  1054.9  -514.1  1028.3     777

```

### Scaled residuals:

```

      Min      1Q  Median      3Q      Max
-1.7839 -0.9200  0.5606  0.9063  1.4280

```

### Random effects:

```

Groups   Name             Variance Std.Dev.
replicate (Intercept) 0.2407   0.4906
Number of obs: 781, groups: replicate, 3

```

### Fixed effects:

```

              Estimate Std. Error z value Pr(>|z|)
(Intercept)    0.2196    0.3106   0.707   0.4795
treatmentAal-M -0.3636    0.1784  -2.038   0.0415 *
treatmentAal-CS  0.3490    0.1867   1.869   0.0616 .
---

```

```

Signif. codes:  0 '***' 0.001 '**' 0.01 '*' 0.05 '.' 0.1 ' ' 1

```

### Correlation of Fixed Effects:

```

      (Intr) trtA-M
trtmntAl-M -0.293
trtmntAl-CS -0.279  0.485

```



```

pairewise.f.albo = glht(mod.glmer.albo,
                        mcp(treatment="Tukey"))

summary(pairewise.f.albo)

```

### Simultaneous Tests for General Linear Hypotheses

Multiple Comparisons of Means: Tukey Contrasts

```

Fit: glmer(formula = result ~ treatment + (1 | replicate), data = flight.albo,
            family = binomial)

```

Linear Hypotheses:

|                        | Estimate | Std. Error | z value | Pr(> z )     |
|------------------------|----------|------------|---------|--------------|
| Aal-M - BiA (WT) == 0  | -0.3636  | 0.1784     | -2.038  | 0.103122     |
| Aal-CS - BiA (WT) == 0 | 0.3490   | 0.1867     | 1.869   | 0.147542     |
| Aal-CS - Aal-M == 0    | 0.7126   | 0.1854     | 3.842   | 0.000341 *** |

---

Signif. codes: 0 '\*\*\*' 0.001 '\*\*' 0.01 '\*' 0.05 '.' 0.1 ' ' 1  
(Adjusted p values reported -- single-step method)

Replication

```

# A tibble: 3 x 3
  Line      N      n
  <fct> <int> <int>
1 BiA (WT)     3    264
2 Aal-M         3    273
3 Aal-CS         3    244

```

Model fit quality

```

check_model(mod.glmer.albo)

```

### Posterior Predictive Check

Model-predicted lines should resemble observed

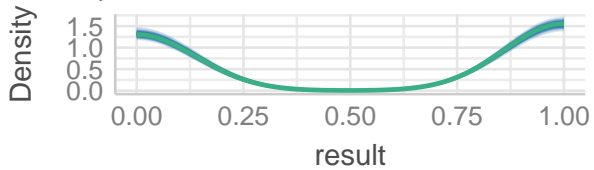

### Binned Residuals

Points should be within error bounds

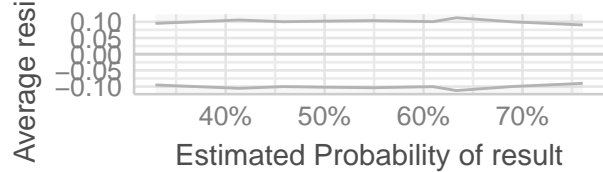

redicted data — Observed data — Observed data

### Influential Observations

Points should be inside the contour lines

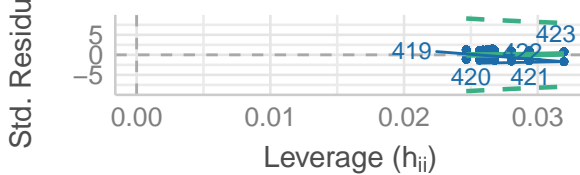

### Normality of Residuals

Points should fall along the line

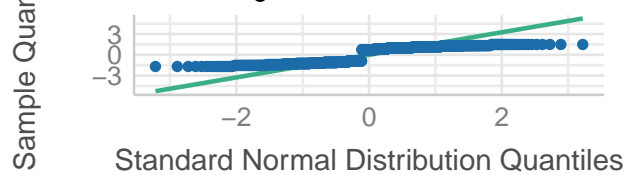

### Normality of Random Effects (replicate)

Points should be plotted along the line

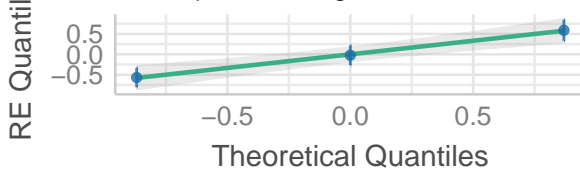

Plot .

```
ft.albo = data.frame(ggpredict(model = mod.glmr.albo, terms = c("treatment")))
ft.albo$Species = 'Ae. albopictus'
```

```
ft.plot.alb =
  ggplot(data = NULL) +
  geom_point(data = flight_albo,
            aes(x = jitter(as.numeric(factor(Line))),
                y = esc, color = Line),
            size = 2, alpha = .6) +
  geom_point(data = ft.albo,
            aes(x = as.numeric(x),
                y = predicted * 100),
            size = 1.5, color = 'black') +
  geom_errorbar(data = ft.albo,
               aes(x = as.numeric(x),
                   ymin = conf.low * 100,
                   ymax = conf.high * 100),
               width = 0.05, color = 'black') +
  annotate(geom = 'text',
         x = flight.alb.summary$pos, y = 5,
         label = paste0('n = ', flight.alb.summary$value),
         size = 4) +
  annotate(geom = 'text',
```

```

      x = flight.alb.summary$pos, y = 15,
      label = 'N = 3',
      size = 4) +
  annotate(geom = 'line', x = 1:3, y = 125) +
  annotate(geom = 'text', x = 2, y = 132,
          label = 'n.s.',
          size = 4) +
  annotate(geom = 'line', x = 1:2, y = 108) +
  annotate(geom = 'text', x = 1.5, y = 115,
          label = 'n.s.',
          size = 4) +
  scale_x_continuous(breaks = 1:3,
                    labels = c("BiA (WT)",
                               "Aal-M",
                               "Aal-CS"),
                    limits = c(.5,3.5)) +
  scale_y_continuous(breaks = c(0,25,50,75,100)) +
  coord_cartesian(clip = 'off', ylim = c(0,100)) +
  scale_color_manual(values = line.color.alb,
                    labels = names(line.color.alb)) +
  labs(x = 'Line',
       y = 'Escaped males (%)') +
  theme_classic() +
  theme(legend.position = 'none',
        plot.margin = unit(c(1.5,0,0,0), 'cm'),
        axis.title.y = element_text(color = 'black',
                                     size = 12),
        axis.text.y = element_text(size = 11,
                                    hjust = 0, vjust = 0),
        axis.title.x = element_text(color = 'black',
                                    size = 12),
        axis.text.x = element_text(size = 11),
        panel.background = element_rect(fill = 'grey'))
ft.plot.alb

```

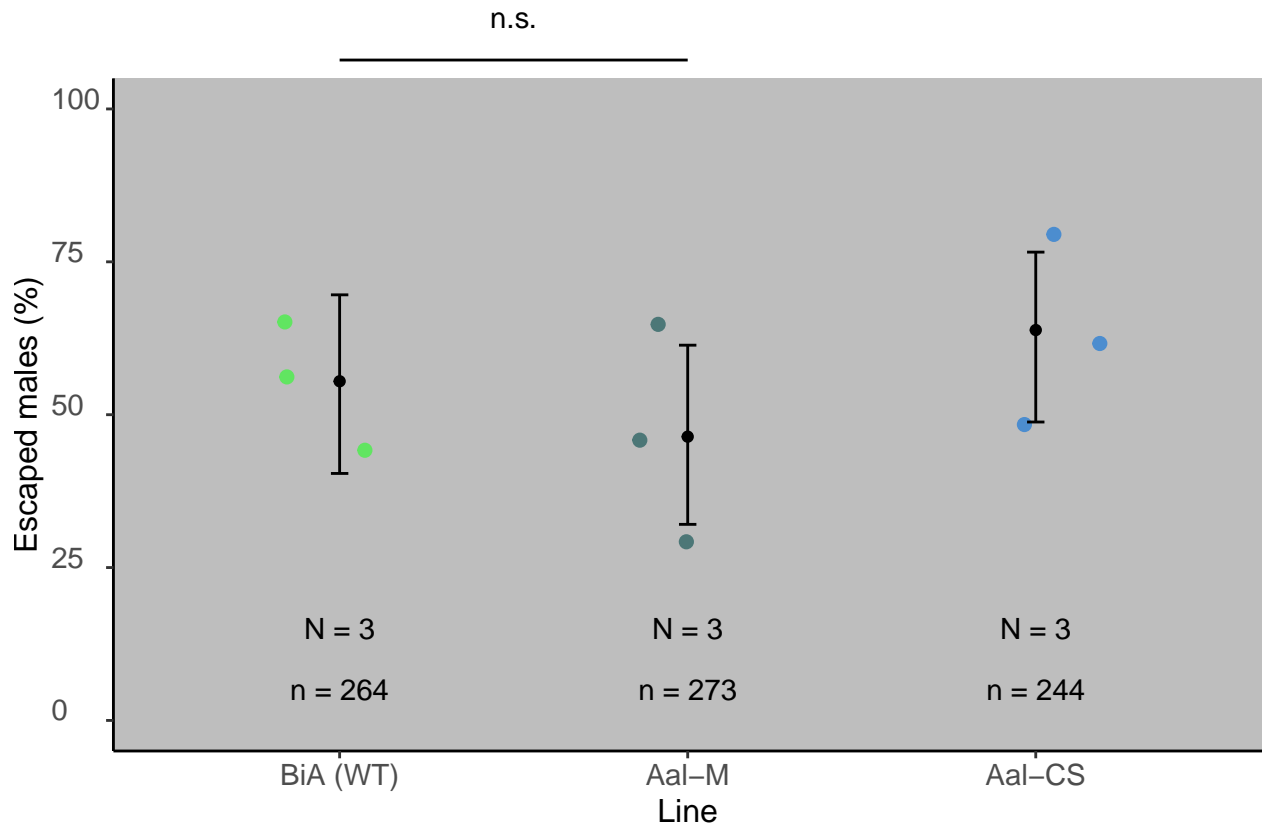

## Adult survival

### Ae. aegypti

#### Data

```
data_aeg <- read.table("data/Survival_aeg.txt", h = T)
data_aeg$Line[data_aeg$Line=='Bra-(WT)'] = 'Bra (WT)'
data_aeg$Line = factor(data_aeg$Line,
                       levels = c('Bra (WT)', 'Aeg-M', 'Aeg-CS'))

data_aeg |> dplyr::select(-(3:5))
```

|    | Replicate | Line     | male_adults | D1 | D2 | D3 | D4 | D5 | D6 | D7 | D8 | D9 | D10 | D11 | D12 | D13 |
|----|-----------|----------|-------------|----|----|----|----|----|----|----|----|----|-----|-----|-----|-----|
| 1  | 1         | Aaeg-M   | 87          | 0  | 0  | 0  | 0  | 0  | 0  | 0  | 0  | 0  | 0   | 0   | 0   | 0   |
| 2  | 2         | Aaeg-M   | 82          | 0  | 0  | 0  | 0  | 0  | 0  | 0  | 0  | 0  | 0   | 0   | 0   | 0   |
| 3  | 3         | Aaeg-M   | 93          | 1  | 0  | 0  | 0  | 1  | 0  | 0  | 0  | 0  | 0   | 0   | 0   | 0   |
| 4  | 4         | Aaeg-M   | 73          | 0  | 0  | 0  | 0  | 0  | 0  | 0  | 1  | 0  | 0   | 0   | 0   | 0   |
| 5  | 1         | Bra (WT) | 82          | 0  | 0  | 0  | 0  | 0  | 0  | 0  | 0  | 0  | 0   | 0   | 0   | 1   |
| 6  | 2         | Bra (WT) | 97          | 0  | 0  | 0  | 0  | 2  | 0  | 0  | 0  | 0  | 0   | 0   | 0   | 0   |
| 7  | 3         | Bra (WT) | 90          | 0  | 1  | 0  | 0  | 0  | 0  | 0  | 0  | 0  | 1   | 0   | 0   | 0   |
| 8  | 4         | Bra (WT) | 102         | 0  | 1  | 0  | 0  | 0  | 0  | 0  | 0  | 0  | 1   | 0   | 0   | 0   |
| 9  | 5         | Bra (WT) | 105         | 2  | 0  | 0  | 0  | 0  | 1  | 1  | 0  | 0  | 0   | 0   | 1   | 0   |
| 10 | 6         | Bra (WT) | 105         | 3  | 0  | 0  | 0  | 2  | 0  | 0  | 0  | 0  | 0   | 0   | 0   | 0   |
| 11 | 7         | Bra (WT) | 105         | 0  | 0  | 0  | 0  | 0  | 0  | 0  | 0  | 0  | 0   | 0   | 0   | 1   |
| 12 | 8         | Bra (WT) | 105         | 0  | 0  | 0  | 0  | 0  | 0  | 1  | 0  | 0  | 0   | 0   | 0   | 0   |
| 13 | 5         | Aaeg-M   | 105         | 1  | 0  | 0  | 0  | 0  | 0  | 0  | 0  | 0  | 0   | 0   | 0   | 0   |
| 14 | 6         | Aaeg-M   | 105         | 2  | 1  | 0  | 0  | 0  | 0  | 0  | 0  | 0  | 0   | 0   | 0   | 0   |
| 15 | 7         | Aaeg-M   | 105         | 1  | 0  | 0  | 0  | 0  | 0  | 2  | 0  | 0  | 0   | 1   | 0   | 0   |
| 16 | 8         | Aaeg-M   | 105         | 0  | 0  | 0  | 0  | 1  | 0  | 0  | 2  | 0  | 0   | 0   | 0   | 0   |
| 17 | 1         | Aaeg-CS  | 105         | 0  | 0  | 0  | 0  | 0  | 0  | 0  | 0  | 0  | 0   | 1   | 0   | 0   |
| 18 | 2         | Aaeg-CS  | 105         | 0  | 1  | 0  | 0  | 0  | 0  | 0  | 0  | 0  | 0   | 0   | 0   | 0   |
| 19 | 3         | Aaeg-CS  | 105         | 0  | 0  | 0  | 0  | 1  | 0  | 0  | 0  | 0  | 0   | 0   | 0   | 0   |
| 20 | 4         | Aaeg-CS  | 105         | 0  | 1  | 0  | 0  | 0  | 0  | 0  | 0  | 0  | 0   | 0   | 0   | 0   |
|    | D14       |          |             |    |    |    |    |    |    |    |    |    |     |     |     |     |
| 1  |           |          | 0           |    |    |    |    |    |    |    |    |    |     |     |     |     |
| 2  |           |          | 0           |    |    |    |    |    |    |    |    |    |     |     |     |     |
| 3  |           |          | 0           |    |    |    |    |    |    |    |    |    |     |     |     |     |
| 4  |           |          | 1           |    |    |    |    |    |    |    |    |    |     |     |     |     |
| 5  |           |          | 0           |    |    |    |    |    |    |    |    |    |     |     |     |     |
| 6  |           |          | 0           |    |    |    |    |    |    |    |    |    |     |     |     |     |
| 7  |           |          | 0           |    |    |    |    |    |    |    |    |    |     |     |     |     |
| 8  |           |          | 0           |    |    |    |    |    |    |    |    |    |     |     |     |     |
| 9  |           |          | 0           |    |    |    |    |    |    |    |    |    |     |     |     |     |
| 10 |           |          | 0           |    |    |    |    |    |    |    |    |    |     |     |     |     |
| 11 |           |          | 0           |    |    |    |    |    |    |    |    |    |     |     |     |     |
| 12 |           |          | 0           |    |    |    |    |    |    |    |    |    |     |     |     |     |
| 13 |           |          | 0           |    |    |    |    |    |    |    |    |    |     |     |     |     |
| 14 |           |          | 0           |    |    |    |    |    |    |    |    |    |     |     |     |     |
| 15 |           |          | 0           |    |    |    |    |    |    |    |    |    |     |     |     |     |
| 16 |           |          | 0           |    |    |    |    |    |    |    |    |    |     |     |     |     |
| 17 |           |          | 0           |    |    |    |    |    |    |    |    |    |     |     |     |     |
| 18 |           |          | 1           |    |    |    |    |    |    |    |    |    |     |     |     |     |
| 19 |           |          | 0           |    |    |    |    |    |    |    |    |    |     |     |     |     |

```

# First, melt the data.frame
data1 <- melt(data_aeg ,
              .(Replicate,Line, larvae, adults, larval_deaths, male_adults))

# Transform days in numbers
data1$variable <- as.numeric(str_replace(data1$variable, "D",""))

#Sort by Line, Replicate and variable.
data2 <- arrange(data1, Line, Replicate, variable )
event <- subset(data2, value>0)

dat <- NULL
temporary_event <- NULL
for (i in 1:nrow(event)) {
  N <- event[i, "value"]
  dat <- data.frame(Replicate=rep(event[i,"Replicate"],N) ,Line=rep(event[i,"Line"],N) ,larvae=rep(event[i,"larvae"],N) ,adults=rep(event[i,"adults"],N) ,larval_deaths=rep(event[i,"larval_deaths"],N) ,male_adults=rep(event[i,"male_adults"],N) ,Day=rep(event[i,"Day"],N) ,Event=rep(event[i,"Event"],N))

  temporary_event <- rbind(temporary_event ,dat)
}

dat <- data.frame(Replicate = 1, Line = "Aaeg-M", larvae = 100,
                 adults = 87, larval_deaths = 13,
                 male_adults = 87, Day = 14, Event = 0)
dat1 <- data.frame(Replicate = 2, Line = "Aaeg-M", larvae = 100,
                  adults = 82, larval_deaths = 18,
                  male_adults = 82, Day = 14, Event = 0)

temporary_event <- rbind(temporary_event, dat, dat1)

# Add the censored values.
censored <- unique(ddply(temporary_event,
                        .(Replicate,Line,larvae,adults,
                          larval_deaths,male_adults),
                        summarise,
                          variable = Day,
                          Event = sum(Event),
                          Censored = (male_adults-Event))[, -7])
censored$variable <- max(data2$variable)

dat <- NULL
temporary <- NULL
for (i in 1:nrow(censored)) {
  N <- censored[i, "Censored"]
  dat <- data.frame(Replicate = rep(censored[i,"Replicate"],N),
                    Line = rep(censored[i,"Line"],N),
                    larvae = rep(censored[i,"larvae"],N),
                    adults = rep(censored[i,"adults"],N),
                    larval_deaths = rep(censored[i,"larval_deaths"],N),
                    male_adults = rep(censored[i,"male_adults"],N),
                    Day = rep(censored[i,"variable"],N),
                    Event = rep(0,N) )
}

```

```

temporary <- rbind(temporary,dat )
}

data_surv <- rbind(temporary_event, temporary)
data_surv <- arrange(data_surv, Line,Replicate,desc(Event),Day)

SurvObj <- with(data_surv, Surv(Day, Event))

```

## Model .

```

my.KMest <- survfit(SurvObj ~ Line , conf.int = 0.95, data = data_surv)
summary(my.KMest)

```

Call: survfit(formula = SurvObj ~ Line, data = data\_surv, conf.int = 0.95)

```

                Line=Bra (WT)
time n.risk n.event survival std.err lower 95% CI upper 95% CI
  1    791     5    0.994 0.00282    0.988    0.999
  2    786     2    0.991 0.00333    0.985    0.998
  5    784     4    0.986 0.00416    0.978    0.994
  6    780     1    0.985 0.00435    0.976    0.993
  7    779     2    0.982 0.00469    0.973    0.992
 10    777     2    0.980 0.00501    0.970    0.990
 12    775     1    0.979 0.00516    0.968    0.989
 13    774     2    0.976 0.00544    0.965    0.987

```

```

                Line=Aaeg-M
time n.risk n.event survival std.err lower 95% CI upper 95% CI
  1    757     5    0.993 0.00294    0.988    0.999
  2    752     1    0.992 0.00322    0.986    0.998
  5    751     2    0.989 0.00372    0.982    0.997
  7    749     2    0.987 0.00415    0.979    0.995
  8    747     3    0.983 0.00472    0.974    0.992
 11    744     1    0.982 0.00490    0.972    0.991
 14    743     1    0.980 0.00507    0.970    0.990

```

```

                Line=Aaeg-CS
time n.risk n.event survival std.err lower 95% CI upper 95% CI
  2    420     2    0.995 0.00336    0.989    1.000
  5    418     1    0.993 0.00411    0.985    1.000
 11    417     1    0.990 0.00474    0.981    1.000
 14    416     1    0.988 0.00529    0.978    0.999

```

```

df = data.frame(t = my.KMest$time,
               nb.rk = my.KMest$n.risk,
               line = c(rep(names(my.KMest$strata[1]),
                           my.KMest$strata[1]),
                       rep(names(my.KMest$strata[2]),
                           my.KMest$strata[2]),
                       rep(names(my.KMest$strata[3]),
                           my.KMest$strata[3])))
)

```

```

# df$t[df$line == 'Line=MyriaF' & df$t==4] = 7
df$t[df$line == 'Line=Aeg-CS' & df$t==5] = 7
# df$t[df$line == 'Line=MyriaF' & df$t==3] = 1
df$t[df$line == 'Line=Aeg-CS' & df$t==2] = 1

# Test differences of survival at 7 and 14 days
data_aeg.sum =
  data_aeg %>%
  group_by(Line, Replicate) %>%
  dplyr::summarise(sur.7 = (male_adults -
                          (D1 + D2 + D3 + D4 + D5 + D6 + D7))/
                  male_adults,
                  sur.14 = (male_adults - (D1 + D2 + D3 + D4 + D5 +
                                             D6 + D7 + D8 + D9 + D10 +
                                             D11 + D14 + D13 + D14))/
                  male_adults)

mod.surv.7 = lm(data = data_aeg.sum,
                formula = sur.7 ~ Line)

summary(mod.surv.7)

```

Call:

```
lm(formula = sur.7 ~ Line, data = data_aeg.sum)
```

Residuals:

| Min       | 1Q        | Median   | 3Q       | Max      |
|-----------|-----------|----------|----------|----------|
| -0.030523 | -0.004965 | 0.002688 | 0.008733 | 0.017097 |

Coefficients:

|             | Estimate | Std. Error | t value | Pr(> t )   |
|-------------|----------|------------|---------|------------|
| (Intercept) | 0.982904 | 0.004902   | 200.529 | <2e-16 *** |
| LineAaeg-M  | 0.004884 | 0.006932   | 0.705   | 0.491      |
| LineAaeg-CS | 0.009954 | 0.008490   | 1.172   | 0.257      |

---

Signif. codes: 0 '\*\*\*' 0.001 '\*\*' 0.01 '\*' 0.05 '.' 0.1 ' ' 1

Residual standard error: 0.01386 on 17 degrees of freedom

Multiple R-squared: 0.07789, Adjusted R-squared: -0.0306

F-statistic: 0.7179 on 2 and 17 DF, p-value: 0.502

```
TukeyHSD(aov(mod.surv.7))
```

Tukey multiple comparisons of means  
95% family-wise confidence level

```
Fit: aov(formula = mod.surv.7)
```

\$Line

|                 | diff        | lwr         | upr        | p adj     |
|-----------------|-------------|-------------|------------|-----------|
| Aaeg-M-Bra (WT) | 0.004884479 | -0.01289814 | 0.02266710 | 0.7640413 |



```
Aaeg-CS-Bra (WT) 0.009953603 -0.01182557 0.03173277 0.4848501
Aaeg-CS-Aaeg-M 0.005069124 -0.01671005 0.02684830 0.8235245
```

```
mod.surv.14 = lm(data = data_aeg.sum,
  formula = sur.14 ~ Line)
summary(mod.surv.14)
```

```
Call:
lm(formula = sur.14 ~ Line, data = data_aeg.sum)
```

```
Residuals:
    Min       1Q   Median       3Q      Max
-0.025193 -0.009310  0.002312  0.010522  0.020920
```

```
Coefficients:
            Estimate Std. Error t value Pr(>|t|)
(Intercept) 0.977574   0.005019 194.776  <2e-16 ***
LineAaeg-M  0.001505   0.007098   0.212   0.835
LineAaeg-CS 0.008140   0.008693   0.936   0.362
---
```

```
Signif. codes:  0 '***' 0.001 '**' 0.01 '*' 0.05 '.' 0.1 ' ' 1
```

```
Residual standard error: 0.0142 on 17 degrees of freedom
Multiple R-squared: 0.05089, Adjusted R-squared: -0.06077
F-statistic: 0.4558 on 2 and 17 DF, p-value: 0.6415
```

```
TukeyHSD(aov(mod.surv.14))
```

```
Tukey multiple comparisons of means
95% family-wise confidence level
```

```
Fit: aov(formula = mod.surv.14)
```

```
$Line
              diff          lwr          upr          p adj
Aaeg-M-Bra (WT) 0.001505310 -0.01670328 0.01971390 0.9755453
Aaeg-CS-Bra (WT) 0.008139992 -0.01416088 0.03044087 0.6254566
Aaeg-CS-Aaeg-M  0.006634682 -0.01566619 0.02893556 0.7299193
```

```
Replication
```

```
# A tibble: 3 x 3
  Line      N      n
  <fct> <int> <int>
1 Bra (WT)     8   791
2 Aaeg-M       8   755
3 Aaeg-CS      4   420
```

```
Model quality
```

```
check_model(mod.surv.7)
```

### Posterior Predictive Check

Model-predicted lines should resemble observed data

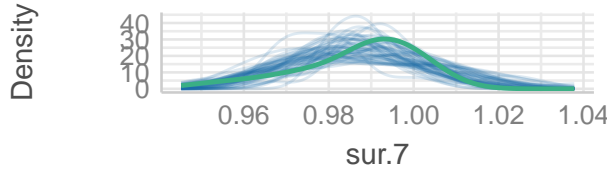

### Linearity

Reference line should be flat and horizontal

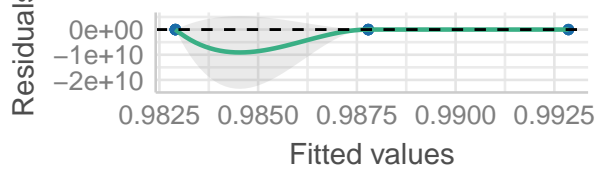

— predicted data — Observed data — Observed data

### Homogeneity of Variance

Reference line should be flat and horizontal

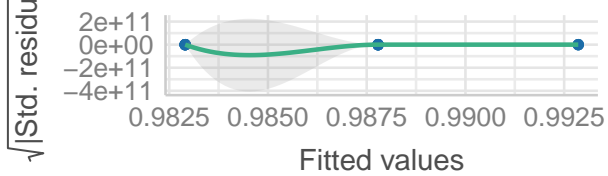

### Influential Observations

Points should be inside the contour lines

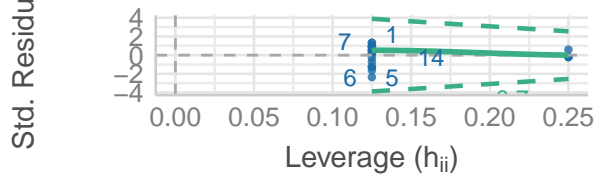

### Normality of Residuals

Points should fall along the line

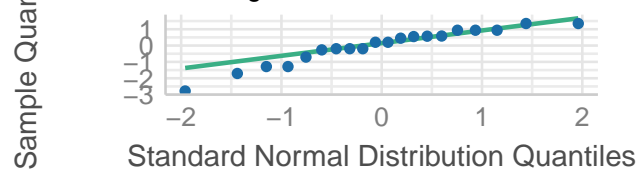

```
check_model(mod.surv.14)
```

### Posterior Predictive Check

Model-predicted lines should resemble observed data

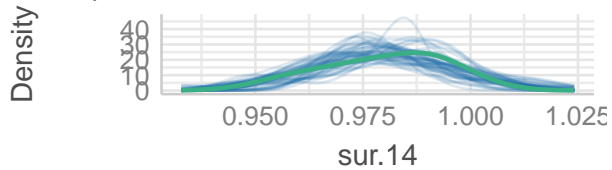

### Linearity

Reference line should be flat and horizontal

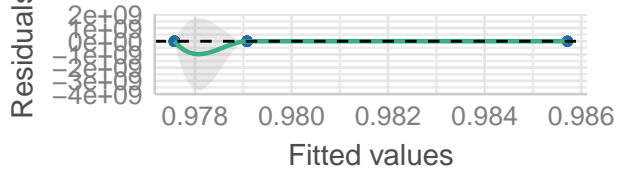

— Predicted data — Observed data — Observed data

### Homogeneity of Variance

Reference line should be flat and horizontal

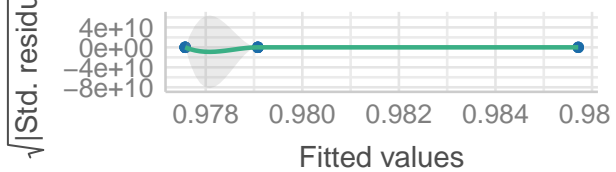

### Influential Observations

Points should be inside the contour lines

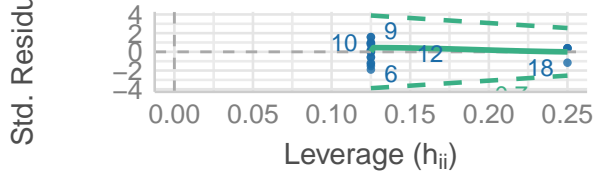

### Normality of Residuals

Dots should fall along the line

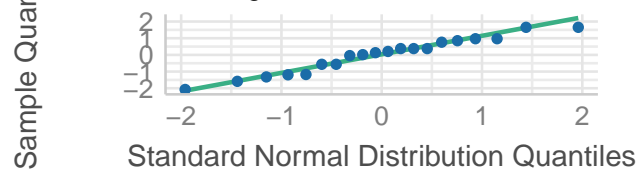

Plot .

```
ggsurv <-  
  ggsurvplot(my.KMest,  
             data = data_surv,  
             conf.int = T,  
             risk.table = T,  
             pval = T,  
             risk.table.height = 0.25,  
             xlim = c(-0.5, 16.5))  
  
line.color.aeg = c("#24ff24", "#004949", "#006ddb")  
names(line.color.aeg) = c('Line=Bra (WT)', 'Line=Aaeg-M', 'Line=Aaeg-CS')  
  
p.aeg =  
  ggsurv$plot +  
  labs(x = 'Time (days)') +  
  scale_y_continuous(limits = c(.835, 1),  
                    breaks = c(.84, .90, .95, 1),  
                    labels = c(0, .90, .95, 1)) +  
  scale_x_continuous(breaks = c(0, 7, 14), limits = c(-1, 21)) +  
  scale_color_manual(breaks = names(line.color.aeg),  
                    values = line.color.aeg,  
                    guide = 'none') +  
  scale_fill_manual(breaks = names(line.color.aeg),
```

```

        values = line.color.aeg,
        labels = c("Bra (WT)", "Aaeg-M", "Aaeg-CS"),
        name = "Line") +
theme(axis.line.y = element_blank(),
      legend.position = 'right',
      panel.background = element_rect(fill = 'white')) +
annotate(geom = 'segment', x = -Inf, xend = -Inf,
        y = -Inf, yend = Inf) +
annotate(geom = 'segment', x = -Inf, xend = -Inf,
        y = .85, yend = .89, linetype = 'dashed', color = 'white') +
annotate(geom = 'text',
        x = -.5, y = .91,
        label = "Number at risk",
        hjust = 0, size = 4) +
annotate(geom = 'text',
        x = rep(0, 3), y = seq(.841, .881, .02),
        label = rev(df$nb.rk[df$t == 1]),
        color = rev(c("#24ff24", "#004949", "#006ddb")),
        size = 4) +
annotate(geom = 'text',
        x = rep(7, 3), y = seq(.841, .881, .02),
        label = rev(df$nb.rk[df$t == 7]),
        color = rev(c("#24ff24", "#004949", "#006ddb")),
        size = 4) +
annotate(geom = 'text',
        x = rep(14, 3), y = seq(.841, .881, .02),
        label = rev(df$nb.rk[df$t == 14]),
        color = rev(c("#24ff24", "#004949", "#006ddb")),
        size = 4) +
annotate(geom = 'text', x = 15.5, y = .87, label = 'n.s', size = 4) +
annotate(geom = "line", x = rep(14.85,2), y = c(.86,.88)) +
annotate(geom = 'text', x = 16.7, y = .86, label = 'n.s', size = 4) +
annotate(geom = "line", x = rep(16.1,2), y = c(.84,.88))

```

p.aeg

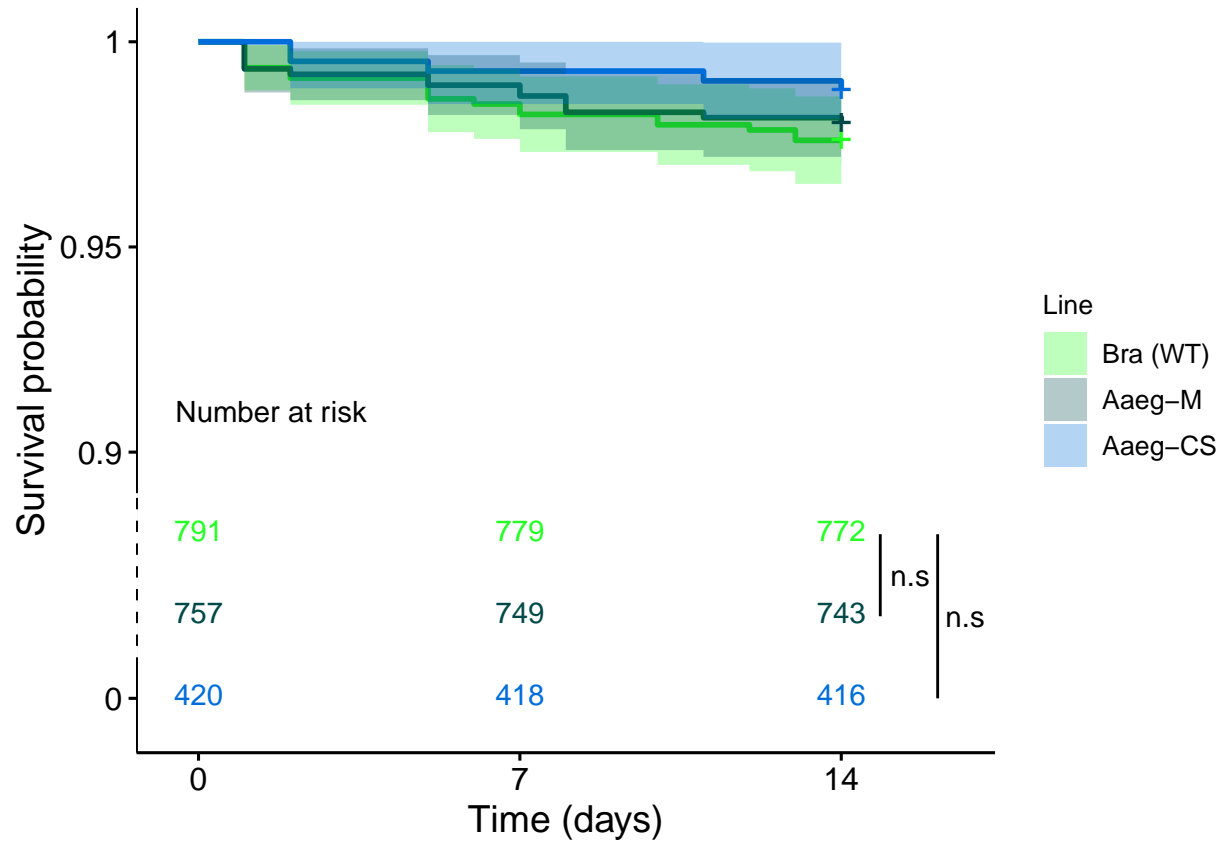

## Ae. albopictus

### Data

```
data_albo <- read.table("data/Survival_albo.txt", h = T)
data_albo$Line[data_albo$Line=='BiA-(WT)'] = 'BiA (WT)'

data_albo |> dplyr::select(-(3:5))
```

|    | Replicate | Line     | male_adults | D1 | D2 | D3 | D4 | D5 | D6 | D7 | D8 | D9 | D10 | D11 | D12 | D13 |
|----|-----------|----------|-------------|----|----|----|----|----|----|----|----|----|-----|-----|-----|-----|
| 1  | 1         | BiA (WT) | 56          | 2  | 1  | 0  | 1  | 0  | 0  | 0  | 0  | 0  | 0   | 0   | 0   | 0   |
| 2  | 2         | BiA (WT) | 96          | 1  | 1  | 0  | 0  | 0  | 0  | 0  | 0  | 0  | 0   | 0   | 0   | 1   |
| 3  | 3         | BiA (WT) | 91          | 0  | 0  | 0  | 0  | 0  | 0  | 0  | 0  | 0  | 0   | 0   | 0   | 0   |
| 4  | 4         | BiA (WT) | 76          | 1  | 0  | 0  | 0  | 0  | 0  | 0  | 0  | 1  | 0   | 0   | 0   | 0   |
| 5  | 1         | Aal-M    | 88          | 1  | 1  | 0  | 2  | 0  | 0  | 0  | 0  | 0  | 0   | 0   | 1   | 0   |
| 6  | 2         | Aal-M    | 79          | 1  | 1  | 0  | 0  | 0  | 1  | 0  | 0  | 0  | 1   | 0   | 0   | 0   |
| 7  | 3         | Aal-M    | 80          | 1  | 0  | 0  | 0  | 0  | 0  | 0  | 1  | 0  | 0   | 0   | 1   | 0   |
| 8  | 4         | Aal-M    | 73          | 1  | 0  | 0  | 0  | 0  | 0  | 0  | 0  | 0  | 0   | 0   | 0   | 0   |
| 9  | 1         | Aal-CS   | 71          | 0  | 0  | 0  | 0  | 1  | 0  | 1  | 0  | 0  | 0   | 0   | 0   | 2   |
| 10 | 2         | Aal-CS   | 73          | 0  | 0  | 0  | 2  | 0  | 0  | 0  | 0  | 0  | 0   | 1   | 0   | 1   |
| 11 | 3         | Aal-CS   | 61          | 0  | 0  | 0  | 0  | 0  | 0  | 0  | 0  | 0  | 0   | 0   | 0   | 1   |
| 12 | 4         | Aal-CS   | 69          | 0  | 0  | 0  | 0  | 0  | 0  | 0  | 1  | 0  | 0   | 0   | 0   | 0   |

D14

|    |   |
|----|---|
| 1  | 0 |
| 2  | 0 |
| 3  | 0 |
| 4  | 0 |
| 5  | 0 |
| 6  | 0 |
| 7  | 0 |
| 8  | 0 |
| 9  | 0 |
| 10 | 0 |
| 11 | 0 |
| 12 | 0 |

```
data1 <- melt(data_albo,
              .(Replicate,Line, larvae, adults, larval_deaths, male_adults))
#Then transform days in numbers
data1$variable <- as.numeric(str_replace(data1$variable, "D",""))
#Sort by Line, Replicate and variable.
data2 <- arrange(data1, Line, Replicate, variable )
#We now separate the data set in two parts: individuals that has experienced an event(death) and censor

event <- subset(data2, value>0)

#We will now work of the dataset with individuals experiencing an event.

dat <- NULL
temporary_event <- NULL
for (i in 1:nrow(event)) {
  N <- event[i, "value"]
  dat <- data.frame(Replicate=rep(event[i,"Replicate"],N),
```

```

        Line=rep(event[i,"Line"],N),
        larvae=rep(event[i,"larvae"],N),
        adults=rep(event[i,"adults"],N),
        larval_deaths=rep(event[i,"larval_deaths"],N),
        male_adults=rep(event[i,"male_adults"],N),
        Day=rep(event[i,"variable"],N),
        Event=rep(1,N))

temporary_event <- rbind(temporary_event ,dat )
}

temporary_event

```

|    | Replicate | Line     | larvae | adults | larval_deaths | male_adults | Day | Event |
|----|-----------|----------|--------|--------|---------------|-------------|-----|-------|
| 1  | 1         | Aal-CS   | 100    | 71     | 29            | 71          | 5   | 1     |
| 2  | 1         | Aal-CS   | 100    | 71     | 29            | 71          | 7   | 1     |
| 3  | 1         | Aal-CS   | 100    | 71     | 29            | 71          | 13  | 1     |
| 4  | 1         | Aal-CS   | 100    | 71     | 29            | 71          | 13  | 1     |
| 5  | 2         | Aal-CS   | 100    | 73     | 27            | 73          | 4   | 1     |
| 6  | 2         | Aal-CS   | 100    | 73     | 27            | 73          | 4   | 1     |
| 7  | 2         | Aal-CS   | 100    | 73     | 27            | 73          | 11  | 1     |
| 8  | 2         | Aal-CS   | 100    | 73     | 27            | 73          | 13  | 1     |
| 9  | 3         | Aal-CS   | 100    | 61     | 39            | 61          | 13  | 1     |
| 10 | 4         | Aal-CS   | 100    | 69     | 31            | 69          | 8   | 1     |
| 11 | 1         | Aal-M    | 100    | 88     | 12            | 88          | 1   | 1     |
| 12 | 1         | Aal-M    | 100    | 88     | 12            | 88          | 2   | 1     |
| 13 | 1         | Aal-M    | 100    | 88     | 12            | 88          | 4   | 1     |
| 14 | 1         | Aal-M    | 100    | 88     | 12            | 88          | 4   | 1     |
| 15 | 1         | Aal-M    | 100    | 88     | 12            | 88          | 12  | 1     |
| 16 | 2         | Aal-M    | 100    | 79     | 21            | 79          | 1   | 1     |
| 17 | 2         | Aal-M    | 100    | 79     | 21            | 79          | 2   | 1     |
| 18 | 2         | Aal-M    | 100    | 79     | 21            | 79          | 6   | 1     |
| 19 | 2         | Aal-M    | 100    | 79     | 21            | 79          | 10  | 1     |
| 20 | 3         | Aal-M    | 100    | 80     | 20            | 80          | 1   | 1     |
| 21 | 3         | Aal-M    | 100    | 80     | 20            | 80          | 8   | 1     |
| 22 | 3         | Aal-M    | 100    | 80     | 20            | 80          | 12  | 1     |
| 23 | 4         | Aal-M    | 100    | 77     | 23            | 73          | 1   | 1     |
| 24 | 1         | BiA (WT) | 200    | 103    | 97            | 56          | 1   | 1     |
| 25 | 1         | BiA (WT) | 200    | 103    | 97            | 56          | 1   | 1     |
| 26 | 1         | BiA (WT) | 200    | 103    | 97            | 56          | 2   | 1     |
| 27 | 1         | BiA (WT) | 200    | 103    | 97            | 56          | 4   | 1     |
| 28 | 2         | BiA (WT) | 200    | 141    | 59            | 96          | 1   | 1     |
| 29 | 2         | BiA (WT) | 200    | 141    | 59            | 96          | 2   | 1     |
| 30 | 2         | BiA (WT) | 200    | 141    | 59            | 96          | 13  | 1     |
| 31 | 4         | BiA (WT) | 200    | 130    | 70            | 76          | 1   | 1     |
| 32 | 4         | BiA (WT) | 200    | 130    | 70            | 76          | 9   | 1     |

```

# here is or transformed dataset with one
# row for each time we have an event.

# BIA rep3 has no event over the course of
# the study, we add it manually so that it would appear.
dat <- data.frame(Replicate=3, Line="BiA (WT)",

```

```

    larvae=200, adults=129, larval_deaths=71,
    male_adults=91, Day=14, Event=0)

temporary_event <- rbind(temporary_event, dat)

#We now add the censored values.

censored <- unique(ddply(temporary_event,
  .(Replicate,Line,larvae,adults,larval_deaths,male_adults),
  summarise,
  variable=Day,
  Event=sum(Event),
  Censored=(male_adults-Event))[,,-7])
censored$variable <- max(data2$variable)

dat <- NULL
temporary <- NULL
for (i in 1:nrow(censored)) {
  N <- censored[i, "Censored"]
  dat <- data.frame(Replicate=rep(censored[i,"Replicate"],N) ,
    Line=rep(censored[i,"Line"],N) ,
    larvae=rep(censored[i,"larvae"],N) ,
    adults=rep(censored[i,"adults"],N) ,
    larval_deaths=rep(censored[i,"larval_deaths"],N) ,
    male_adults=rep(censored[i,"male_adults"],N),
    Day=rep(censored[i,"variable"],N),
    Event=rep(0,N) )

  temporary <- rbind(temporary,dat )
}

#Bind the final dataset
data_surv <- rbind(temporary_event, temporary)
data_surv <- arrange(data_surv, Line,Replicate,desc(Event),Day)

SurvObj <- with(data_surv, Surv(Day, Event))

```

Model .

```

my.KMest <- survfit(SurvObj ~ Line , conf.int = 0.95, data = data_surv)
summary(my.KMest)

```

Call: survfit(formula = SurvObj ~ Line, data = data\_surv, conf.int = 0.95)

```

      Line=Aal-CS
time n.risk n.event survival std.err lower 95% CI upper 95% CI
  4    274     2    0.993 0.00514    0.983    1.000
  5    272     1    0.989 0.00629    0.977    1.000
  7    271     1    0.985 0.00725    0.971    1.000
  8    270     1    0.982 0.00809    0.966    0.998
 11    269     1    0.978 0.00884    0.961    0.996
 13    268     4    0.964 0.01133    0.942    0.986

```



```

Line=Aal-M
time n.risk n.event survival std.err lower 95% CI upper 95% CI
  1   320     4   0.988 0.00621   0.975   1.000
  2   316     2   0.981 0.00758   0.967   0.996
  4   314     2   0.975 0.00873   0.958   0.992
  6   312     1   0.972 0.00924   0.954   0.990
  8   311     1   0.969 0.00973   0.950   0.988
 10   310     1   0.966 0.01018   0.946   0.986
 12   309     2   0.959 0.01104   0.938   0.981

```

```

Line=BiA (WT)
time n.risk n.event survival std.err lower 95% CI upper 95% CI
  1   320     4   0.988 0.00621   0.975   1.000
  2   316     2   0.981 0.00758   0.967   0.996
  4   314     1   0.978 0.00818   0.962   0.994
  9   313     1   0.975 0.00873   0.958   0.992
 13   312     1   0.972 0.00924   0.954   0.990

```

```

df = data.frame(t = my.KMest$time,
               nb.rk = my.KMest$n.risk,
               line = c(rep(names(my.KMest$strata[1]),
                           my.KMest$strata[1]),
                       rep(names(my.KMest$strata[2]),
                           my.KMest$strata[2]),
                       rep(names(my.KMest$strata[3]),
                           my.KMest$strata[3])))
)

df$t[df$line == 'Line=Aal-M' & df$t==6] = 7
df$t[df$line == 'Line=BiA (WT)' & df$t==4] = 7
df$t[df$line == 'Line=Aal-CS' & df$t==4] = 1

df$line = factor(df$line, levels = c('Line=BiA (WT)', 'Line=Aal-M', 'Line=Aal-CS'))
df = df[order(df$line),]

data_albo.sum =
  data_albo %>%
  group_by(Line, Replicate) %>%
  dplyr::summarise(sur.7 = (male_adults -
                        (D1 + D2 + D3 + D4 + D5 + D6 + D7))/
                  male_adults,
                  sur.14 = (male_adults - (D1 + D2 + D3 + D4 + D5 +
                                           D6 + D7 + D8 + D9 + D10 +
                                           D11 + D14 + D13 + D14))/
                  male_adults)

data_albo.sum$Line = data_albo.sum$Line %>%
  factor(., levels = c('BiA (WT)', 'Aal-M', 'Aal-CS'))

mod.surv.7 = lm(data = data_albo.sum,
               formula = sur.7 ~ Line)

summary(mod.surv.7)

```

```

Call:
lm(formula = sur.7 ~ Line, data = data_albo.sum)

Residuals:
    Min       1Q   Median       3Q      Max
-0.045074 -0.013699  0.009359  0.013892  0.026355

Coefficients:
            Estimate Std. Error t value Pr(>|t|)
(Intercept)  0.973645   0.011243  86.600 1.85e-14 ***
LineAal-M    -0.001052   0.015900  -0.066   0.949
LineAal-CS    0.012463   0.015900   0.784   0.453
---
Signif. codes:  0 '***' 0.001 '**' 0.01 '*' 0.05 '.' 0.1 ' ' 1

Residual standard error: 0.02249 on 9 degrees of freedom
Multiple R-squared:  0.09038,    Adjusted R-squared:  -0.1118
F-statistic: 0.4471 on 2 and 9 DF,  p-value: 0.6529

```

```
TukeyHSD(aov(mod.surv.7))
```

```

Tukey multiple comparisons of means
 95% family-wise confidence level

```

```
Fit: aov(formula = mod.surv.7)
```

```

$Line
              diff          lwr          upr          p adj
Aal-M-BiA (WT) -0.001052015 -0.04544497  0.04334094  0.9975900
Aal-CS-BiA (WT)  0.012463381 -0.03192957  0.05685634  0.7216963
Aal-CS-Aal-M     0.013515396 -0.03087756  0.05790835  0.6831225

```

```

mod.surv.14 = lm(data = data_albo.sum,
  formula = sur.14 ~ Line)

summary(mod.surv.14)

```

```

Call:
lm(formula = sur.14 ~ Line, data = data_albo.sum)

Residuals:
    Min       1Q   Median       3Q      Max
-0.039180 -0.017525  0.003466  0.019333  0.032249

Coefficients:
            Estimate Std. Error t value Pr(>|t|)
(Intercept)  0.967751   0.011931  81.111 3.33e-14 ***
LineAal-M    -0.001448   0.016873  -0.086   0.933
LineAal-CS   -0.003256   0.016873  -0.193   0.851
---
Signif. codes:  0 '***' 0.001 '**' 0.01 '*' 0.05 '.' 0.1 ' ' 1

```

Residual standard error: 0.02386 on 9 degrees of freedom  
Multiple R-squared: 0.004137, Adjusted R-squared: -0.2172  
F-statistic: 0.0187 on 2 and 9 DF, p-value: 0.9815

```
TukeyHSD(aov(mod.surv.14))
```

Tukey multiple comparisons of means  
95% family-wise confidence level

Fit: aov(formula = mod.surv.14)

```
$Line
```

|                 | diff         | lwr         | upr        | p adj     |
|-----------------|--------------|-------------|------------|-----------|
| Aal-M-BiA (WT)  | -0.001447932 | -0.04855825 | 0.04566239 | 0.9959503 |
| Aal-CS-BiA (WT) | -0.003256096 | -0.05036641 | 0.04385422 | 0.9797262 |
| Aal-CS-Aal-M    | -0.001808164 | -0.04891848 | 0.04530215 | 0.9936934 |

Replication

```
# A tibble: 3 x 3
```

| Line       | N     | n     |
|------------|-------|-------|
| <chr>      | <int> | <int> |
| 1 Aal-CS   | 4     | 274   |
| 2 Aal-M    | 4     | 320   |
| 3 BiA (WT) | 4     | 319   |

Model quality

```
check_model(mod.surv.7)
```

### Posterior Predictive Check

Model-predicted lines should resemble observed data

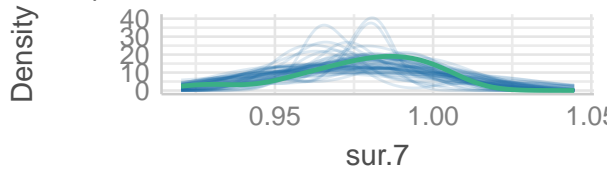

### Linearity

Reference line should be flat and horizontal

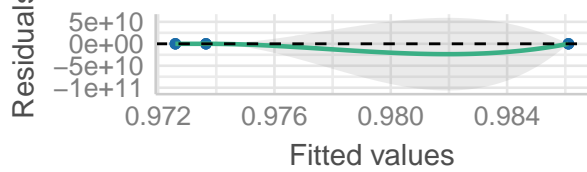

— Model-predicted data — Observed data — Observed data

### Homogeneity of Variance

Reference line should be flat and horizontal

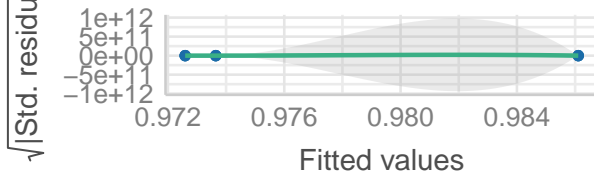

### Influential Observations

Points should be inside the contour lines

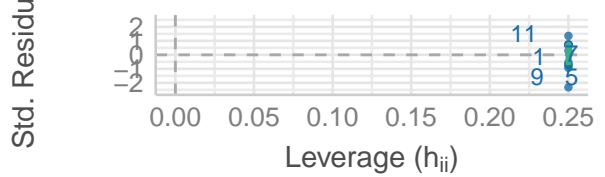

### Normality of Residuals

Points should fall along the line

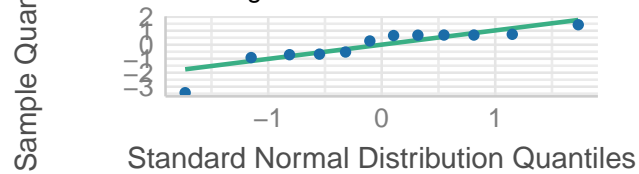

```
check_model(mod.surv.14)
```

### Posterior Predictive Check

Model-predicted lines should resemble observed data

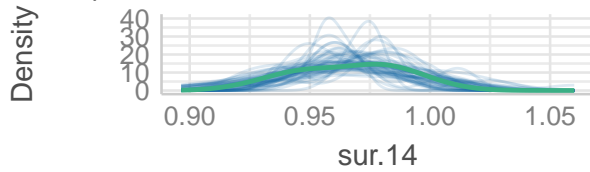

### Linearity

Reference line should be flat and horizontal

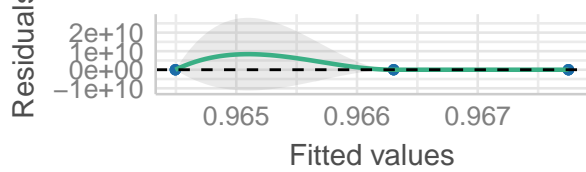

l-predicted data — Observed data — Observed data

### Homogeneity of Variance

Reference line should be flat and horizontal

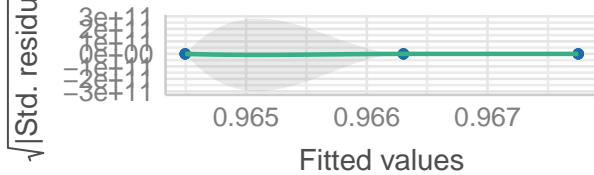

### Influential Observations

Points should be inside the contour lines

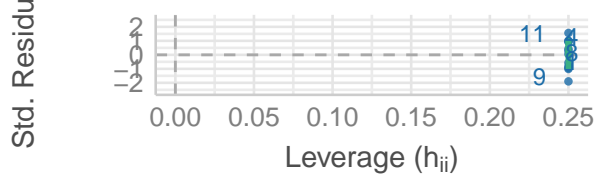

### Normality of Residuals

Dots should fall along the line

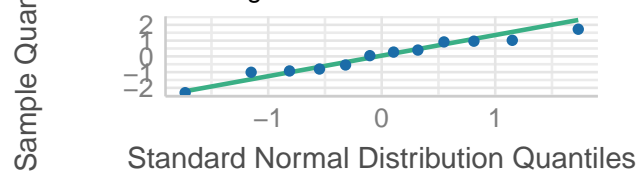

Plot .

```

ggsurv <-
  ggsurvplot(my.KMest,
             data = data_surv,
             conf.int = T,
             risk.table = T,
             pval = T,
             risk.table.height = 0.25,
             xlim = c(-0.5, 16.5))

line.color.alb = c("#24ff24", "#004949", "#006ddb")
names(line.color.alb) = c('Line=BiA (WT)', 'Line=Aal-M', 'Line=Aal-CS')

p.albo =
  ggsurv$plot +
  labs(x = 'Time (days)') +
  scale_y_continuous(limits = c(.835, 1),
                    breaks = c(.84, .90, .95, 1),
                    labels = c(0, .90, .95, 1)) +
  scale_x_continuous(breaks = c(0, 7, 14)) +
  scale_color_manual(breaks = names(line.color.alb),
                    values = line.color.alb,
                    guide = 'none') +
  scale_fill_manual(breaks = names(line.color.alb),

```

```

        values = line.color.alb,
        labels = c("BiA (WT)", "Aal-M", "Aal-CS"),
        name = "Line: ") +
theme(axis.line.y = element_blank(),
      legend.position = 'right',
      panel.background = element_rect(fill = 'grey')) +
annotate(geom = 'segment', x = -Inf, xend = -Inf,
        y = -Inf, yend = Inf) +
annotate(geom = 'segment', x = -Inf, xend = -Inf,
        y = .85, yend = .89, linetype = 'dashed', color = 'white') +
annotate(geom = 'text',
        x = -.5, y = .895,
        label = "Number at risk",
        hjust = 0, size = 4) +
annotate(geom = 'text',
        x = rep(0, 3), y = seq(.841, .881, .02),
        label = rev(df$nb.rk[df$t == 1]),
        color = rev(c("#24ff24", "#004949", "#006ddb")),
        size = 4) +
annotate(geom = 'text',
        x = rep(7, 3), y = seq(.841, .881, .02),
        label = rev(df$nb.rk[df$t == 7]),
        color = rev(c("#24ff24", "#004949", "#006ddb")),
        size = 4) +
annotate(geom = 'text',
        x = rep(14, 3), y = seq(.841, .881, .02),
        label = rev(df$nb.rk[df$t == 14]),
        color = rev(c("#24ff24", "#004949", "#006ddb")),
        size = 4) +
annotate(geom = 'text', x = 15.5, y = .87, label = 'n.s', size = 4) +
annotate(geom = "line", x = rep(14.85,2), y = c(.86,.88)) +
annotate(geom = 'text', x = 16.7, y = .86, label = 'n.s', size = 4) +
annotate(geom = "line", x = rep(16.1,2), y = c(.84,.88))

p.albo

```

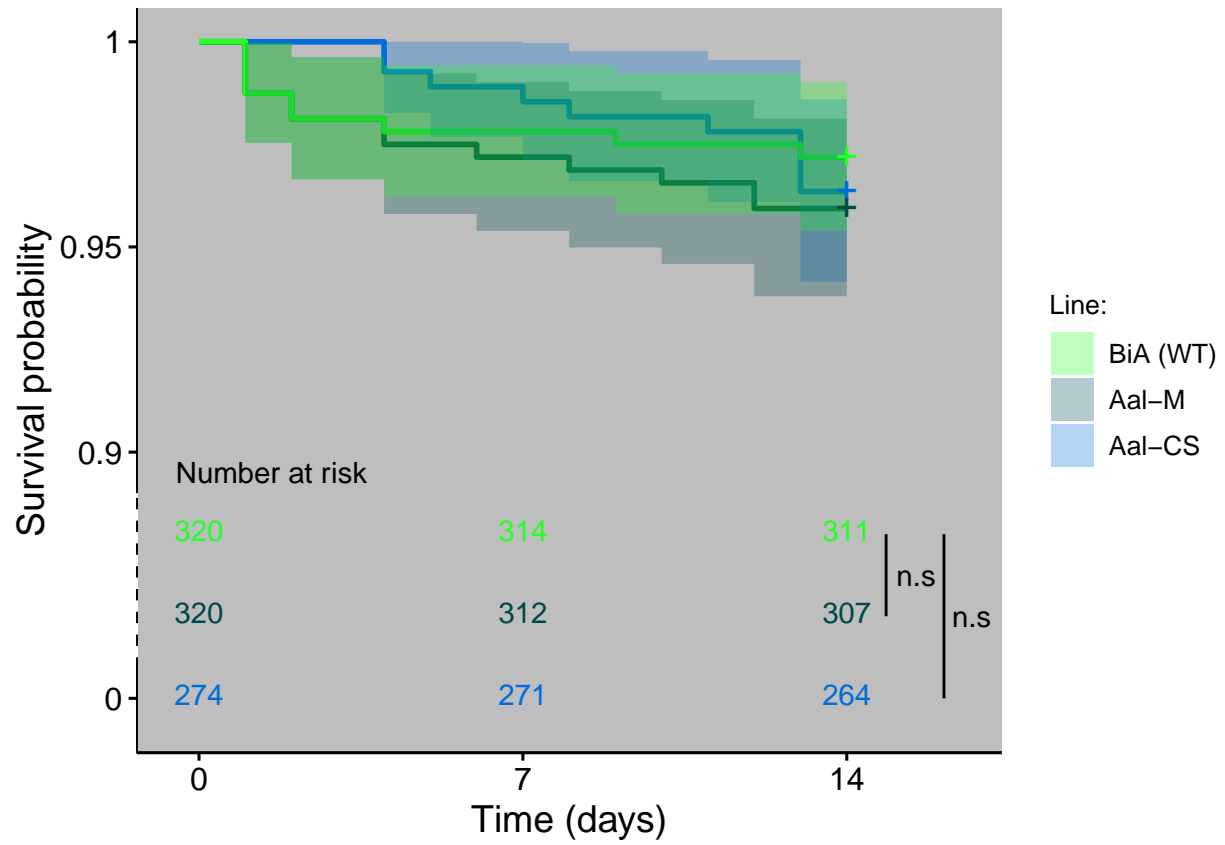

## Figure 5

### Data

```
speed.aeg = read.csv('data/Speed-test_aeg.csv', sep = ';') %>%
  mutate(recovery = 100*recovered_males/total_males) %>%
  mutate(contamination = 100*contamination/total_males)

speed.albo = read.csv('data/Speed-test_albo.csv', sep = ';') %>%
  mutate(recovery = 100*recovered_males/total_males) %>%
  mutate(contamination = 100*contamination/total_males)

head(speed.aeg)
```

|   | Replicate | Volume | Larval_concentration | Mean_speed | total_males | recovered_males |
|---|-----------|--------|----------------------|------------|-------------|-----------------|
| 1 | 1         | 500    | 20                   | 6          | 3924.536    | 3619            |
| 2 | 2         | 500    | 20                   | 6          | 3898.820    | 3578            |
| 3 | 3         | 500    | 20                   | 6          | 3829.696    | 3556            |
| 4 | 1         | 250    | 40                   | 12         | 3672.180    | 3328            |
| 5 | 2         | 250    | 40                   | 12         | 3366.765    | 2927            |
| 6 | 3         | 250    | 40                   | 12         | 3408.405    | 3037            |

  

|   | contamination | recovery |
|---|---------------|----------|
| 1 | 0             | 92.21472 |
| 2 | 0             | 91.77136 |
| 3 | 0             | 92.85332 |
| 4 | 0             | 90.62737 |
| 5 | 0             | 86.93805 |
| 6 | 0             | 89.10326 |

### Model

#### Recovery

```
speed.lm = lm(formula = recovery~Mean_speed,
              data = speed.aeg)

speed.poly2 = lm(formula = recovery~poly(Mean_speed, degree = 2),
                 data = speed.aeg)

speed.poly3 = lm(formula = recovery~poly(Mean_speed, degree = 3),
                 data = speed.aeg)

speed.poly4 = lm(formula = recovery~poly(Mean_speed, degree = 4),
                 data = speed.aeg)

speed.log = lm(formula = recovery~log(Mean_speed),
               data = speed.aeg)

compare_performance(speed.lm, speed.log,
```



```
speed.poly2, speed.poly3,
speed.poly4)
```

```
# Comparison of Model Performance Indices
```

| Name        | Model | AIC (weights) | AICc (weights) | BIC (weights) | R2    | R2 (adj.) | RMSE  | Sigma |
|-------------|-------|---------------|----------------|---------------|-------|-----------|-------|-------|
| speed.lm    | lm    | 107.1 (<.001) | 109.3 (<.001)  | 109.2 (<.001) | 0.917 | 0.911     | 7.034 | 7.55  |
| speed.log   | lm    | 103.2 (<.001) | 105.3 (<.001)  | 105.3 (<.001) | 0.936 | 0.932     | 6.169 | 6.62  |
| speed.poly2 | lm    | 82.9 (0.409)  | 86.9 (0.773)   | 85.8 (0.518)  | 0.986 | 0.983     | 2.941 | 3.28  |
| speed.poly3 | lm    | 82.8 (0.432)  | 89.5 (0.215)   | 86.4 (0.383)  | 0.987 | 0.984     | 2.742 | 3.20  |
| speed.poly4 | lm    | 84.8 (0.159)  | 95.3 (0.012)   | 89.1 (0.099)  | 0.987 | 0.982     | 2.742 | 3.35  |

Best model:

```
summary(speed.poly2)
```

Call:

```
lm(formula = recovery ~ poly(Mean_speed, degree = 2), data = speed.aeg)
```

Residuals:

| Min     | 1Q      | Median | 3Q     | Max    |
|---------|---------|--------|--------|--------|
| -6.2202 | -1.0021 | 0.2709 | 1.1871 | 6.7801 |

Coefficients:

|                               | Estimate | Std. Error | t value | Pr(> t )     |
|-------------------------------|----------|------------|---------|--------------|
| (Intercept)                   | 65.498   | 0.849      | 77.144  | < 2e-16 ***  |
| poly(Mean_speed, degree = 2)1 | -90.774  | 3.288      | -27.605 | 3.15e-12 *** |
| poly(Mean_speed, degree = 2)2 | 24.746   | 3.288      | 7.526   | 6.99e-06 *** |

---

Signif. codes: 0 '\*\*\*' 0.001 '\*\*' 0.01 '\*' 0.05 '.' 0.1 ' ' 1

Residual standard error: 3.288 on 12 degrees of freedom

Multiple R-squared: 0.9856, Adjusted R-squared: 0.9831

F-statistic: 409.3 on 2 and 12 DF, p-value: 9.089e-12

## Contamination

```
conta.lm = lm(formula = contamination~Mean_speed,
              data = speed.aeg)

conta.poly2 = lm(formula = contamination~poly(Mean_speed, degree = 2),
                 data = speed.aeg)

conta.poly3 = lm(formula = contamination~poly(Mean_speed, degree = 3),
                 data = speed.aeg)

conta.poly4 = lm(formula = contamination~poly(Mean_speed, degree = 4),
```

```

data = speed.aeg)

conta.log = lm(formula = contamination~log(Mean_speed),
data = speed.aeg)

compare_performance(conta.lm,
                    conta.log,
                    conta.poly2,
                    conta.poly3,
                    conta.poly4)

```

# Comparison of Model Performance Indices

| Name        | Model | AIC (weights) | AICc (weights) | BIC (weights) | R2    | R2 (adj.) | RMSE  | Sigma |
|-------------|-------|---------------|----------------|---------------|-------|-----------|-------|-------|
| conta.lm    | lm    | -17.1 (0.138) | -14.9 (0.354)  | -15.0 (0.207) | 0.626 | 0.597     | 0.112 | 0.120 |
| conta.log   | lm    | -8.2 (0.002)  | -6.1 (0.004)   | -6.1 (0.002)  | 0.326 | 0.274     | 0.150 | 0.163 |
| conta.poly2 | lm    | -19.9 (0.561) | -15.9 (0.579)  | -17.1 (0.588) | 0.729 | 0.683     | 0.096 | 0.107 |
| conta.poly3 | lm    | -18.0 (0.219) | -11.3 (0.060)  | -14.5 (0.161) | 0.731 | 0.657     | 0.095 | 0.111 |
| conta.poly4 | lm    | -16.0 (0.081) | -5.5 (0.003)   | -11.8 (0.042) | 0.731 | 0.623     | 0.095 | 0.111 |

Best model

```
summary(conta.lm)
```

Call:

```
lm(formula = contamination ~ Mean_speed, data = speed.aeg)
```

Residuals:

```

      Min       1Q   Median       3Q      Max
-0.25076 -0.06549  0.03905  0.04709  0.24102

```

Coefficients:

```

              Estimate Std. Error t value Pr(>|t|)
(Intercept) -0.0551361  0.0422440  -1.305  0.214460
Mean_speed   0.0013403  0.0002872   4.667  0.000441 ***
---

```

```
Signif. codes:  0 '***' 0.001 '**' 0.01 '*' 0.05 '.' 0.1 ' ' 1
```

```

Residual standard error: 0.1204 on 13 degrees of freedom
Multiple R-squared:  0.6262,    Adjusted R-squared:  0.5975
F-statistic: 21.78 on 1 and 13 DF,  p-value: 0.0004409

```

Plot

```

pred.speed = ggpredict(speed.poly2) %>%
  data.frame()
pred.conta = ggpredict(conta.lm) %>%

```

```

data.frame()

reco.plot =
ggplot(data = NULL) +
  annotate(geom = 'line', x = c(60, 60), y = c(-Inf,70),
          lty =2, color = 'gray', size = 1 ) +
  annotate(geom = 'line', x = c(-Inf, 60), y = c(70,70),
          lty =2, color = 'gray', size = 1 ) +
  geom_ribbon(data = pred.speed,
            aes(x = Mean_speed.x,
                ymin = Mean_speed.conf.low,
                ymax = Mean_speed.conf.high),
            fill = "grey", alpha=.3) +
  geom_line(data= pred.speed,
            aes(Mean_speed.x,
                Mean_speed.predicted),
            col = "black") +
  geom_ribbon(data = pred.conta,
            aes(x = Mean_speed.x,
                ymin = Mean_speed.conf.low,
                ymax = Mean_speed.conf.high),
            fill = "red", alpha=.3) +
  geom_line(data= pred.conta,
            aes(x = Mean_speed.x,
                y = Mean_speed.predicted),
            col="red") +
  geom_point(data = speed.aeg,
            aes(x = Mean_speed,
                y = recovery,
                col = 'Recovery', pch = "Ae. Aegypti")) +
  geom_point(data = speed.aeg,
            aes(x = Mean_speed,
                y = contamination,
                col = 'Contamination', pch = "Ae. Aegypti")) +
  geom_point(data = speed.albo,
            aes(x = Mean_speed,
                y = recovery,
                col = 'Recovery', pch = "Ae. Albopictus")) +
  geom_point(data = speed.albo,
            aes(x = Mean_speed,
                y = contamination,
                col = 'Contamination', pch = "Ae. Albopictus")) +
  annotate(geom='text', x = -27, y =70, label = bquote(italic('70')), color = 'gray') +
  annotate(geom='text', x = 275, y =50, label = bquote(R^2 ~ '=' 98.3%), color = 'black') +
  annotate(geom='text', x = 275, y =10, label = bquote(R^2 ~ '=' 55.6%), color = 'red') +
  labs(x = 'Sorting speed (larvae/sec) \n [larval concentration (larvae/mL)]',
       y = 'Percentage of recovery\n and contamination (%)',
       color = "Measurement" ,
       pch = "Species") +
  scale_y_continuous(breaks = seq(0,100,25)) +
  scale_x_continuous(breaks = seq(0, 300, 60),
                    labels = c("0 [0]", '60 [200]', '120 [400]',
                                '180 [600]', '240 [800]', '300 [1000]')) +

```

```

scale_shape_manual(labels = c(bquote(italic("Ae. aegypti")),
                             bquote(italic("Ae. albopictus"))),
                  values = c(16, 17)) +
scale_color_manual(labels = c("Recovery",
                              "Contamination"),
                  values = c(Recovery = "black", Contamination = "red")) +
coord_cartesian(xlim = c(0,300), ylim = c(-5,100), clip = 'off') +
theme_classic() +
theme(text = element_text(size = 15),
      legend.position = 'right')
reco.plot

```

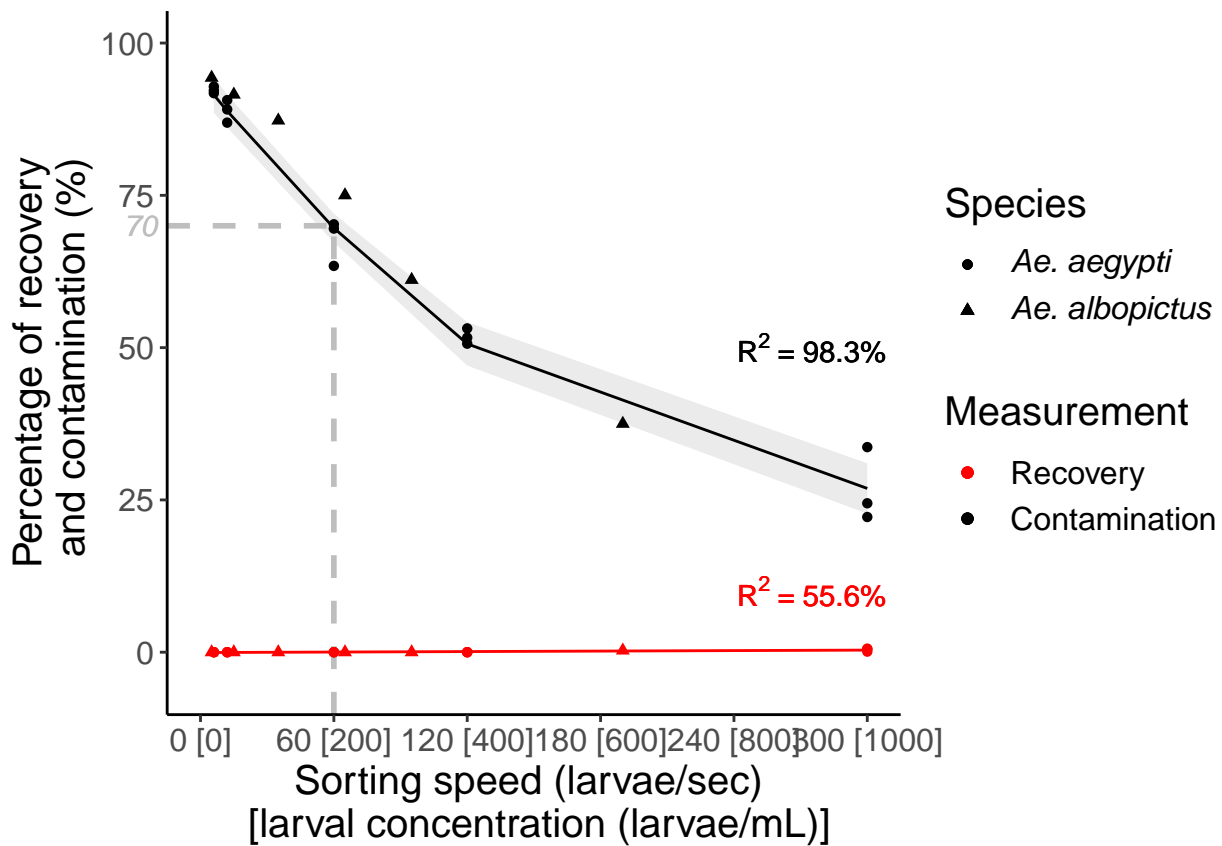

Supplement: 42003_2023_5030_MOESM5_ESM.pdf [file 42003_2023_5030_MOESM5_ESM.pdf]
