# Supplementary material for: Combining two genetic sexing strains allows sorting of non-transgenic males for Aedes genetic control
Source: PubMed Central journal article supplement (PMC10275924; doi:10.1038/s42003-023-05030-7), 2023-06-16
Supplement: 42003_2023_5030_MOESM2_ESM.pdf [file 42003_2023_5030_MOESM2_ESM.pdf]

## **Supplementary Information**

### **Combining two Genetic Sexing Strains allows sorting of non-transgenic males for *Aedes* genetic control**

Célia Lutrat, Myriam Burckbuchler, Roenick Proveti Olmo, Rémy Beugnon, Albin Fontaine, Omar S. Akbari, Rafael Argilés-Herrero, Thierry Baldet, Jérémy Bouyer, Eric Marois

#### **List of Supplementary Tables:**

Supplementary Table 1

Supplementary Table 2

Supplementary Table 3

#### **List of Supplementary Data:**

Supplementary Data 1

Supplementary Data 2

Supplementary Data 3

Supplementary Data 4

**Supplementary Table 1: Summary and significance of statistical tests performed.** More details can be found in **Supplementary Data 2**.

| <b>Sex ratio (%)</b>                      |                         |                       |
|-------------------------------------------|-------------------------|-----------------------|
| <b>Pairwise comparison</b>                | <b>Estimate (SE) *</b>  | <b><i>p</i>-value</b> |
| Aaeg-M vs. Bra (WT)                       | -0.06 (0.09)            | 0.903                 |
| Aaeg-m vs. Bra (WT)                       | -0.01 (0.08)            | 0.999                 |
| Aaeg-CS vs. Bra (WT)                      | 0.05 (0.09)             | 0.935                 |
| Aal-M vs. BiA (WT)                        | -0.09 (0.11)            | 0.847                 |
| Aal-m vs. BiA (WT)                        | -0.09 (0.12)            | 0.858                 |
| Aal-CS vs. BiA (WT)                       | -0.03 (0.11)            | 0.990                 |
| <b>Fecundity (%)</b>                      |                         |                       |
| <b>Pairwise comparison</b>                | <b>Estimate (SE) **</b> | <b><i>p</i>-value</b> |
| <b>Zero hurdle models</b>                 |                         |                       |
| Aaeg-M vs. Bra (WT)                       | 0.21 (0.65)             | 0.745                 |
| Aaeg-m vs. Bra (WT)                       | 0.84 (0.77)             | 0.271                 |
| Aaeg-CS vs. Bra (WT)                      | 0.61 (0.71)             | 0.386                 |
| Aal-M vs. BiA (WT)                        | 0.52 (0.34)             | 0.626                 |
| Aal-m vs. BiA (WT)                        | -1.11 (0.65)            | 0.087 .               |
| Aal-CS vs. BiA (WT)                       | -0.52 (0.68)            | 0.447                 |
| <b>Truncated negative binomial models</b> |                         |                       |
| Aaeg-M vs. Bra (WT)                       | -0.20 (0.34)            | 0.551                 |
| Aaeg-m vs. Bra (WT)                       | -0.07 (0.34)            | 0.838                 |
| Aaeg-CS vs. Bra (WT)                      | 0.61 (0.34)             | 0.073 .               |
| Aal-M vs. BiA (WT)                        | 0.52 (0.34)             | 0.126                 |
| Aal-m vs. BiA (WT)                        | 0.41 (0.36)             | 0.252                 |
| Aal-CS vs. BiA (WT)                       | 0.08 (0.35)             | 0.816                 |
| <b>Egg hatching rate (%)</b>              |                         |                       |
| <b>Pairwise comparison</b>                | <b>Estimate (SE) *</b>  | <b><i>p</i>-value</b> |
| Aaeg-M vs. Bra (WT)                       | -0.17 (0.10)            | 0.334                 |

|                                    |                        |                |
|------------------------------------|------------------------|----------------|
| Aaeg-m vs. Bra (WT)                | 0.99 (0.11)            | < 0.001 ***    |
| Aaeg-CS vs. Bra (WT)               | 0.83 (0.10)            | < 0.001 ***    |
| Aal-M vs. BiA (WT)                 | 0.15 (0.04)            | 0.002 **       |
| Aal-m vs. BiA (WT)                 | -0.03 (0.06)           | 0.957          |
| Aal-CS vs. BiA (WT)                | 0.10 (0.04)            | 0.046 *        |
| <b>Larva to adult survival (%)</b> |                        |                |
| <b>Pairwise comparison</b>         | <b>Estimate (SE)</b>   | <b>p-value</b> |
| Aaeg-M vs. Bra (WT)                | -4.87 (3.83)           | 0.592          |
| Aaeg-m vs. Bra (WT)                | 1.00 (4.22)            | 0.996          |
| Aaeg-CS vs. Bra (WT)               | 3.75 (4.22)            | 0.831          |
| Aal-M vs. BiA (WT)                 | 18.13 (4.00)           | 0.003 **       |
| Aal-m vs. BiA (WT)                 | 16.63 (4.00)           | 0.006 **       |
| Aal-CS vs. BiA (WT)                | 5.62 (4.00)            | 0.520          |
| <b>Male competitiveness (%)</b>    |                        |                |
| <b>Difference from expected</b>    | <b>Estimate (SE) *</b> | <b>p-value</b> |
| Aaeg-M vs. Bra (WT)                | 0.04 (0.04)            | 0.318          |
| Aaeg-M vs. Aaeg-CS                 | 0.08 (0.04)            | 0.057          |
| Aal-M vs. BiA (WT)                 | -0.42 (0.07)           | < 0.001        |
| Aal-CS vs. BiA (WT)                | 0.05 (0.05)            | 0.34           |
| <b>Flight test (%)</b>             |                        |                |
| <b>Pairwise comparison</b>         | <b>Estimate (SE) *</b> | <b>p-value</b> |
| Aaeg-M vs. Bra (WT)                | -0.22 (0.19)           | 0.461          |
| Aaeg-CS vs. Bra (WT)               | -0.05 (0.19)           | 0.966          |
| Aal-M vs. BiA (WT)                 | -0.36 (0.18)           | 0.103          |
| Aal-CS vs. BiA (WT)                | 0.35 (0.19)            | 0.148          |
| <b>Male survival</b>               |                        |                |
| <b>Pairwise comparison</b>         | <b>Estimate (SE)</b>   | <b>p-value</b> |
| <b>(7 days)</b>                    |                        |                |

|                                          |                      |                       |
|------------------------------------------|----------------------|-----------------------|
| Aaeg-M vs. Bra (WT)                      | 0.00 (0.01)          | 0.764                 |
| Aaeg-CS vs. Bra (WT)                     | 0.01 (0.01)          | 0.485                 |
| Aal-M vs. BiA (WT)                       | 0.00 (0.02)          | 1.000                 |
| Aal-CS vs. BiA (WT)                      | 0.01 (0.02)          | 0.722                 |
| <b>Pairwise comparison<br/>(14 days)</b> | <b>Estimate (SE)</b> | <b><i>p</i>-value</b> |
| Aaeg-M vs. Bra (WT)                      | 0.00 (0.01)          | 0.976                 |
| Aaeg-CS vs. Bra (WT)                     | 0.01 (0.01)          | 0.625                 |
| Aal-M vs. BiA (WT)                       | 0.00 (0.02)          | 0.996                 |
| Aal-CS vs. BiA (WT)                      | 0.00 (0.02)          | 0.980                 |

\* estimated difference in logit of individuals

**Supplementary Table 2: Sequences of markers marking out and within the 63Mbp with high male-female genetic differentiation in *Ae. aegypti*.**

|                                             |                                                                                                                                                   |
|---------------------------------------------|---------------------------------------------------------------------------------------------------------------------------------------------------|
| 137972_left<br>_side_Xspe<br>_16334123<br>8 | GGAAAAGGGTTTAAAAAATAACTGCATCAACCAACTATGCAAAA<br>GCCAACTAGTACACACAGCTGACGTACAAACACTGCTGGAGACAC<br>TCAGCTTATTTTCCGCTGCAGGGTTATGTCATTGCAGGCAACACAT   |
| 220255_Xs<br>pe_166482<br>560               | TCGACCTTGGCTCGGAGTTTCCGTCGCGTTTGACCCAAAACCGGCG<br>TACATAGGAAAGCATCCGAACCAAGGTGGTCAGATTCGTTGTAACC<br>GGCGATACGGTCCATTTCCGGCAATCGCCGAAACCGGTGTTTTGG |
| 31870_right<br>_side_Xspe<br>_17462619<br>9 | CAGCCAATCCGAAAAGCAAACACAAAGCCTGCCCGAGTTCGTCTG<br>CTTTCCCGATGGGGTGCAATAGAGCAAAAGTTTCTCTTTTGTCTATG<br>CGGTGATATTTTTGCGAAACTCGCGATAGAAAGCCTTTCCTGTG  |

**Supplementary Table 3: Cumulative number of fluorescent and negative males and females between generations 3 and 6 in 11 *Ae. albopictus* lines carrying an M-linked transgene.**

Underlined numbers are observations that may correspond to recombination events or to the presence of additional, less sex-linked transgene insertions. Lines showing such events were thus discarded. The selected M-linked line (Aal-M) is the one named “4.4Y” in the table.

| <b>Line</b>         | <b>Positive males</b> | <b>Negative males</b> | <b>Positive females</b> | <b>Negative females</b> | <b>Total</b> |
|---------------------|-----------------------|-----------------------|-------------------------|-------------------------|--------------|
| <b>SM1</b>          | 181                   | 0                     | <u>3</u>                | 316                     | 500          |
| <b>SM2</b>          | 53                    | 0                     | <u>34</u>               | 25                      | 112          |
| <b>SM3</b>          | 301                   | 0                     | 0                       | 625                     | 926          |
| <b>SM5</b>          | 259                   | <u>11</u>             | <u>26</u>               | 384                     | 680          |
| <b>SM6</b>          | 22                    | 0                     | <u>1</u>                | 17                      | 40           |
| <b>SM7</b>          | 81                    | 0                     | <u>30</u>               | 63                      | 174          |
| <b>SM11</b>         | 79                    | 0                     | <u>11</u>               | 51                      | 141          |
| <b>SM12</b>         | 647                   | 0                     | 0                       | 623                     | 1270         |
| <b>1.2R</b>         | 666                   | 0                     | 0                       | 569                     | 1235         |
| <b>4.4Y = Aal-M</b> | 905                   | 0                     | 0                       | 813                     | 1718         |
| <b>5.2GR</b>        | 403                   | 0                     | 0                       | 310                     | 713          |
