# Supplementary material for: Combining two genetic sexing strains allows sorting of non-transgenic males for Aedes genetic control
Source: PubMed Central journal article supplement (PMC10275924; doi:10.1038/s42003-023-05030-7), 2023-06-16
Supplement: 42003_2023_5030_MOESM3_ESM.pdf [file 42003_2023_5030_MOESM3_ESM.pdf]

## Description of Additional Supplementary Files

**File name:** Supplementary Data 1

**Description:** 1239bp *Ae. albopictus* genomic sequence flanking the Aal-M transposon and 1647 bp *Ae. albopictus* genomic sequence flanking the Aal-m transposon

**File name:** Supplementary Data 2

**Description:** Detailed statistical outputs

**File name:** Supplementary Data 3

**Description:** Production costs and initial parameters

**File name:** Supplementary Data 4

**Description:** Plasmid and genomic integration nucleotide sequences
