# Supplementary material for: Combining two genetic sexing strains allows sorting of non-transgenic males for Aedes genetic control
Source: PubMed Central journal article supplement (PMC10275924; doi:10.1038/s42003-023-05030-7), 2023-06-16
Supplement: 42003_2023_5030_MOESM4_ESM.pdf [file 42003_2023_5030_MOESM4_ESM.pdf]

**Supplementary Data 1: 1239bp *Ae. albopictus* genomic sequence flanking the Aal-M transposon and 1647 bp *Ae. albopictus* genomic sequence flanking the Aal-m transposon.**  
Complete flanking sequences and detailed explanations can be found in Supplementary Data 4.

Aal-M:

TTAACCACGAATTCTTTTAGGGATTCTCCAGAGTCCTACCAGAAATTCATTTAGGGATAT  
CTCCAGGAAATCCTTGAGAAATTCGTCCAGGGATCCAGGAATTCCTCCAGAGTATCCTTC  
AGGCATTCCGGTCAGAAATCTTTAAGGGGTTTCATCCTCGGATTTGTTTCAGCAATCCATCC  
ATGAATTCATCAAGAATACGCTCTGCTGCTTCTGCAAATGAATCCTTTCAGAATTTTCGTCC  
TGTGATTCTTTCAGGGATATTTATTATTGAGATTATTTTTTCCGAGAAATCCTTCAAGAAG  
TTATCCATTGATTTTTTTCAAGAACTCCTCCACAAGTTTTTTTCAGGGATGTTTAGAGAGTG  
TCCTTCAATGATTCTTCCAAAAAATAGTCAAGTCACTCGTTTAGAAATTCCTTCGGCAAT  
ACCTCAAGGATTCCTTCAGCGATTGTTTTAGGACTTATCCTAGGGGTTTGTTCAAATATT  
ACATAACGCTAAGGGGGAGAGAGGGGGTCTAGCTCTGTGTTACGATTCATAACAACATTC  
TTAAAGTTTTTCATATAAAATTTGTTACGTGGGGGAGGGAGGGGGTCTTAAATTGTGAAAT  
TTTGCCTTACGTAATATTTGAAAGAACCTTAGGATTTCTTCAGGGATTCCACCAGGGACC  
TCCTTTCGAGTTTTTTTTTTGTAAGATTCTTTCAGAAATTTCTCCAAGAAATTGCCTAAA  
AATTTTCCAGGAATCTCTTAAGCAGTTCCTTCAGGGATTGTATCAGGAATTCCTATACCTA  
ATAAATCTTTCAGGGATTCTTCAAAGCAACACGCATGTTACAGAAGTGTACGGCAGTG  
CGCAAGGTTTTGTTTTCGAAAAAGTCACTGTGACCTACTTTATACAAATAAGTACCTACA  
TGCTTGAATCGCTTACAAACANTTTTTCCAGGGAAATCTATCAGGAATTCACCCAGAGAA  
AACTTTTTTGGAAATTTCCAGGGTTTGTCCGACAATTACCATAAGAAAAAGTATCAGGA  
GTTCCCTAGGAAWTCCTTCTCAAATTCCTTCATTTTGAATATATTCTAGCGATTTCGTCTA  
GGAATCCCTTCAGGTGAATTTTCAGGATTTTTTCAAGAACTTCATTATTTGCGAGTTCTCC  
GGAAATACCTCAAGAATTTCTCCAGGGATTTCTTACAGGAATACCTCGAGGGTTTCCTCT  
AGTGGTAGTTACAAGGTTTAACGAGAAGCCTTCA

Aal-m:

TTAAGCTAGTATTTACATTCTGGTTTCCGATTTAGTTTAATAAGAATCAATCCGCAAACAG  
AGATAAGATTTTGTATCCTGGCCCGAGGTAGTGGCTCACAAATGGCTCAACGCAGACCCA  
AGCAACACAGAAAACATCTTTGGACCATCAGTATTTCCAAAGATGTTTTTTAAGTGAATT  
ATAAGCGATTTCAGAAAACATCTTGTGTTAATATCCAGCTCTAATTATGCTGATCGAAAACA  
AACAACATCAAACATGTTATTGTCTATATCACGTATGAAATATGTTTATATAACTATCAGTG  
AATCAAAATTCAACCATCGCGCAACAATAATGACAATGTCGCAACCTGTATTTGTTGCGA  
CAAAACAACCCATGCGACATATGTTTGTCCCAACTTGAAAATAATGGGATTAACATCGTA  
CACCACGAGTTTAGAGATTTTAAGCCTTGCATTGCGATTTTCGAACGGTTACTTCGAGTC  
GGTAAACACTGCAACTCTGGTGAAGCTCTATCATCAAACAGTTTCGACTTTGGATTAGTA  
ATAATTGATTATTCACGAGTTGAAAAGTACGCAACAAATTCAGCTTCCGTTTTGTCTGCA  
ACAAAAAATTTTCGAGATCATGTCATTATCTGTCACCAGTAGGGATAAAGACTATCCATCA  
CATCTTCTTTGTTGCTTGTGTTTTGTGCCTCTTTTGTCTGACAATTCTCTTCACTGATAACTAT  
TATATAACAGAAACATCAAGTTGCTAATTCATATGTAAGCAAAACGCGACAGAAC  
AACAGAAAGAAGATAAAGATAAAAATAAACCAAAATGCAAACATTGTACCGTCTACCCC  
CGATGGTTTTGAACGACACCTCATGCAAACCAACGGGGTTCTTTTTTTAATTTGAACTTTT  
AGTAACCCTGTGGACATCAACAAACGTACTTTTGGTAACTTATTTGTTGTTTTGTTTTGA  
TTCTGCGTTCCGTTTCACCGCGTTCATGGGCAGAATGACGTTTGAACCATTTTTAGTTT  
GAACGATGTGCAGATTGGCGGGGGTCAAATTAATAAAGTGTTCAGATTAGATGCTGTCAA

ACCAATGGGGGTAGACGGTATGCATTGATTTTAACCATTCCTAGGAGGCTCTGGTTCGATG  
GGGGAGAGTGAGTGGTTCAAGGGACCACGTCCCCACGTCCGACGAACGTCCCCGCGC  
TAATTAGGATCACCATACACAAATTTGGCCATCATCCTCAAGGCCAAAATGTACAGGCTG  
CTGATCTACCAACTGGTCTGTCGAATACTATCCAGAAACACCGCGCAACTTGTATTCCGG  
CCTATGTGAAAGAATCAGCATCCAACAGTCGGTGCTATTCCAACCTCCAGCGTGAATTCCG  
GCACTCAAACCTTCACCTCTCTGCCGTGTGCAGCATAGTTGTCCCATGTTCCAAAACAGC  
AAACTGAGAAAAACGCGTTTTAAGTTTCAGCATTGTTTCCATCTCTACGGACAAGTGTA  
ATAAAAAACACAAAATGAATCCACCATCATAGCGTTAGAATTGGTATTTATCATTGAAGTTT  
GAACAAAAGTTTCATAAACATACAATTTACTTTGATTACACGGTCCGACAAAAAATCA  
ACTTTTGTTCTGCCAGCTCTTAAATT
