# Supplementary material for: Combining two genetic sexing strains allows sorting of non-transgenic males for Aedes genetic control
Source: PubMed Central journal article supplement (PMC10275924; doi:10.1038/s42003-023-05030-7), 2023-06-16
Supplement: 42003_2023_5030_MOESM7_ESM.pdf [file 42003_2023_5030_MOESM7_ESM.pdf]

## Combining two Genetic Sexing Strains allows sorting of non-transgenic males for *Aedes* genetic control

Célia Lutrat, Myriam Burckbuchler, Roenick Proveti Olmo, Rémy Beugnon, Albin Fontaine, Omar S. Akbari, Rafael Argilés-Herrero, Thierry Baldet, Jérémy Bouyer, Eric Marois

### Supplementary Data 4: Plasmid and genomic integration nucleotide sequences

1. pX4 plasmid used for CRISPR/Cas9 knock-in of a Pub-GFP cassette into exon 6 of the *Aedes aegypti* M-linked gene AAEL019619 (Addgene #183903)
2. Nucleotide sequence of three gRNA expression cassettes, each under the control of a different *Aedes aegypti* U6 promoter, used to knock-in the pX4 GFP cassette in the *Ae. aegypti* M locus (Addgene #183912, #183913, #183914)
3. pX3 plasmid used for CRISPR/Cas9 knock-in into the *Aedes aegypti* m-linked gene AAEL019619 (Addgene #183904)
4. ppBAalbNixE1E3E4 PUB-YFP plasmid that produced M-linked *piggyBac* insertion Aalb-M on *Aedes albopictus* chromosome 1 (Addgene #173666)
5. *piggyBac* plasmid containing *Cas9* under control of the *Exuperentia* promoter, used to obtain the m-linked m-albR9 *Ae. albopictus* line (Addgene #183905)
6. pENTR PUB-OptpB Transposase helper plasmid expressing a hyper-active, codon-optimized and NLS-modified *piggyBac* transposase under the control of the *Ae. aegypti* Polyubiquitin promoter
7. pattBPUB-GFP, attB site-containing plasmid expressing *GFP* under control of the *Ae. aegypti* PUB promoter, inserted in the m-linked attP site of *Ae. albopictus* strain mX1 derived from m-albR9 (Addgene #183911)
8. Helper plasmid (*piggyBac* construct) used to express PhiC31 integrase under control of the PUB promoter (Addgene #183966)
9. Genomic sequence flanking the Aal-M insertion on the 3' *piggyBac* side.
10. Genomic sequence flanking the Aal-m insertion on the 3' *piggyBac* side.

# 1. pX4 plasmid used for CRISPR/Cas9 knock-in of a Pub-GFP cassette into exon 6 of the Aedes aegypti M-linked gene AAEL019619

LOCUS pX4 6785 bp DNA circular 19-MAY-2021

FEATURES Location/Qualifiers

misc\_feature complement(603..727)

/note="attR4"

misc\_feature complement(5090..5108)

/note="pDONR-RP"

misc\_feature 537..552

/note="M13F"

misc\_feature complement(5046..5064)

/note="M13R"

exon 1666..1738

/note="exon\_id=AAEL019619-RC-E5.1"

exon 1666..1738

/note="exon\_id=AAEL019619-RA-E6.1"

misc\_feature complement(1737..1738)

/note="gRNA1 X4 "

CDS 1666..1687

/gene="AAEL019619.1"

/protein\_id="AAEL019619-PC"

/note="transcript\_id=AAEL019619-RC"

/db\_xref="RefSeq\_peptide:XP\_021708495.1"

/db\_xref="RefSeq\_peptide:XP\_021708495.1"

/db\_xref="RefSeq\_dna:XM\_021852803.1"

/db\_xref="Uniprot/SPTREMBL:A0A1S4FXT0"

/db\_xref="Uniprot/SPTREMBL:Q16KX0"

/db\_xref="GO:0005856"

/db\_xref="GO:0030036"

/db\_xref="UniParc:UPI000B789663"

/translation="MPFVQRVVTPKYVARSTKPSHSRGTAALPVQDYELEAITNLTLS

NALRQLASLVLISNQIFTELNKELASVSERSLGIKQRIDNLSKRVEEFDPKQVAVPES

DLVAFSQIKNHYSTKYHIDTCLFTAETRTETLQELYDAAAKTPVSAIAEMDRIAGYNE

SDHLGSDAFLCTPVLGQTRRKLRAKVDMDIETRLPSAVEDLRKWTSIEAIGDTTVPPD

CTVRLTGNQSVILGNVSQNASPSYQAGTSASFDETDIIMVDSSSRGLGREQDTPLDH

RLPSPEEQCMIALKFP AETIKVDTSGKRFDRMCATRKSLLHFVSTSEQAETNAAGGQ

QADGSDGDTIRRRSRPRRSRGKRRNTIAGTDQKEIAEVVNNGLSTFVP"

/dnas\_title="AAEL019619.1"

misc\_feature 778..1738

/note="X4 5%82%C4%F4flk region"

misc\_feature 1922..2637

/note="GFP"

misc\_feature 1739..1740

/note="perfect intron splice acceptor site!"

misc\_feature complement(1753..1921)

/note="Dm beta-Tub56D terminator"

misc\_feature complement(1808..1813)

/note="polyA site"

misc\_feature 1739..1752

/note="PRESERVED"

misc\_feature 1739..1920  
     /note="gBlock"  
 misc\_feature complement(2643..3998)  
     /note="PUB promoter"  
 misc\_feature 4024..4053  
     /note="intron"  
 misc\_feature 4063..4081  
     /note="gRNA2 X4"  
 variation 4464..4464  
     /replace="A/C"  
     /db\_xref="VBP0000121:supercont1.93:2165054"  
 exon 4054..4137  
     /note="exon\_id=AAEL019619-RC-E5.1"  
 misc\_feature complement(4054..4070)  
     /note="gRNA1 X4 "  
 mRNA 4054..4137  
     /gene="AAEL019619.1"  
     /standard\_name="AAEL019619-RC"  
     /dnas\_title="AAEL019619.1"  
 variation 4720..4720  
     /replace="G/A"  
     /db\_xref="VBP0000177:AX-93227275"  
 misc\_feature 4054..5018  
     /note="X4 5%82%C4%F4 flk"  
 source 1..6785  
     /dnas\_title="knockin plasmid X4"

ORIGIN

1 CTTTCCTGCG TTATCCCCTG ATTCTGTGGA TAACCGTATT ACCGCCTTG AGTGAGCTGA  
 61 TACCGCTCGC CGCAGCCGAA CGACCGAGCG CAGCGAGTCA GTGAGCGAGG AAGCGGAAGA  
 121 GCGCCCAATA CGCAAACCGC CTCTCCCCGC GCGTTGGCCG ATTCATTAAT GCAGCTGGCA  
 181 CGACAGGTTT CCCGACTGGA AAGCGGGCAG TGAGCGCAAC GCAATTAATA CGCGTACCGC  
 241 TAGCCAGGAA GAGTTTGTAG AAACGCAAAA AGGCCATCCG TCAGGATGGC CTTCTGCTTA  
 301 GTTTGATGCC TGGCAGTTTA TGGCGGGCGT CCTGCCCGCC ACCCTCCGGG CCGTTGCTTC  
 361 ACAACGTTCA AATCCGCTCC CGGCGGATTT GTCCTACTCA GGAGAGCGTT CACCGACAAA  
 421 CAACAGATAA AACGAAAGGC CCAGTCTTCC GACTGAGCCT TCGTTTTAT TTGATGCCTG  
 481 GCAGTTCCCT ACTCTCGCGT TAACGCTAGC ATGGATGTTT TCCCAGTCAC GACGTTGTAA  
 541 AACGACGGCC AGTCTTAAGC TCGGGCCCCT ACAGGTCACT AATACCATCT AAGTAGTTGA  
 601 TTCATAGTGA CTGGATATGT TGTGTTTTAC AGTATTATGT AGTCTGTTTT TTATGCAAAA  
 661 TCTAATTTAA TATATTGATA TTTATATCAT TTTACGTTTC TCGTTCAACT TTTCTATACA  
 721 AAGTTGGTAC CGGGCCCCC GCTAGCGTCG ACGGTATCGA TAAGCTTGAT *cggatcc*GCT  
 781 CCGTTGATTG ATGAATCATT GATTCAGTAA CTTAGTTGAT CAATAACTCT AACACGAAAA  
 841 TTACGGATAT AATTTGTA TTTTCAATTT TGAGGGTTTT GTTAGATGAA CTTTGATTTA  
 901 AGATCTTGTT TCGTAGGAAG ATAAATGTCA CAATCATTGT TTTGCAATAC CCTATTATTG  
 961 ATATAAAAAA TCTGAAATTT TTTTAAATTT AGTTTATAGG CACTCGTTGT TTACGAAATA  
 1021 TGATGCAAAA TTCAGTTTAT TATAAAAAAG TTTTTTATT TTCGAATTAG GGTAGCATCC  
 1081 CAAATTATGT CACGCTAAAT TTCAACTTTT TCGACCCCCT TCCCTCCTCT ACTTTGTCAC  
 1141 ATTTTTTGTA TGAGTCCTCC GAAAATTTTG TAAGGCTTGA CCCCCTCCAC CCCTCTTAAA  
 1201 GCGTGACGTA ATTTGTGCAT GACCCCTTAG ATAGAAATGT TGAAAACCTA TCAACATAAA  
 1261 TCTGGGCAAA ACTTCAATCA AAATAAATGC AATGTACACT GAACAGGTAA GTGTAGGAGG  
 1321 TAAGAAAAGA TAGCTAAAAA AAACTCGACT CGACTTGATG ATGGTTTTGA AAAA ACTCAA  
 1381 AAACGACATG TAACAATAAA GGTAAGTATT GAATGGATAC TTGTATACAA AGTACTTTGA

1441 AGTTCAATTC TTGTTGAAAT TGAAGTGTCT TCCATAACAT TTATTCTTAA AACTAAATT  
1501 TCTAAGTTTT AACGGCATT CGTGGTGC GC ACTGAAGTTG TTCTCTTTTC TCCTGATACA  
1561 TAACTCACAT GTAGCTCTGA TGTTGAAACA CTTTCATATC TATCATTAAG TCAGCAATCT  
1621 CAGGACAATT TTCATCATAT TTTTTCTCTT GTATTTTTTC AACAGGTTAT CTACATTCGT  
1681 CCCCTGATGA GTACGTTCAA TATTATGGAC CACAAACTCA CACATACACG CTTCCCAGGT  
1741 AaGTTCCCTAT ACgaaacccc aacaaaaacc ataattggtt AACTTGTGA ACAAATTGG  
1801 ATCCGACTTT ATTGATTACG TTGTTAAGAG AACAAATCTT TTACAAGTGA ATTCATTTGT  
1861 TCTCGTTTCA TTTTTTTTCG CAAAACATTG ATCGAGAATT CGATTGATTT CCGATTCGAA  
1921 TTTACTTGTA CAGCTCGTCC ATGCCGAGAG TGATCCCAGG GCGGGTCACG AACTCCAGCA  
1981 GGACCATGTG ATCGCGCTTC TCGTTGGGGT CTTTGCTCAG GCGGACTGG GTGCTCAGGT  
2041 AGTGGTTGTC GGCAGCAGC ACGGGGCCGT CGCCGATGGG GGTGTTCTGC TGGTAGTGGT  
2101 CGGCGAGCTG CACGCTGCCG TCCTCGATGT TGTGGCGGAT CTTGAAGTTC ACCTTGATGC  
2161 CGTCTTCTG CTTGTCGGCC ATGATATAGA CGTTGTGGCT GTTGTAGTTG TACTCCAGCT  
2221 TGTGCCCCAG GATGTTGCCG TCCTCCTTGA AGTCGATGCC CTTAGCTCG ATGCGGTTCA  
2281 CCAGGGTGTG GCCCTCGAAC TTCACCTCGG CGCGGGTCTT GTAGTTGCCG TCGTCCTTGA  
2341 AGAAGATGGT GCGCTCCTGG ACGTAGCCTT CGGGCATGGC GGACTTGAAG AAGTCGTGCT  
2401 GCTTCATGTG GTCGGGGTAG CGGCTGAAGC ACTGCACGCC GTAGGTCAGG GTGGTCACGA  
2461 GGGTGGGCCA GGCACGGGC AGCTTGCCGG TGGTGCAGAT GAACTTCAGG GTCAGCTTGC  
2521 CGTAGGTGGC ATCGCCCTCG CCCTCGCCGG ACACGCTGAA CTTGTGGCCG TTTACGTGCG  
2581 CGTCCAGCTC GACCAGGATG GGCACCACC CGGTGAACAG CTCCTCGCCC TTGCTCAcca  
2641 tgGTTGAAAT CTCTGTTGAG CAGAAAAAGA AACGAGGAAA CGCTTCAGTA ATTGGTTGTG  
2701 AAATGCAAAC TCTCATTTGA TATTGATTCA TTGCCTTTGG CTTGAGCAC GACACGACAG  
2761 GTTTTAAACT TGTTTTGCTT TGTCTGCGTT TGCAGTCGCA GGCCAAGTGA AAAATATACA  
2821 CTTGAAGGTG ATGACGTCAC AACACGCC TACTTTTTAG TGAAAAATTA ACTTGTTTTC  
2881 GACTTTGAAC TACGTAGTTT GGAAATTGCG TATCTTCAAG TTTTCACGAT TTCCTCAAGG  
2941 TTTTCTCGA TATGTGTAA TATTACCTTA ATGGGTAATT ATCACCACAA TATTTAATTT  
3001 TAGAAATATG GCGAATTCGC GCTTGCTCTA GAAATTTAAT TCAATTAGCA GCGATGATTC  
3061 AACGAAATAT GATTATCGCC GTGAATCACA ATTGGGTTTT ATCAATGATG ATGAAACTGC  
3121 GTTGCAAATT TCACTAATC ACTCAAAGCT CAATAGTCGC CATCTTGAA AATAGTTTGC  
3181 TCATTCAAAG ACAAAGGAAT CATTACCAA ACTAGTTTTC GTCATAGCT ATAATTTTCA  
3241 CATTTAATTT ACCTACCTC ACTAGAAGAT TCCCTTACC GAAATGCACT TTCACAAATT  
3301 TAATAGTAAT TGTCCTTTGA ACAAAGCTTT GTTCACTCTG AAATTTTCTC CTCTGGCTAA  
3361 TTGGATCACT CTTTTTCACT AGAGACTTCA CTTCACTTGC ACTGGCACTG CTTACTTGG  
3421 CCGCGTAATG TTCACTCCAC TAGGAAACGT ATTCGATTGA GCTGGTTTTG CCTTTGCAGG  
3481 GGCGTTTTAT AGACACTGCC GTAGTGGTGG TTGTACTTCT AGAAAATTTT TGCAATCCAT  
3541 TCATACATAT ACCTCTGTTT GGTGGATGG CTCTAAATCG ATCGACTATG GGTACCATCC  
3601 CTGTGTCTGA ATGGACAGCA AAACGTGCTT GTGTCTGTTA GTCGTTTATT CTGTACCTTG  
3661 AACGATGCAG TTCAACTTCT GGCAAAGACG TCAATGTACC TACCATTCGT GTATATGGCA  
3721 TACAGAGAAA GATGTGCGAA TGCCTTTTTT GATAGAGAAA GGATTTCTG ATTTGATCGA  
3781 CAATTTCCGGT AGCTATTCTT AGCTTCGAAT GTAATCTGAT AACCAAATCC AGAGACAAAG  
3841 CAGTAATTTG GGAATTTTAC TTGAATCATT CTAATTGTAT CATTGCTGT ATTAGTGCAG  
3901 TCAGCAAAGT GACGTCAACC CTCTAAATC GATATACTT TGGGAAGCTT TCTTTCTTGT  
3961 CTGGCTCAGC TGGTGCCAAG GCAAATTATA ATTGGATTCA ATGCACAAGC TACATGTAAA  
4021 GATCTTTTCT ACGCCTACCC CCTCGGACAA CAGGCGiCCC ATGATTCATC AATCAACGGA  
4081 GCGaCCTCAT AGAAATATTA CGCCAACTGG AATACCAATG GCATCCAGAC ATATCTATGG  
4141 GTATGACGCC CAAGTTGACA ATAATGCAAG CACATTCCAC CGGAACAACG ATATGTAAGT  
4201 GACCTTGCAA ACTCGTCGTC GACCAATTCC AATGGACCAG CCGAATATGC GTGAAGCTCT  
4261 TAATTTATCC CAGCAGAGCG TTAGACCAAT AGAAGAACTC TATTCAACAC CAAACAAGAT  
4321 CAAATCAAAT GCACTGAAAA CTACACCAAC TGGGTTTGT ACGTACTTTT CTCCTATCGC  
4381 TAAAAGTAAC ACGGGTGGTG AATTAAACGA CGATGTGGAT AGCAGTTTTA AGATTTCTCC  
4441 GATCGACCCT CGGAGTATTG CTCATTTCAA AACATCTACT CCGTCAAAAC CAAACGAGAC

4501 ATCACTTTCT CCTACAAGAT CGCTTACCGA AGAGCTTCGA TATAGATTAA GACTGCAACA  
4561 GGTCGGAGTT CGATCACATG GGAATTCTCC GGTAAGCTCC GGCCGTTCAA CACCAAAAAA  
4621 CGTACTTGAA GCACAAGCTC CACGTGGCAG ACACAGTTGG GCTTCCAACA GTACCGACAT  
4681 TCCACAGACA TGCTCTGATC GACTTGGGAC ACCAAAAACG AGCCTTATGG ATTTCAAAAA  
4741 GTTGCTTCTT GCGCATGGAT CGAAATCTAA TATTTCTGTCT GGAAGTAAAA TTTCTGCCGT  
4801 TGAACTACTT AAGAAATCAA AAAGTAACGC TCCAGTAAAC CCAGTTTCTC CAGTTACAAA  
4861 AACTTCTGCA AATAGTAGTT TGAATATTTT GGACCTTTCG GGATCTCCAA AAACATTCGC  
4921 TACAAGACGC ATGATTTCGAC AAGGAAACTT TGAAATGGT TCACCATCAA AGCTCGGTAA  
4981 TGTGTCTAAA CATTCTTCAA GGGGTGGTTG GCGGTACA<sub>gc</sub> ttATCCCCTA TAGTGAGTCG  
5041 TATTACATGG TCATAGCTGT TTCCTGGCAG CTCTGGCCCG TGTCTCAAAA TCTCTGATGT  
5101 TACATTGCAC AAGATAAAAA TATATCATCA TGAACAATAA AACTGTCTGC TTACATAAAC  
5161 AGTAATACAA GGGGTGTTAT GAGCCATATT CAACGGGAAA CGTCGAGGCC GCGATTAAAT  
5221 TCCAACATGG ATGCTGATTT ATATGGGTAT AAATGGGCTC GCGATAATGT CGGGCAATCA  
5281 GGTGCGACAA TCTATCGCTT GTATGGGAAG CCCGATGCGC CAGAGTTGTT TCTGAAACAT  
5341 GGCAAAGGTA GCGTTGCCAA TGATGTTACA GATGAGATGG TCAGACTAAA CTGGCTGACC  
5401 GAATTTATGC CTCTTCCGAC CATCAAGCAT TTTATCCGTA CTCCTGATGA TGCATGGTTA  
5461 CTCACCACTG CGATCCCCGG AAAAACAGCA TTCCAGGTAT TAGAAGAATA TCCTGATTCA  
5521 GGTGAAAATA TTGTTGATGC GCTGGCAGTG TTCCTGCGCC GGTTGCATTC GATTCTGT  
5581 TGTAATTGTC CTTTAAACAG CGATCGCGTA TTTCGTCTCG CTCAGGCGCA ATCACGAATG  
5641 AATAACGGTT TGGTTGATGC GAGTGATTTT GATGACGAGC GTAATGGCTG GCCTGTTGAA  
5701 CAAGTCTGGA AAGAAATGCA TAACTTTTGG CCATTCTCAC CGGATTCAGT CGTCACTCAT  
5761 GGTGATTTCT CACTTGATAA CTTATTTTTT GACGAGGGGA AATTAATAGG TTGTATTGAT  
5821 GTTGGACGAG TCGGAATCGC AGACCGATAC CAGGATCTTG CCATCCTATG GAACTGCCTC  
5881 GGTGAGTTTT CTCCTTCATT ACAGAAACGG CTTTTTCAA AATATGGTAT TGATAATCCT  
5941 GATATGAATA AATTGCAGTT TCATTTGATG CTCGATGAGT TTTTCTAATC AGAATTGGTT  
6001 AATTGGTTGT AACACTGGCA GAGCATTACG CTGACTTGAC GGGACGGCGC AAGCTCATGA  
6061 CAAAATCCC TTAACGTGAG TTACGCGTCG TTCCACTGAG CGTCAGACCC CGTAGAAAAG  
6121 ATCAAAGGAT CTTCTTGAGA TCCTTTTTTT CTGCGCGTAA TCTGCTGCTT GCAAACAAAA  
6181 AAACCACCGC TACCAGCGGT GGTTTGTGTT CCGGATCAAG AGCTACCAAC TCTTTTTCCG  
6241 AAGGTAAGT GCTTCAGCAG AGCGCAGATA CCAAATACTG TTCTTCTAGT GTAGCCGTAG  
6301 TTAGGCCACC ACTTCAAGAA CTCTGTAGCA CCGCCTACAT ACCTCGCTCT GCTAATCCTG  
6361 TTACCAGTGG CTGCTGCCAG TGGCGATAAG TCGTGTCTTA CCGGGTTGGA CTCAAGACGA  
6421 TAGTTACCGG ATAAGGCGCA GCGGTCGGGC TGAACGGGGG GTTCGTGCAC ACAGCCCAGC  
6481 TTGGAGCGAA CGACCTACAC CGAACTGAGA TACCTACAGC GTGAGCTATG AGAAAGCGCC  
6541 ACGTTCCCG AAGGGAGAAA GGCGGACAGG TATCCGGTAA GCGGCAGGGT CGGAACAGGA  
6601 GAGCGCACGA GGGAGCTTCC AGGGGAAAC GCCTGGTATC TTTATAGTCC TGTCGGGTTT  
6661 CGCCACCTCT GACTTGAGCG TCGATTTTTG TGATGCTCGT CAGGGGGGCG GAGCCTATGG  
6721 AAAACGCCA GCAACGCGGC CTTTTACGG TTCCTGGCCT TTTGCTGGCC TTTTGCTCAC  
6781 ATGTT

//

## 2. Nucleotide sequence of three gRNA expression cassettes, each under the control of a different *Aedes aegypti* U6 promoter, used to knock-in the pX4 GFP cassette in the *Ae. aegypti* M locus

LOCUS Plasmid1243 632 bp ds-DNA linear SYN 13-OCT-2021

DEFINITION synthetic DNA fragment

ORGANISM synthetic DNA construct

REFERENCE 1 (bases 1 to 632)

FEATURES Location/Qualifiers

source 1..632

/organism="synthetic DNA construct"

/mol\_type="other DNA"

misc\_feature 8..481

/label=promoter of Chr1 U6 AAEL017702

/note="promoter of Chr1 U6 AAEL017702"

misc\_feature 421..433

/label=Conserved atccatcgctaga

misc\_feature 455..460

/label=TATA

misc\_feature 482..504

misc\_feature 505..590

/label=pX330 chimeric guide RNA scaffold

/note="pX330 chimeric guide RNA scaffold"

misc\_feature 505..515

/label=CRISPR end

/note="CRISPR end"

misc\_feature 510..540

/label=mutations to optimize gRNA according to

/note="mutations to optimize gRNA according to Dang et al."

misc\_feature 525..590

/label=tracer

/note="tracer"

misc\_feature complement(574..590)

/label=EM334

/note="EM334"

misc\_feature 591..595

/label=U6 Aedes - AAEL017702

ORIGIN

```
1 ggtctcattc catagtaaatactactacaaa taatattaat gttccatgaa aaaaggagta
61 agagtctgggta accctagtg cagcacaata tctcgcgggc atatttggtt gctgaggat
121 atttatatt gaacccatg agaaaaagcg gaagaaattg gctcatggcc gatttaagg
181 atatttaaaa attgtacaat gtacatataa taaacatcc gttcctcaa tgtgttcttt
241 ttttaagcg tgtgttaaaa gtttgcctg gtggtgaatt cacgctctac ccgttcaggc
301 agcattcatc gaaaagccct atctgctcgc acacatttac aaaatgctga ttgcgttg
361 tgetgaatgg gtcactcgc cgtcactgct tgetgtgtac actgtacagt tacgcagtct
421 gtgcatcgtc agaatcatat ttacggaaaa gtattatata taccaatgc gttgctcatc
481 ggttgggca tagcgcggtg tggagtcca gagctatgct gaaacagca tagcaagtgg
541 aaataaggct agtccgttat caactgaaa aagtggcacc gagtcggtgc tttttgtg
601 gttttattat tcgataattg tggatagaga cc
```

//

LOCUS Plasmid1244 520 bp ds-DNA linear SYN 13-OCT-2021

DEFINITION synthetic DNA fragment

SOURCE synthetic DNA construct

ORGANISM synthetic DNA construct

REFERENCE 1 (bases 1 to 520)

FEATURES Location/Qualifiers

source 1..520

/organism="synthetic DNA construct"

/mol\_type="other DNA"

misc\_feature 8..328

/label=pU6 promoter Chr3 AAEL017905 Konet2007

/note="pU6 promoter Chr3 AAEL017905 Konet2007"

misc\_feature 288..301

/label=conserved

misc\_feature 322..327

/label=TATA

misc\_feature 329..350

/label=this section from AAEL017774 U6

/note="this section from AAEL017774 U6"

misc\_feature 351..372

/label=Linker

misc\_feature 373..458

/label=pX330 chimeric guide RNA scaffold

/note="pX330 chimeric guide RNA scaffold"

misc\_feature 373..383

/label=CRISPR end

/note="CRISPR end"

misc\_feature 378..408

/label=mutations to optimize gRNA according to

/note="mutations to optimize gRNA according to Dang et al."

misc\_feature 393..458

/label=tracer

/note="tracer"

misc\_RNA 459..463

/label=AAEL017905-RA

/note="snRNA"

ORIGIN

1 ggtctcactc taattggagc tgccagacaa atttgattg tccgtgcggt atgcatatgt

61 acctacttac gtctgtcgtt ttgtctccgt ttaccgggag gaaagtctg gaaacatgga

121 aactctatag ttgccaggta gaccatctgc ctccgtcggc tggttgatt ccaattgaa

181 tattggctaa ttggaagaga tggagtttt tgaatggatg attgaataat tgaagcgact

241 ccgggtacct gtttgaagc tetgcaacag tgccatagat tcgtgtcagt ccatcactag

301 aatcaaata acttgtactt gatataaag agcagaggca agagtagtga aatgtcttaa

361 atgaaagagg cggtttcaga gctatgctgg aaacagcata gcaagttgaa ataaggctag

421 tccgttatca acttgaaaaa gtggcaccga gtcggtgctt ttttacaaa tctattatgc

481 atgaggtact atgtggcag agtaatgaat tccagagacc

//

LOCUS Plasmid1245 530 bp ds-DNA linear SYN 13-OCT-2021

DEFINITION synthetic DNA fragment

SOURCE synthetic DNA construct  
 ORGANISM synthetic DNA construct  
 REFERENCE 1 (bases 1 to 530)  
 FEATURES Location/Qualifiers  
     source 1..530  
         /organism="synthetic DNA construct"  
         /mol\_type="other DNA"  
     misc\_feature 8..364  
         /label=U6 prom from Chr3 AAEL017763  
         /note="U6 prom from Chr3 AAEL017763"  
     misc\_feature 304..317  
         /label=Conserved  
     misc\_feature 337..342  
         /label=TATA  
     misc\_feature 365..386  
         /label=Linker  
     misc\_feature 387..472  
         /label=pX330 chimeric guide RNA scaffold  
         /note="pX330 chimeric guide RNA scaffold"  
     misc\_feature 387..397  
         /label=CRISPR end  
         /note="CRISPR end"  
     misc\_feature 392..422  
         /label=mutations to optimize gRNA according to  
         /note="mutations to optimize gRNA according to Dang et al."  
     misc\_feature 407..472  
         /label=tracer  
         /note="tracer"  
     misc\_RNA 473..477  
         /label=U6 AAEL017763-RA  
         /note="snRNA"

ORIGIN

1 ggtctcatgt tcgttctca acacctctcc atggtgataa cggatcggg ttattgtca  
 61 gcatccatcc tccgaaaaat acattacgcc tgaatatg caatcgcaa cacggatctg  
 121 ttggaacat ttatttact atgaagatg cgcgatagga atatttatt gagcgttaa  
 181 gatactcatt gttctctcaa agaatgtcat tgaagccaa cgaggcaaa tcaatatta  
 241 taataaaaag gtcaaagagg actaactaa agctctcttt atggatagga aaaaatatt  
 301 tcgccatcg ctgaacttt taccgttcc atgagatata taactaagat gaatgaggct  
 361 aattgatgta tcatgcgtat tgcgagggtt cagagctatg ctggaacag catagcaagt  
 421 tgaataagg ctagtccgtt atcaactga aaaagtggca ccgagtcggg gctttttaa  
 481 gatgctcgg caattaataa taaggaatgg taaagcattc tctagagacc

//



### 3. pX3 plasmid used for CRISPR/Cas9 knock-in into the *Aedes aegypti* m-linked gene AAEL019619

LOCUS pX3 6628 bp ds-DNA circular SYN 20-NOV-2019  
DEFINITION synthetic circular DNA  
FEATURES Location/Qualifiers  
terminator 268..295  
/label=rrnB T2 terminator  
/note="transcription terminator T2 from the E. coli rrnB gene"  
terminator 387..473  
/gene="Escherichia coli rrnB"  
/label=rrnB T1 terminator  
/note="transcription terminator T1 from the E. coli rrnB gene"  
primer\_bind 537..553  
/label=M13 fwd  
/note="common sequencing primer, one of multiple similar variants"  
misc\_feature 774..1707  
/label=X3 5' flk region  
misc\_feature complement(1721..1889)  
/label=DmTub56Dterm  
CDS complement(1890..2609)  
/codon\_start=1  
/product="the original enhanced GFP (Yang et al., 1996)"  
/label=EGFP  
/note="mammalian codon-optimized"  
/translation="MVSKGEELFTGVVPILVELDGDVNGHKFSVSGEGEGDATYGKLT  
LKFICTTGKLPVPWPTLVTTLTLYGVQCFSRYPDHMKQHDFFKSAMPEGYVQERTIFFKDD  
GNYKTRAEVKFEGDTLVNRIELKGIDFKEDGNILGHKLEYNYNSHNVYIMADKQKNGIK  
VNFKIRHNIEDGSVQLADHYQNTPIGDGPVLLPDNHYLSTQSALS KDPNEKRDHMVLL  
EFVTAAGITLGMDELYK"  
misc\_feature complement(2610..3986)  
/label=AePUB promoter  
misc\_feature 3987..4861  
/label=X3 3' flk region  
promoter complement(4870..4888)  
/label=T7 promoter  
/note="promoter for bacteriophage T7 RNA polymerase"  
primer\_bind complement(4893..4909)  
/label=M13 rev  
/note="common sequencing primer, one of multiple similar variants"  
CDS 5022..5831  
/codon\_start=1  
/gene="aph(3')-Ia"  
/product="aminoglycoside phosphotransferase"  
/label=KanR  
/note="confers resistance to kanamycin in bacteria or G418 (Geneticin(R)) in eukaryotes"  
/translation="MSHIQRETSRPLNSNMDADLYGYKWARDNVGQSGATIYRLYGKP"

DAPELFLKHGKGSVANDVTDEMVRNLNWLTEFMPLPTIKHFIRTPDDAWLLTTAIPGKTA  
FQVLEEYPDSGENIVDALAVFLRRLHSIPVCNCPFNDRVFLAQAQSRMNNGLVDASD  
FDDERNGWPVEQVWKEMHKLLPFSPDSVVTHGDFSLDNLIFDEGKLGICIDVGRVGIAD  
RYQDLAILWNCLGEFSPSLQKRLFQKYGIDNPD MNKLQFHLMLDEFF"

rep\_origin 5978..6566

/direction=RIGHT

/label=ori

/note="high-copy-number ColE1/pMB1/pBR322/pUC origin of replication"

## ORIGIN

1 ctttctcgctg ttatccctcg attctgtgga taaccgtatt accgcctttg agtgagctga  
61 taccgctcgc cgcagccgaa cgaccgagcg cagcgagctca gtgagcggagg aagcgggaaga  
121 gcgccaata cgcaaaccgc ctctccccgc gcgttgcccg attcattaat gcagctggca  
181 cgacaggttt cccgactgga aagcgggagc tgagcgcgaac gcaattaata cgcgtaccgc  
241 tagccaggaa gagttgtag aaacgcaaaa aggccatccg tcaggatggc ctctgctta  
301 gtttgatgcc tggcagttta tggcgggct cctgcccgc accctccggg cegtgtctc  
361 acaactgta aatccgctcc cggcggattt gtcctactca ggagagcgtt caccgacaaa  
421 caacagataa aacgaaaggc ccagtctcc gactgagcct tctgtttat ttgatgctg  
481 gcagttccct actctcgcgt taacgctagc atggatgttt tcccagtcac gacgttata  
541 aacgacggcc agtcttaagc tcgggccct acaggtcact aataccatct aagtagtga  
601 ttcatagta ctggatagt tgtgtttac agtattatgt agtctgttt ttatgcaaaa  
661 tetaattaa tataattgata ttatatcat ttacgttcc tegtcaact ttctataca  
721 aagttgtag cgggcccccc gctagcgtc acggtatcga taagcttgat cggatccgga  
781 gactacgttc cgaatgccga agtaaaaact accaagaaaa tcaacacag cggtgccgtt  
841 tactattcaa acgatgtgtt aaacgtaat ttagccacag tctctcggg aaatctaac  
901 gaagaaaccg aatattgata ctgaaatgaa ttgccgtgca atatgcgatg cgagagcaat  
961 gttctctcgc aaaacgacac cctcctggc ggaagcggaa aactgaatac ttcgggtacg  
1021 ggaggagaag caccctcggc aggagaaaac aacgaacatg ctataaaaag ggggtcacgc  
1081 gtgaaactgg atgcgcacgg taaggtatc tacagttcgg atagtctgaa gaggagaaag  
1141 ggtgcgcaca cgactttgc gccgggtcca tttgtgaaag acgtaatac ggcacagcca  
1201 ctgacgacca acactctac tacaacact acaactcggc cagcatcacc agcagcatcc  
1261 acagaaaatg gcaaatgtgc tgtgttgca tctccattac taagtgtgg tctagtaac  
1321 aggaaaccaa tagcagtaa accagtgata tcgagctccg cattgaaaac gaaagcaatc  
1381 gtaacacca atagtaatat aagtaatcat agcagcggag tggcagccca tctatggcc  
1441 ccaattgcca gattcttcc caacaacagt acggtgcaag aagtggaaaa aatagctgca  
1501 gcatcacaca tcatgtctc cggagtcta aaaggtgcat acgttaatgt acaggaatct  
1561 aaaccaccgt ctcaaaaacc tcaatcgatt cactatatgg aagcaacaaa cttacagcat  
1621 ccccaaacag gtaagcaagc taaatcgca aagaataca aatagttgg tgcctcgcca  
1681 aaggctagga acgtaatatt tctcctcggg gttctatac gaaaccccaa caaaaacct  
1741 aattgttag actgtgtaac aaaattggat ccgactttat tgattacgtt gtaagagaa  
1801 caaatcttt acaactgaat tcattgttc tegtccatt tttttcgca aaacattgat  
1861 cgagaatcg attgattcc gattcgaatt tactgtaca gctcgtccat gccgagagt  
1921 atccccggcg cggtcacgaa ctccagcagg accatgtgat cgcgcttctc gttgggtct  
1981 ttgctcaggg cggactgggt gctcaggtag tgggtgtcgg gcagcagcac ggggccgtcg  
2041 ccgatggggg tgtctgctg gtagtggtcg gcgagctgca cgctgccgc ctcgatgtg  
2101 tggcggatct tgaagtac cttgatccg ttctctgct tctcggccat gatatagac  
2161 ttgtggctgt ttagttgta ctccagctg tccccagga tgtgccgc ctcctgaag  
2221 tcatgccct tcagctgat cgggttacc aggtgtcgc cctgaaact cactcggcg  
2281 cgggtctgt agttgccgc tctctgaa aagatgggc gctcctggac gtagcctcg  
2341 ggcagcggc acttgaagaa gtcgtgctg tcatgtgtt cggggtagc gctgaagcac  
2401 tgcacgccg aggtcagggt ggtcacgagg gtgggccagg gcacggcgag cttgccggtg

2461 gtgcagatga acttcagggt cagcttgccg taggtggcat cgcctcgcc ctgcccggac  
2521 acgctgaact tgtggccgtt tacgtcgccg tccagctcga ccaggatggg caccaccccg  
2581 gtgaacagct cctcgccctt gctcaccatg gttgaaatct ctgttgagca gaaaaagaaa  
2641 cgaggaaacg cttcagtaat tggtttgaa atgcaaactc tcatttgata ttgattcatt  
2701 gcctttggct tcgagcacga cagcacaggt tftaaacttg tttgctttg tctgcgtttg  
2761 cagtcgcagg ccaagtgaac aatatacact tgaaggatg gacgtcaca caacgccta  
2821 ctttttagtg aaaaattaac ttgtttcga cttgaaacta cgtagtttg aaattgcgta  
2881 tottcaagt ttacagatt ctcaagggt tttctcgata tgtgtaata ttacctaat  
2941 gggtaattat caccacaata ttaatttta gaaatatggc gaattcgcgc ttgctctaga  
3001 aatttaattc aattagcagc gatgattcaa cgaatatga ttatcgccgt gaatcacaat  
3061 tgggtttat caatgatgat gaaactcgt tgcaatttt cactaatcac tcaagctca  
3121 atagtcgcca tcttgaaaa tagtttgcctc attcaagac aaaggaatca ttaccaaac  
3181 tagttttcgc tcatagctat aatttcata ttaatttac ctacctcac tagaagattc  
3241 ccttcaccga aatgcacttt cacaaatta atagtaattg tcctttgaac aaagctttgt  
3301 tcaactgaa atttctcct ctggctaatt ggatcactct tttcactag agactcact  
3361 tcaattgac tggcactgct tacttggacc gcgtaattgt cactccacta ggaaacgtat  
3421 tcgattgagc tggttttgcc tttcagggg cgttttatag aactgccgt agtggtggtt  
3481 gtacttctag aaaatttctg caatccattc atacatata ctctgttcgg ttggatggct  
3541 ctaaactgat cgactatggg taccatcct gtgtctgaat ggacagcaaa acgtgcttgt  
3601 gtctgttagt cgttcattct gtacctgaa cgatgcagtt caacttctgg caaagacgtc  
3661 aatgtacctc ccattcgtgt atatggcata cagagaaaga tgtgcgaatg ctttttca  
3721 tagagaaagg atttctgat ttgatcgaca atttcggtag ctattcttag cttcgaatgt  
3781 aatctgataa ccaatccag agacaaagca gtaatttggg aatttcactt gaatcattct  
3841 aattgtatca ttgtctgat tagtgcagtc agcaaagtga cgtcaacct tctaatcga  
3901 tatactctg ggaagcttcc tttctgtct ggctcagctg tgccaaggc aaattataat  
3961 tggattcaat gcacaagcta catgtaaaga cgcagatgac tcatcactt agacgtaata  
4021 aggacattga cccagatagc aattctacta tcaagcgcag gaatagctat agaaatgcga  
4081 actcgtcaa aatcgatact gatgctgca gttttaccga tttctggaa gaacatgtaa  
4141 ataaacaaga ggaacggcta cagtcctccg cgggtaagaa tgatagcaat tcatataaca  
4201 agtatacca tttcatgat caaatagcg ataaggacga tggctacgaa gaaatcagcg  
4261 atattgactt ggacaggat agcaaatcta ttgctcgttc gtttgaaga ttactcaatc  
4321 tatcagatga ggtgtttggg cttcagaaga tggatagcac tagaccagt atctggaga  
4381 agtgcaattt cgatgaatta gataccagta cagtgagaa taatgacgac gagttggaga  
4441 ttgtattacg tgacctgata cttccacac ctaccggttg tagaagaagt ttcttattc  
4501 ctcttacacc cagtaagttg actatacctt cagatggggg tcagcatcgt gctagagttc  
4561 ttgcttcag cgctaccagc aacgacaact ctacagatat ctggtgagtc ggacgttta  
4621 atataattt caatgtagt gtttaactt catttctccc aataaatcac aaaagtaca  
4681 attattgca tctagacaca ttttaata atcgcttta tcttggtctt attctattct  
4741 aattatttt gttaaataag acaatacac catgctttat aatgaaggcc attaatcaaa  
4801 aagttacaaa atgacaacca ttcaagtca tgtccgactg tggcatagcg ccgtgtggac  
4861 ggcttatccc ctatagtag tcgtattaca tggctatagc ttttctgg cagctctggc  
4921 ccgtgtctca aaatctctga tgttacattg cacaagataa aatatatca tcatgaaca  
4981 taaaactgtc tgcttacata aacagtaata caaggggtgt tatgagccat attcaacggg  
5041 aaacgtcgag gccgcgatta aattcaaca tggatgctga ttatatggg tataaatggg  
5101 ctcgcgataa tgcgggcaa tcaggtgca caatctatc cttgtatggg aagcccgatg  
5161 cgcagagtt gtttctgaaa catggcaaag gtacgcttc caatgatgtt acagatgaga  
5221 tggtcagact aaactggctg acggaattta tgctctcc gaccatcaag cattttacc  
5281 gtactctga tgatgatgg ttactacca ctgcgatccc cggaaaaaca gattccagg  
5341 tattagaaga atactctgat tcaggtgaaa atattgtga tgcgtggca gtgttctgc  
5401 gccggttga ttcgattctt gtttgaatt gtcctttaa cagcagtcgc gtattcgtc  
5461 tcgctcaggc gcaatcacga atgaataacg gtttggttga tgcgagtgat tttgatgacg

5521 agcgtaatgg ctggcctgtt gaacaagtct ggaaagaaat gcataaactt ttgccattct  
5581 caccggattc agtcgtcact catggtgatt tctcactga taaccttatt ttgacgagg  
5641 ggaaattaat aggttgatt gatgttgac gagtcggaat cgcagaccga taccaggatc  
5701 ttgccatcct atggaactgc ctgggtgagt ttctccttc attacagaaa cggcttttc  
5761 aaaaatatgg tattgataat cctgatatga ataaattgca gtttcattg atgctcga  
5821 agttttcta atcagaattg gftaattggt tgaacactg gcagagcatt acgctgact  
5881 gacgggacgg cgcaagtca tgacaaaat ccctaacgt gagttacgcg tcgtccact  
5941 gagcgcaga ccccgtagaa aagatcaaag gatcttctg agatccttt ttctgcgcg  
6001 taatctctg ctgcaaaca aaaaaccac cgtaccagc ggtggttgt ttgccggatc  
6061 aagagctacc aactctttt cgaaggtaa ctggctcag cagagcgcag ataccaata  
6121 ctgttctct agttagcgc tagttagcc accactcaa gaactctga gcaccgceta  
6181 catacctgc tctgtaatc ctgtaccag tggtctctc cagtggcgt aagtcgtgc  
6241 ttaccgggtt ggactcaaga cgatagtac cggataaggc gcagcggtc ggctgaacgg  
6301 ggggtctg cacacagccc agcttgagc gaacgacct caccgaactg agatacctac  
6361 agcgtgagct atgagaaagc gccacgctc ccgaaggag aaaggcggac aggtatccgg  
6421 taagcggcag ggtcgaaca ggagagcga cgaggagct tccaggggga aacgcctggt  
6481 atctttatg tctgtcggg ttccacc tctgactga gcgtcgatt ttgtgatct  
6541 cgtcaggggg gcggagccta tggaaaacg ccagcaacgc ggcctttta cggctcctgg  
6601 ccttttctg gcctttgct cacatgtt

//

**4. ppBAalbNixE1E3E4 PUB-YFP plasmid that produced M-linked piggyBac insertion Aalb-M on Aedes albopictus chromosome 1 (Addgene #173666)**

LOCUS AlbNixE1E2E3\_PubYFP 8956 bp ds-DNA circular SYN 22-JUN-2021  
SOURCE synthetic DNA construct  
ORGANISM synthetic DNA construct  
REFERENCE 1 (bases 1 to 8956)  
AUTHORS .  
TITLE Direct Submission  
JOURNAL Exported Friday, Jul 2, 2021 from SnapGene 5.2.5  
<https://www.snapgene.com>  
FEATURES Location/Qualifiers  
source 1..8956  
/dnas\_title="Exported"  
/organism="synthetic DNA construct"  
/mol\_type="other DNA"  
primer\_bind 4..20  
/label=M13 rev  
misc\_feature complement(61..196)  
/label=PiggyBac 5'TR  
misc\_feature 77..95  
/label=TR2  
misc\_feature complement(371..591)  
/label=attP'  
protein\_bind 427..526  
/label=phage phi-C31 attP  
protein\_bind 602..635  
/label=loxP  
misc\_feature 638..640  
/label=lac promoter  
promoter 645..2559  
/label=Nix promoter  
exon 2560..3305  
/label=Exon 1  
misc\_feature 2560..2631  
/label=5' UTR  
misc\_feature 2632..2634  
/label=Start  
exon 3306..3370  
/label=Exon 3  
exon 3371..3712  
/label=Exon 4  
misc\_feature 3471..3473  
/label=stop?  
misc\_feature 3472..3712  
/label=3' UTR  
misc\_feature 3713..3714  
/label=added to match isof 1  
misc\_feature 3719..3941

/label=SV40 term  
 polyA\_signal 3822..3904  
 /label=SV40 poly(A) signal  
 promoter 3951..5336  
 /label=PUB  
 misc\_feature 5337..6053  
 /label=YFP  
 misc\_feature 6058..6311  
 /label=SV40  
 primer\_bind 6074..6096  
 /label=EM820  
 misc\_feature 6175..6296  
 /label=SV40 polyA signal  
 protein\_bind 6352..6385  
 /label=loxP  
 misc\_feature complement(6478..6635)  
 /label=original PiggyBac 3'region  
 misc\_feature complement(6573..6591)  
 /label=TR2  
 misc\_feature 6587..6607  
 /label=direct repeat  
 misc\_feature complement(6623..6635)  
 /label=TR1  
 primer\_bind complement(6765..6781)  
 /label=M13 fwd  
 misc\_feature join(6813..8956,1..33)  
 /label=pDONR backbone  
 terminator 6946..6973  
 /label=rnB T2 terminator  
 rep\_origin complement(7303..7891)  
 /direction=LEFT  
 /label=ori  
 CDS complement(8038..8847)  
 /label=KanR  
 misc\_feature 8918..8936  
 /label=pDONR-RP

## ORIGIN

1 tgccaggaaa cagctatgac catgtaatac gacgatatga tcctgatgca gctagattaa  
 61 ccctagaag atagtctgcg taaaattgac gcatgcattc ttgaaatatt gctctctctt  
 121 tctaaatage gcgaatccgt cgctgtgcat ttaggacatc tcagtcgccg cttggagctc  
 181 ccgtgaggcg tcttgtcaa tgcggttaagt gtcactgatt ttgaactata acgaccgct  
 241 gagtcaaat gacgcatgat tatctttac gtgacttta agatttaact catacgataa  
 301 ttatattgtt atttcatgtt ctacttacgt gataactat tatatatata tttcttgtt  
 361 atagattaga tcgcctcgc gcgactgacg gtcgtaagca cccgcgtacg tgtccacccc  
 421 ggtcacaacc ccttgtgca tgtcggcgac cctacgccc caactgagag aactcaaagg  
 481 ttaccccagt tggggcacta ctcccgaaaa ccgcttctga cctgggaaaa cgtgaagccc  
 541 cggggcatcc gctgagggtt gccgccgggg ctcggtgtg tccgtcagta ctgcaggtac  
 601 cataactteg tatagcatac attatacga gttataccgg atcctcgc atttatgagta  
 661 aaggcccatt actcatatat gggtaaagt cttttgtaa aaaatgagta aatcgattta  
 721 ctataaatt ataatttca cgtgttact ttctgtctt tgttatatt ttgaactgtt  
 781 aactattttg tattatcat ttaattcata caaaattttg cgtttattt gtatgttatt

841 gcaatctacg aaaattatta atgaattttt acatgtttca aatactetta atcattttcc  
901 tectggaaaa cagaccttcc gagacgtacg tctttgaagt ttcataatg atccatgtat  
961 gaaattttcc cctccggctg ttgttcacg cgcagttgtt cctgttcttc cgttctctgt  
1021 tcttccggcg cttgaagcct tggtcagtc ggaactgtgg aaaagactga tatattttta  
1081 tttcacggtc gftaatgaaa atgatgctgt cactatggaa cttacctgca aattccatgc  
1141 tttttagcc tttctttag ctcacatga tgatttgtg ctctgtatt atcttcgagt  
1201 accaaacctt gtgaaacgga aataatccat cgtaaatgaa aattgaacgg tatcaattta  
1261 tccaggaagt acttaccgat taaaatatca atgtatttgg gaacctcgac tetaatccgc  
1321 gtgggaatcc gatggacgcg gtatcgggtca ttgaaccgga tgcgtaaggc cctcgactgg  
1381 ctatagcggg cccgtgaaaa tcaaaatata taaaatttcc cgatagtgtt atgatcaggg  
1441 gatccgcatg cggcaaggta ggccactgc tcatctttg cgagtgtgtt agtgtgactg  
1501 gcaacgcgac cagaagtcta gtcgaatcct gcttggaaat cgtttgttt tgcgatggg  
1561 ggtggcccg c gaaatcgcat tgtgtgttt gggaaggccc gctcgatgca tgttaggtag  
1621 gcgtagttg ttcgagttg acgtgcctgc accctccctg gttatgatgg cgcactaatg  
1681 cattccgaga aaagtgteta acttgaaaat tttcatccaa atatgggtaa gttcatttac  
1741 ccatgtttgg gtatagcgat tttacctata atatgggcaa attgaccgt tttcaaagg  
1801 tatattttac ccatattatg ggtaatgcat atgaaacca aatatgggta aatcaactac  
1861 tgatctatgg gtaactgat ctagcgtgt atgtttcaca cgtgacattc actggtttta  
1921 caattggctt ctttagcagt gttgggataa ttccatatta tgaatctgca tgccaaactg  
1981 ggccgaaatc caaattttca tcaattttgg tgcacgggaa cctattttaa tatcaattg  
2041 aagtttgtat gggagcgatt tgcgaaatc cccctcgtt cattttgtac tggcgggagc  
2101 tgtcaaacag ttgcctagct gtcaaaagg gatttccaat aatctctttg aattgattt  
2161 taggtatcaa aataaagttc taaaatctg aaaaaaatca tagtggctca gaaaaagggtg  
2221 ctctttcgta taaaatcaaa aatgaacac tttttcaaa atttaaaaac ccaattttcg  
2281 caaatctata gggctctgca cgaagtctc tccctctctt tcgctctcat tgagattttg  
2341 taaacaacaa ggccaggaaa tgcataaatc ccatacaaaa tcaaacagc gcagtgcctc  
2401 atatgtaaaa cacatcactc cgacgtgtaa attttttga gtgtgtatt aatcaaagtg  
2461 aataaaaata ttagtttat gacatactg tttctgagt gtagcaaaa tatgaaaaca  
2521 catttttga ctttgaatgt taagcgtgta tgctttttgt gtcaatatgt caattgttaa  
2581 acccatgta atagttttaa tttttttta atcaaatct ttttttaagt aatgtacagt  
2641 aaaagtgaac ttaatctcat taacaatcaa ttgaataca ttaaaaaata ttgcatatac  
2701 attgaaacaa tcccggcga agtatcgaaa acagatttaa ttgcaaaatt tccgtattt  
2761 ggtgaaatat ctaacttata catgaagtca tcaattcagt tttgtgatgt gaaaccggca  
2821 gttgttcgtt acagactgat gaaaagtgt aaggaatctt caagtttaca caatagtcga  
2881 tatattcaat cggttttaat agttctgcca ctgattctt cctacaataa ttactttctt  
2941 cttacaaca cttgtgtgtt ggtatacact tatacaaat ttggcatggt agatttttat  
3001 caaaaattca gtaaattagg agatatacat gcgatgaaga aagctacaaa tgcctatggt  
3061 tacattagct ttgtatcaga aagagctgca aggaccattc tggatactaa gcttacagat  
3121 atacatataa atgtacaac aatfaatcat gttacacgaa atattaacgt atgcttaata  
3181 gattttgaaa aggaatgtac atcaaatcgc gcgataaaat taacactttt atataatcgc  
3241 tcaattggaa tattcggact accatctaat ttacagaag caaaactgca cgatgaattt  
3301 tcaagctgag gaccgttcaa gaaattttgg cagcggaaac atttctgac ctttccaca  
3361 atacttata gctttgaaa atcccagag gtatgataat cctactccgc caaaaactc  
3421 cctggcgatg gaagctctc cgaaccgatc tcccagtc ggtgtcgagc tagattctgt  
3481 ttttccggg ttgagactgg tctccgggtc actggcggcc cagcagaccgt gctttccatg  
3541 acgttatcga tctagctac tctcccggcg gtggacctag cctactctga tggaaaaaat  
3601 cccagcgaag agaagttctc ccgaaaccga gaattcaatc tcgaccatcc aggtgccgag  
3661 gtcgaccag cgatccggg ttgaggttga ctccagttc actatcactc cgattaagca  
3721 taatcagcca taccacattt gttaggttt tacttcttt aaaaaactc ccacactcc  
3781 cctgaacct gaaacataaa atgaatgcaa ttgtttgtt taacttgttt attgcagctt  
3841 ataattggtta caataaagc aatagcatca caaatttcaac aaataaagca tttttctta

3901 ctgcattcta gttgtggttt gtccaaactc atcaatgtat ctaagtatcg aatccatctt  
3961 tacatgtagc ttgtgcattg aatccaatta taatttgctt tggcaccagc tgagccagac  
4021 aagaaagaaa gcttcccaga agtatacga tttagaaggg ttgacgtcac tttgctgact  
4081 gcactaatac agcaaatgat acaattagaa tgattcaagt gaaattccca aattactgct  
4141 ttgtctctgg atttggttat cagattacat tcgaagctaa gaatagctac cgaaattgtc  
4201 gatcaaatca ggaatcctt tctctatcga aaaaggcatt cgcacatctt tctctgtatg  
4261 ccatatacac gaatggtagg tacattgacg tctttgccag aagttgaact gcatcgttca  
4321 aggtacagaa tgaacgacta acagacacaa gcacgtttg ctgtccattc agacacaggg  
4381 atggtacca tagtcgatcg atftagagcc atccaaccga acagaggat atgtatgaat  
4441 ggattgcaga aattttctag aagtacaacc accactacgg cagtgtctat aaaacgcccc  
4501 tgcaaaggca aaaccagtc aatcgaatac gtttctagt ggagtgaaca ttacgcggtc  
4561 caagtaagca gtgccagtgc aagtgaagtg aagtctctag tgaanaagag tgatccaatt  
4621 agccagagga gaaaatttca gagtgaacaa agctttgttc aaaggacaat tactattaaa  
4681 tttgtgaaag tgcatttcgg tgaagggaat ctctagtga aggtaggtaa attaaatgat  
4741 gaaattatag ctatgagcga aaactagttt ggtgaatgat tctttgtct tgaatgagc  
4801 aaactattt ccaagatggc gactattgag ctttgagtga ttagtaaaa tttgcaacgc  
4861 agtttcatca tcattgataa aaccaattg tgattcacgg cgataatcat atttcgttga  
4921 atcatcgctg ctaattgaat taaatttcta gagcaagcgc gaattcgcca tatttctaaa  
4981 attaaatatt gtggtgataa ttaccatta aggtaatatt aacacatc gagaaaaacc  
5041 ttgaggaaat cgtgaaaact tgaagatagc caatttcaa actacgtagt tcaaagtcga  
5101 aaacaagta attttctact aaaaagtagg gcgttgtgt gacgtcatca cttcaagtg  
5161 tatattttc acttggcctg cgactgcaaa cgcagacaaa gcaaaaacaag tttaaacct  
5221 gtcgtgtcgt gtcgaagcc aaaggcaatg aatcaatc ataatgagagt ttgcattca  
5281 caaccaatta ctgaagcgtt tctctgttc ttttctgct caacagagat ttcaacatgg  
5341 tgagcaaggg cgaggagctg ttaccggggg tgggtcccat ctggctcag ctggacggcg  
5401 acgtaaaccg ccacaagtc agcgtgtccg gcgagggcga gggcgatgcc acctacggca  
5461 agctgacct gaagttcacc tgcaccaccg gcaagctgcc cgtgccctgg cccacctcg  
5521 tgaccactt cggctacggc ctgcagtgtc tgcgccgcta ccccgaccac atgaagcagc  
5581 acgacttct caagtcgcc atccccgaag gctacgtcca ggagcgcacc atcttctca  
5641 aggacgacgg caactacaag acccgcgccc aggtgaagtt cgaggcgcac acctggtga  
5701 accgcatcga gctgaagggc atcgacttca aggaggacgg caacatctg gggcacaagc  
5761 tggagtacaa ctacaacagc cacaactgt atatcatggc cgacaagcag aagaacggca  
5821 tcaaggtaa ctcaagatc cgccacaaca tcgaggacgg cagcgtgcag ctgcccagc  
5881 actaccagca gaacacccc atcggcgacg gccccgtgtc gctgcccagc aacctacc  
5941 tgagctacca gtccgcccag agcaaagacc ccaacgagaa gcgcatcac atgtcctgc  
6001 tggagtctg gaccgccgc gggatcactc tcggcatgga cgagctgtac aagaagcggc  
6061 cgcgactcta gatcataatc agccatacca cattttaga ggttactgc tttaaaaaac  
6121 ctcccacacc tccccgtaa cctgaaacat aaaatgaatg caattgtgt tgttaactg  
6181 tttattgcag ctataatgg ttacaataa agcaatagca tcacaaattt cacaataaa  
6241 gcatttttt cactgcattc tagttgtgtt ttgtccaaac teatcaatgt atcttagctt  
6301 gtaattctc gacgcggata tcgttaaac cgttctgtt aattctcga cataactcg  
6361 tatagcatc attatacga gttatgagct caattcgata aaagtttgt tactttatg  
6421 aagaaattt gagttttgt tttttaat aaataataa acataataa atgtttgtt  
6481 gaattatta ttgatgata agttaaata taataaact taatatct tcaattaat  
6541 aaataaacct cgatatacag accgataaaa cacatgcgtc aatttaccg atgattatc  
6601 ttaactgac tcacaatatg atfatcttc taggttaat ctactgctg gttctgcagc  
6661 gtctgagca tctcatctg ctccatcag ctgtaaaaca catttgcacc gcgagctgc  
6721 ccgtctcca cgggttcaaa aacgtgaatg aacgagcgc gctcactggc cgtcgtttta  
6781 caggggatgt ctcatatg atgaagactc ccactctgt tttgtcggg aacgctctcc  
6841 tgagttagc aaatccgcc ggagcggatt tgaactgtg gaagcaacgg cccggagggt  
6901 ggcgggcagg acgcccgc taaactgcca ggcataaac taagcagaag gccatctga



6961 cggatggcct ttttgcgttt ctacaaactc ttctggcta gcggtacgcg tattaattgc  
7021 gttgcgctca ctgcccgtt tccagtcggg aaacctgtcg tgccagctgc attaataat  
7081 cggccaacgc gcggggagag gcggtttgcg tattgggcgc tcttccgctt cctcgcctcac  
7141 tgactcgtg cgtcggctcg ttcggctgcg gcgagcggta tcagctcact caaaggcggg  
7201 aatacgggta tccacagaat caggggataa cgcaggaaag aacatgtgag caaaaggcca  
7261 gcaaaaggcc aggaaccgta aaaaggccgc gttgctggcg tttttccata ggctccgcc  
7321 ccttgacgag catcacaaaa atcgacgctc aagtcagagg tggcgaacc cgacaggact  
7381 ataaagatac caggcgttcc ccctggaag ctcctcgtg cgtctcctg ttccgacct  
7441 gccgcttacc ggatacctgt cgcctttct ccctcggga agcgtggcgc tttctcatag  
7501 ctcacgctgt aggtatctca gttcgggtga ggtcgttcgc tccaagctgg gctgtgtgca  
7561 cgaaccccc gttcagccc accgctgcgc cttatccggt aactatcgtc ttgagtcaa  
7621 cccgtaaga cagcacttat cgcactggc agcagccact ggtaacagga ttagcagagc  
7681 gaggtatgta ggcggtgcta cagagttctt gaagtgtgg cctaactacg gctacactag  
7741 aagaacagta tttggtatct gcgctctgct gaagccagtt acctcggaa aaagagttgg  
7801 tagctcttga tccggcaaac aaaccaccgc tggtagcggg ggttttttg tttgcaagca  
7861 gcagattacg cgcagaaaaa aaggatctca agaagatcct ttgatcttt ctacggggtc  
7921 tgacgctcag tggaaacgac cgtaaactc gtaagggat tttggtcatg agcttgcgcc  
7981 gtccccgcaa gtcagcgtaa tgcctgcca gtgtacaac caattaacca attctgatta  
8041 gaaaaactca tcgagcatca aatgaaactg caatttattc atatcaggat tatcaatacc  
8101 atattttga aaaagccgtt tctgtaata aggagaaaa tcaccgaggc agttccatag  
8161 gatggcaaga tctggtatc ggtctcgat tccgactcgt ccaacatcaa tacaacctat  
8221 taatttccc tcgtcaaaaa taaggtatc aagtgagaaa tcaccatgag tgacgactga  
8281 atccggtgag aatggcaaaa gtttatgcat ttcttccag acttgtcaa caggccagcc  
8341 attacgctc tcataaaaat cactcgcac aaccaaccg ttattcattc gtgattgcgc  
8401 ctgagcgaga cgaataacgc gatcgctgtt aaaaggacaa ttacaaacag gaatcgaatg  
8461 caaccggcgc aggaacactg ccagcgcac aacaatattt tcacctgaat caggatattc  
8521 ttctaatacc tggaatgctg ttttccggg gatcgcagtg gtgagtaacc atgcatcac  
8581 aggagtacgg ataaaatgct tgatggtcgg aagaggcata aattccgta gccagtttag  
8641 tctgaccatc tcatctgtaa catcattggc aacgctacct ttgccatgtt tcagaaacaa  
8701 cctcggcgca tcgggcttcc catacaagcg atagattgct gcacctgatt gcccagacatt  
8761 atcgegagcc catttatacc catataaac agcatccatg ttggaattta atcgeggcct  
8821 cgacgtttcc cgttgaatat ggctcataac accccttcta ttactgttta tgaagcaga  
8881 cagttttatt gttcatgatg atatatttt atcttgtgca atgtaacatc agagattttg  
8941 agacacgggc cagagc

//

**5. piggyBac plasmid containing *Cas9* under control of the *Exuperentia* promoter, used to obtain the m-linked m-albR9 *Ae. albopictus* line**

LOCUS pBExuCas9 13831 bp ds-DNA circular SYN 23-OCT-2017  
DEFINITION synthetic circular DNA  
SOURCE synthetic DNA construct  
FEATURES Location/Qualifiers  
source 1..13831  
/organism="recombinant plasmid"  
/mol\_type="other DNA"  
rep\_origin complement(63..651)  
/direction=LEFT  
/label=ori  
/note="high-copy-number ColE1/pMB1/pBR322/pUC origin of replication"  
CDS complement(798..1607)  
/codon\_start=1  
/gene="aph(3')-Ia"  
/product="aminoglycoside phosphotransferase"  
/label=KanR  
/note="confers resistance to kanamycin in bacteria or G418 (Geneticin(R)) in eukaryotes"  
/translation="MSHIQRETSRPLNSNMDADLYGYKWARDNVGQSGATIYRLYGKP  
DAPELFLKHGKGSVANDVTDEMVRNLNWLTEFMPLPTIKHFIRTPDDAWLLTTAIPGKTA  
FQVLEEYPDSGENIVDALAVFLRRLHSIPVCNCPFNSDRVFRLAQAQSRMNNGLVDASD  
FDDERNGWPVEQVWKEMHKLLPFSPDSVVTHGDFSLDNLIFDEGKLGICIDVGRVGIAD  
RYQDLAILWNCLGEFSPSLQKRLFQKYGIDNPD MNKLQFHLMLDEFF"  
primer\_bind 1720..1736  
/label=M13 rev  
/note="common sequencing primer, one of multiple similar variants"  
misc\_feature 1722..1740  
/label=M13R  
/note="M13R"  
misc\_feature complement(1777..1912)  
/label=PiggyBac 5'TR  
/note="PiggyBac 5'TR"  
misc\_feature 1793..1811  
/label=TR2  
/note="TR2"  
/label=Rv2 - PiggyBac NO attP NO lox  
misc\_feature complement(2087..2307)  
/label=attP'  
/note="attP"  
protein\_bind 2143..2242  
/label=phage phi-C31 attP  
/bound\_moietiy="phage phi-C31 integrase"  
/note="attachment site of phage phi-C31"  
protein\_bind 2318..2351  
/label=loxP  
/bound\_moietiy="Cre recombinase"

```

        /note="Cre-mediated recombination occurs in the 8-bp core
        sequence (GCATACAT)."
misc_feature 2354..2356
        /label=lac promoter
        /note="lac promoter"
misc_feature 2357..3135
        /label=ExupPromoter
CDS        3137..3205
        /codon_start=1
        /label=3xFLAG
        /note="3xFLAG"
        /translation="MDYKDHDGDYKDHDIDYKDDDDK"
CDS        3206..3256
        /codon_start=1
        /label=NLS
        /note="NLS"
        /translation="MAPKKRKRKVGIHGVPAA"
CDS        3257..7357
        /codon_start=2
        /product="Cas9 endonuclease from the Streptococcus pyogenes
        Type II CRISPR/Cas system, mutated to improve targeting
        specificity (Slaymaker et al., 2016)"
        /label=eSpCas9(1.1)
        /note="carries the mutations K848A, K1003A, and R1060A"
misc_feature complement(3486..3519)
        /label=EM686
        /note="EM686"
CDS        7358..7405
        /codon_start=1
        /product="bipartite nuclear localization signal from
        nucleoplasmin"
        /label=nucleoplasmin NLS
        /translation="KRPAATKKAGQAKKKK"
misc_feature 7397..7637
        /label=MCS
        /note="pBluescript multiple cloning site"
misc_feature 7397..7405
        /label=NLS
        /note="NLS"
misc_feature 7415..7637
        /label=SV40 term
        /note="SV40 term"
3'UTR      join(8245..8423,9028..9037)
intron     8424..9027
        /label=3'UTRintron
CDS        9042..9722
        /codon_start=1
        /product="wild-type DsRed"
        /label=DsRed1
        /note="mammalian codon-optimized"
        /translation="MVRSSKNVIKEFMRFKVRMEGTVNGHEFEIEGEGEGRPYEGHNTV

```

KLKVTKGGPLPFAWDILSPQFQYGSKVYVKHPADIPDYKKLSFPEGFKWERVMNFEDGG  
VVTVTQDSSLQDGCFIYKVKFIGVNFPSDGPVMQKKTMGWEASTERLYPRDGVKGEIH  
KALKLKDGGHYLVEFKSIYMAKKPVQLPGYYYVDSKLDITSHNEDYTIVEQYERTEGRH  
HLFL"

misc\_feature 9724..9960  
/label=SV40 Term  
/note="SV40 Term"  
primer\_bind complement(9765..9784)  
/label=GATC-pEGFP\_C2-RP  
polyA\_signal 9843..9961  
/label=SV40 poly(A) signal  
/note="SV40 polyadenylation signal"  
protein\_bind 9979..10012  
/label=loxP  
/bound\_moiety="Cre recombinase"  
/note="Cre-mediated recombination occurs in the 8-bp core  
sequence (GCATACAT)."  
primer\_bind 10012..10041  
/label=Fw2 - PiggyBac NO attP NO lox EM834  
misc\_feature complement(10105..10262)  
/label=original PiggyBac 3'region  
misc\_feature complement(10200..10218)  
/label=TR2  
/note="TR2"  
misc\_feature 10214..10234  
/label=direct repeat  
misc\_feature complement(10250..10262)  
/label=TR1  
/note="TR1"  
primer\_bind complement(10392..10408)  
/label=M13 fwd  
/note="common sequencing primer, one of multiple similar  
variants"  
misc\_feature 10681..10878  
/label=hs promoter  
/note="hs promoter"  
misc\_feature 10879..11267  
/label=hs promoter  
/note="hs promoter"  
/label=rrnB terminator, EM33  
/note="rrnB terminator, EM33"  
terminator 11268..11313  
/label=rrnB T1 terminator  
/note="transcription terminator T1 from the E. coli rrnB  
gene"  
CDS 11397..13181  
/codon\_start=1  
/label=transposase  
/note="transposase"  
/translation="MGCSLDDEHILSALLQSDDELVGEDSDSEISDHVSEDDVQSDTEE  
AFIDEVHEVQPTSSGSEILDEQNIEQPGSSLASNRILTLPQRTIRGKNKHCWSTSKST

RRSRVSALNIVRSQRGPTRMCRNIYDPLLCKFLFFTDEIISEIVKWTNAEISLKRRESM  
TGATFRDNEDEIYAFFGILVMTAVRKDNHMSTDDLDFDRSLSMVYVSMSRDRDFDLIR  
CLRMDDKSIRPTLRENDVFTVPRKIWDLFIHQCIQNYTPGAHLTIDEQLLGFRGRCPFR  
MYIPNKPSKYGIKILMMCDGSKYMINGMPYLGRGTQNGVPLGEYYVKELSKPVHGSC  
RNITCDNWFTSIPLAKNLLQEPYKLTIVGTVRSNKREIPEVLKNSRSRPVGTSMFCFDG  
PLTLVSYKPKPAKMVYLLSSCDEDASINESTGKPQMVMYYNQTKGGVDTLDMCSVMTC  
SRKTNRWPMALLYGMINIACINSFIIYSHNVSSKGEKVQSRKKFMRNLYMSLTSSFMRK  
RLEAPTLKRYLRDNISNILPNEVPGTSDDSTEPEVMKKRTYCTYCPKIRRKANASCKK  
CKKVICREHNIDMCQSCF"

terminator 13537..13564

/label=rrnB T2 terminator

/note="transcription terminator T2 from the E. coli rrnB  
gene"

## ORIGIN

1 aacatgtgag caaaaggcca gcaaaaggcc aggaaccgta aaaaggccgc gttgctggcg  
61 ttttcata ggctccgcc cctgacgag catcaaaaa atcgacgctc aagtcagagg  
121 tggcgaaacc cgacaggact ataaagatac caggcgttc ccctggaag ctccctcgtg  
181 cgctctcctg ttccgacct gccgcttacc ggatacctgt cgcctttct ccctcgga  
241 agcgtggcgc ttctcatag ctcacgctgt aggtatctca gttcgggtga ggtcgttcgc  
301 tccaagctgg gctgtgtgca cgaaccccc gttcagccc accgctgcgc ctatccggt  
361 aactatcgtc ttgagtcca cccgtaaga cagcactat cgcactggc agcagccact  
421 ggtaacagga ttgacagagc gaggtatgta ggcggtgcta cagagttctt gaagtgggtg  
481 cctaactacg gctacactag aagaacagta ttggtatct gcgctctgct gaagccagtt  
541 acctcggaa aaagagtgg tagctctga tccggcaaac aaaccaccgc tggtagcggg  
601 ggttttttg tttgcaagca gcagattacg cgcagaaaaa aaggatctca agaagatcct  
661 ttgatcttt ctacggggtc tgacgctcag tggaacgacg cgtaactcac gtaagggat  
721 ttggtcag agcttgcgc gtcccgtaa gtcagcgtaa tgctctgcca gtgtacaac  
781 caattaacca attctgatta gaaaaactca tcgagcatca aatgaaactg caatttattc  
841 atatcaggat tatcaatacc atattttga aaaagccgtt tctgtaatga aggagaaaa  
901 tcaccgagge agttccatag gatggcaaga tcttggatc ggtctgcgat tccgactcgt  
961 ccaacatcaa tacaacctat taattcccc tegtcaaaaa taaggttatc aagtgagaaa  
1021 tcacatgag tgacgactga atccggtag aatggcaaaa gtttatgcat tctttccag  
1081 actgttcaa caggccagcc attacgctc tcatcaaat cactcgcac aaccaaacg  
1141 ttattcattc gtgattgccc ctgagcgaga cgaaatcgc gatcgtggtt aaaaggacia  
1201 ttacaacag gaatcgaatg caaccggcgc agaacactg ccagcgcac aacaatatt  
1261 tcacctgaat caggatattc ttctaatacc tggatgctg ttttccggg gatcgcagt  
1321 gtgagtaacc atgcatcacc aggagtacgg ataaaatgct tgatggtcgg aagaggcata  
1381 aattcctca gccagtttag tctgaccatc tcatctgtaa catcattggc aacgctacct  
1441 ttgcatggt tcagaaaca ctctggcgca tggggttcc catacaagcg atagattgc  
1501 gcacctgatt gcccgacatt atcgcgagcc catttatacc catataaac agcatccatg  
1561 ttggaattta atcgcgctc cgacgttcc cgttgaatat ggctcataac acccctgta  
1621 ttactgttta tgtaagcaga cagttttatt gttcatgatg atataattt atctgtgca  
1681 atgtaacatc agagattttg agacacgggc cagagctgc aggaacacgc tatgaccatg  
1741 taatacgacg atatgatcct gatgcagcta gattaacct agaaagatag tctgcgtaaa  
1801 atgacgcat gcattctga aatattgctc tctcttcta aatagcgcga atccgctcgt  
1861 gtgcatttag gacatctcag tcgccgctg gagctcccgt gagcgtgct gtcaatgag  
1921 gtaagtgtca ctgatttga actataacga ccgctgagt caaatgacg catgattatc  
1981 ttttactgta ctttaagat taaactcata cgataattat attgtattt catgttctac  
2041 ttactgata acttattata tatatattt ctgttatag attagatcgc gctcgcgca  
2101 ctgacgctc taagcaccg cgtacgctc caccggctc acaaccctt gtgcatgct  
2161 ggcgacccta cgccccaac tgagagaact caaagggtac cccagttggg gcactactc

2221 cgaaaaccgc ttctgacctg ggaaaacgtg aagccccggg gcatccgctg aggggtgccg  
2281 ccggggcttc ggtgtgtccg tcagtactgc aggtaccata acttcgtata gcatacatta  
2341 tacgaagtta taccggatcc aatatagata ttttgatgct tgaggcgaaa aaaaaggctc  
2401 gcaagtgtat ttttggaaaa ttaaggtgg aaaacattgg atgacacttt tccgtgcatt  
2461 gaaatcaata cataaaaaata aattacctgg catcctctgc cggtagtggg gagtgcacaa  
2521 tgtgatggca ttggtgacat tgggtgagtc atgcatgatt aaaaaatata aacggtcgac  
2581 attttcgca tttctgcca caaattccat tggcatctca aatattacaa taattccgca  
2641 tcgagtataa attttcaact ccatcaatgg tcacatttaa actaatatfc gaattttcc  
2701 gccgatatt ccacaaaacc cggcacgtaa tcaactataa tctattctag taccgcaccg  
2761 acactaacga aattttgctc ccgtttcgtc cgacttatt ttgctctaga ccagatcgac  
2821 cttgccaacc tteacttcaa gttcatcaag ccaaggacga gcatcgccgc gttggaagaa  
2881 aaaaaaggaa agtttcagaa aagtgttctg tggaaatatt atcctcaaaa gtgaaaatct  
2941 aaaacacaaa cgggtcgcta aaagcgtcgc tgaaaacatt gataaaaacc tgtgtgaaaa  
3001 ttgcaaat tttcgaaga gtattgtaa gtgtcttct ttttccacc atgtgacat  
3061 ttttagaat tttctttt ggaggaaaag ctggttgcgt ggataaaaga ggttatctt  
3121 tgtctacaga gtgaaaatgg actataagga ccacgacgga gactacaagg atcatgatat  
3181 tgattacaaa gacgatgacg ataagatggc cccaaagaag aagcgggaagg tcggtatcca  
3241 cggagtccca gcagccgaca agaagtacag catcggcctg gacatcggca ccaactctgt  
3301 gggctgggcc gtgatcacc acgagtacaa ggtgcccgag aagaattca aggtgctggg  
3361 caacaccgac cggcacgaca tcaagaagaa cctgatcgga gccctgctgt tcgacagcgg  
3421 cgaacagacc gaggccacc ggctgaagag aaccgccaga agaagataca ccagacggaa  
3481 gaaccggatc tgctatctgc aagagatctt cagcaacgag atggccaagg tggacgacag  
3541 cttctccac agactggaag agtcttctt ggtggaagag gataagaagc acgagcggca  
3601 ccccatcttc ggcaacatcg tggacgaggt ggctaccac gagaagtacc ccacatcta  
3661 ccactgaga aagaactgg tggacagcac cgacaaggcc gacctgcggc tgatctatct  
3721 ggccctggcc cacatgatca agtccgggg ccacttctg atcgagggcg acctgaacc  
3781 cgacaacagc gacgtggaca agctgttcat ccagctggg cagacctaca accagctgtt  
3841 cgaggaaaac cccatcaacg ccagcggcgt ggacgccaag gccatctgt ctgccagact  
3901 gagcaagagc agacggctgg aaaatctgat cgcccagctg cccggcgaga agaagaatgg  
3961 cctgttcgga aacctgattg cctgagcct gggcctgacc cccaactca agagcaact  
4021 cgacctggcc gaggatgcca aactgcagct gagcaaggac acctacgacg acgacctgga  
4081 caacctgctg gccagatcg gcgaccagta cgccgacctg tttctggccg ccaagaacct  
4141 gtccgacgcc atctgtctga gcgacatct gagagtgaac accgagatca ccaaggcccc  
4201 cctgagcgc tctatgatca agagatacga cgagcaccac caggacctga cctgtctgaa  
4261 agctctcgtg cggcagcagc tgcctgagaa gtacaaagag attttctcg accagagcaa  
4321 gaacggctac gccggctaca ttgacggcgg agccagccag gaagagtctt acaagttcat  
4381 caagcccatc ctgaaaaga tggacggcac cgaggaactg ctctggaagc tgaacagaga  
4441 ggacctgctg cggaagcagc ggaccttca caacggcagc atccccacc agatccacct  
4501 gggagagctg cacgccatc tgcggcggca ggaagattt taccattec tgaaggacia  
4561 ccgggaaaag atcgagaaga tctgacctt ccgcatcccc tactactggt gccctctggc  
4621 caggggaaac agcagatcg cctggatgac cagaaagagc gaggaaacca tcaccctctg  
4681 gaacttcgag gaagtgtgg acaaggcgc ttcgcccag agcttcatcg agcggatgac  
4741 caacttcgat aagaacctgc ccaacgagaa ggtgctgccc aagcacagcc tctgtacga  
4801 gtacttacc gtgtataacg agctgaccaa agtgaatac gtgaccgagg gaatgagaaa  
4861 cccgccttc ctgagcggcg agcagaaaaa ggccatcgtg gacctgctgt tcaagaccaa  
4921 ccggaaagt accgtgaagc agctgaaaga ggactactc aagaaaatc agtgcttca  
4981 ctccgtgaa atctccggcg tgaagatcg gttcaacgcc tccctgggca cataccagca  
5041 tctgtgaaa attatcaagg acaaggactt cctggacaat gaggaaaacg aggacattct  
5101 ggaagatata gtctgaccc tgacactgtt tgaggacaga gagatgatcg aggaacggct  
5161 gaaaacctat gccacctgt tcgacgacaa agtgatgaag cagctgaagc ggccgagata  
5221 caccggctgg ggcaggctga gccggaagct gatcaacggc atccgggaca agcagtccgg

5281 caagacaatc ctggattfcc tgaagtccga cggcttcgcc aacagaaact tcatgcagct  
5341 gatccacgac gacagcctga cctftaaaga ggacatccag aaagcccagg tgtccggcca  
5401 gggcgatagc ctgcacgagc acattgccaa tctggccggc agccccgcca ttaagaaggg  
5461 catcctgcag acagtgaagg tgggtggacga gctcgtgaaa gtgatgggcc ggcacaagcc  
5521 cgagaacatc gtgatcgaaa tggccagaga gaaccagacc acccagaagg gacagaagaa  
5581 cagcccgag agaatgaagc ggatcgaaga gggcatcaaa gagctgggca gccagatcct  
5641 gaaagaacac cccgtggaac acaccagct gcagaacgag aagctgtacc tgtactacct  
5701 gcagaatggg cgggatatgt acgtggacca ggaactggac atcaaccggc tgtccgacta  
5761 cgatgtggac catatcgtgc ctacagactt tctggccgac gactccatcg acaacaaggt  
5821 gctgaccaga agcgacaaga accggggcaa gagcgacaac gtgcctccg aagaggtcgt  
5881 gaagaagatg aagaactact ggcggcagct gctgaacgcc aagctgatta cccagagaaa  
5941 gttegacaat ctgaccaagg ccgagagagg cggcctgagc gaactggata aggccggctt  
6001 catcaagaga cagctggtgg aaaccggca gatcacaag cacgtggcac agatcctgga  
6061 ctcccggatg aactaagt acgacgagaa tgacaagctg atccgggaag tgaagtgat  
6121 caccctgaag tcaagctgg tgtccgattt ccggaaggat ttccagtttt acaaagtgcg  
6181 cgagatcaac aactaccacc acgcccacga cgcctacctg aacgccctcg tgggaaccgc  
6241 cctgatcaaa aagtacctg cgtggaag cgagttcgtg tacggcgact acaaggtgta  
6301 cgactgccc aagatgatc ccaagagcga gcaggaaatc ggcaaggcta ccgccaagta  
6361 cttctctac agcaacatca tgaactttt caagaccgag attacctgg ccaacggcga  
6421 gatccggaag gcgccttga tcgagacaaa cggcgaaacc ggggagatcg tgtgggataa  
6481 gggccgggat tttgccaccg tgcggaaagt gctgagcatg cccaagtga atactgtgaa  
6541 aaagaccgag gtgcagacag gcgcttcag caaagagtct atcctgccc agaggaacag  
6601 cgataagctg atgccagaa agaaggactg ggaccctaag aagtacggcg gcttcgacag  
6661 cccaccctg gcctattctg tgctggtggt ggccaaagt gaaaagggca agtccaagaa  
6721 actgaagagt gtgaaagagc tgctggggat caccatcatg gaaagaagca gcttcgagaa  
6781 gaatccatc gactttctg aagccaaggg ctacaaagaa gtgaaaaagg acctgatcat  
6841 caagctgct aagtactccc tttcagact ggaaaacggc cggaaagaaa tgctggcctc  
6901 tgccggcga ctgcagaagg gaaacgaact ggcctgccc tccaaatag tgaacttct  
6961 gtacctggc agccactatg agaagctgaa gggtcccc gaggataatg agcagaaaca  
7021 gctgtttgtg gaacagcaca agcactacct ggacgagatc atcgagcaga tcagcgagtt  
7081 ctccaagaga gtgatcctgg ccgacgctaa tctggacaaa gtgctgtccg cctacaaca  
7141 gcaccgggat aagccatca gagagcaggc cgagaatate atccacctgt ttacctgac  
7201 caatctggga gccctgccc cttcaagta ctttgacacc accatcgacc ggaagaggtg  
7261 caccagcacc aaagaggtgc tggacgccac cctgatccac cagagcatca ccggcctgta  
7321 cgagacacgg atcgactgt ctacgtggg aggcgacaaa aggcggcgg ccacgaaaa  
7381 ggcggccag gcaaaaaaga aaaagtaaga attctagaca taatcagca taccacattt  
7441 gtgaggttt tacttgctt aaaaaacctc ccacacctcc cctgaacct gaaacataaa  
7501 atgaatgcaa ttgtgtgt taactgttt attgcagctt ataattggtg caataaagc  
7561 aatagcatca caaattcac aaataaagca tttttctca ctgcattcta gttgtggtt  
7621 gtccaaactc atcaatgtat ctaggatgtg cgatccatct ttacatgtag cttgtgcatt  
7681 gaatccaatt ataatttgc ttggcaccag ctgagccaga caagaaagaa agcttcccag  
7741 aagtatatcg atttagaagg gttgacgtca ctttctgac tgcactaata cagcaaatga  
7801 tacaattaga atgattcaag tgaattccc aaattactgc tttgtctctg gatttggtg  
7861 tcagattaca ttcgaagcta agaatagcta ccgaaattgt cgatcaaatc aggaaatcct  
7921 ttctctatc aaaaaggcat tcgcacatct ttctctgtat gccatataca cgaatggtg  
7981 gtacattgac gcttttcca gaagttgaac tgcacgttc aaggtacaga atgaacgact  
8041 aacagacaca agcagctttt gctgtccatt cagacacagg gatggtacce atagtcgac  
8101 gatttagagc catccaaccg aacagaggta tatgtatgaa tggattgacg aaattttta  
8161 gaagtacaac caccactag gcagtgctta taaaacgccc ctgcaaaggc aaaaccagct  
8221 caatgaata cgtttcctag tggagtgaac attacgggt ccaagtaagc agtgccagtg  
8281 caagtgaagt gaagtctta gtgaaaaaga gtgatccaat tagccagagg agaaaattc

8341 agagtgaaca aagctttgft caaaggacaa ttactattaa atttgtgaaa gtcatttcg  
8401 gtgaagggaa tcttctagt aaggtaggta aattaaatga tgaattata gctatgagcg  
8461 aaaactagtt tggatgaatga ttctttgtc tttgaatgag caaactatit tccaagatgg  
8521 cgactattga gctttgagtg attagtgaat attgcaacg cagtttcac atcattgata  
8581 aaaccaatg gtcattcagc gcgataatca tatttcgttg aatcatcgct gctaattgaa  
8641 ttaaattct agagcaagcg cgaattcgcc atatttctaa aattaaat atgtggtgata  
8701 attaccatt aaggaat ataacacat cgagaaaaac cttgaggaaa tcgtgaaaac  
8761 tgaagatac gcaattcca aactacgtag tcaaaagtcg aaaacaagt aattttcac  
8821 taaaaagtag ggcgtgttg tgacgtc acctcaagt gtatatttt cacttgccct  
8881 gcgactgcaa acgcagacaa agcaaaacaa gtttaaac tgctgtgctg tgctcgaagc  
8941 caaaggcaat gaataat caaatgagag tttgatttc acaaccaat actgaagcgt  
9001 ttctctgtt cttttctgc tcaacagaga ttcaacaat gatggtgctg tctccaaga  
9061 acgtcatcaa ggagttcatg cgcttcaagg tgcgcatgga gggcaccgtg aacggccacg  
9121 agttcgagat cgaaggcgag ggcgagggcc gccctacga gggccacaac accgtgaagc  
9181 tgaagtgac caaggcgcg cccctgccct tcgctggga catcctgtcc cccagttcc  
9241 agtacggctc caaggtgtac gtgaagcacc ccgcccacat ccccactac aagaagctgt  
9301 cttccccga gggctcaag tgggagcgcg tgatgaact cgaggacggc ggcgtggtga  
9361 ccgtgacca ggactctcc ctgcaggacg gctgctcat ctacaagggt aagttcatc  
9421 gctgaact cccctcgcac ggccccgtaa tgcagaagaa gaccatgggc tgggagcct  
9481 ccaccgagc cctgtaccc cgcgacggcg tgctgaaggc cgagatccac aaggccctga  
9541 agctgaagga cggcgccac tactggtgg agttcaagtc catctacatg gccaagaagc  
9601 ccgtgcagct gcccgctac tactacgtgg actccaagct ggacatcacc tcccacaacg  
9661 aggactacac catcgtggag cagtacgagc gcaccgaggc ccgccaccac ctgttctgt  
9721 agcgccgcg actctagatc ataactagcc ataccacat ttagaggtt ttactgtt  
9781 taaaaaacct cccacacct cccctgaacc tgaacataa aatgaatgca attgtgttg  
9841 ttaactgtt tattgcagct tataatggtt acaataaag caatagc acaaattca  
9901 caataaagc atttttca ctgcattcta gttgtgtt gtccaaact atcaatgat  
9961 cgctgtaat tcgtcagat aactcgtat agcatacatt atacgaagt atgagctcaa  
10021 ttcgataaaa gttttgtac ttatagaag aaattttgag tttttgtt ttttaataa  
10081 taaataaaca taaataaatt gttgttgaa ttattatta gtatgtaagt gtaataata  
10141 taaactta tatctatca aattaataa taaacctcga tatacagacc gataaaacac  
10201 atcgctcaat ttacgcatg attatctta acgtacgtca caaatgatt atctttctag  
10261 ggttaatcta gctgctgtt ctgcagcgtg tcgagcatc tcatctgctc catcacgctg  
10321 taaacacat tgcaccgcg agtctgccc tctccacgg gttcaaaaac gtgaatgac  
10381 gagcgcgct cactggcctg cgtttfaca cgtcgtgact gggaaaacc tggcgttacc  
10441 caactaat gccttgacg acatccccct ttcgccagct ggcgtaatag cgaagaggcc  
10501 cgcaccgate gccctccca acagttgcgc agcctgaatg gcgaatggga cgcgcctgt  
10561 agcggcgcat taagcggcg ggggtgtgtg gttacgcgca gcgtgaccgc tacactgcc  
10621 agcgcctag cgcgcctcc ttctgttctc ttccctctc ttctgccac gttcgccgat  
10681 cagataagtt caatgatc cagtgcagta aaaaaaaaaa tgtttttt atctacttc  
10741 cgcaaaaat ggtttatta acttacata atactagaat tgatccccga tccccatga  
10801 atcccaaac aaactggtta ttgtgtagg tcattgttt ggcagaaaga aaactcgaga  
10861 aatttctctg gccgtattc gtattctct cttttctt ttagtctct cctctctga  
10921 ctaatgctc ctactctc cacacagta acggcact gctctggtg gttcgagaga  
10981 gcgcgctcg aatgttcgcg aaaagagcgc cggagtata atagaggcgc tctgtctacg  
11041 gagegacaat tcaattcaa caagcaagt gaacacgtc ctaagcga gtaagcaaa  
11101 taaacaagc cagctgaaca agctaaaca tctgcagta agtgcaagt aaagtgaatc  
11161 aattaaagt aaccagcaac caagtaaat aactgcaact actgaaatc gccaagaagt  
11221 aattattgaa tacaagaaga gaactctgaa tagggaattg ggaattcaa ataaaacgaa  
11281 aggctcagtc gaaagactgg gcctttggt ttatctgtct agaaggccta attccagctg  
11341 agcgcggctg gctaccata ccagttggtc tgggtcggg gatcctatat aataaatg



11401 gatgttcttt agacgatgag catatcctct ctgctcttct gcaaagcgat gacgagcttg  
11461 ttggtgagga ttctgacagt gaaatcag atcacgtaag tgaagatgac gtccagagcg  
11521 atacagaaga agcgtttata gatgaggtag atgaagtga gccaacgtca agcggtagtg  
11581 aaatattaga cgaacaaaat gttattgaac aaccagggtc ttattggct ttaaacagaa  
11641 tcttgacctt gccacagagg actattagag gtaagaataa acattgttg tcaactca  
11701 agtccacgag gcgtagccga gtctctgcac tgaacattgt cagatctcaa agaggccga  
11761 cgcgtatgtg ccgcaatata tatgaccac tttatgctt caaactattt ttactgatg  
11821 agataattc ggaattgta aatggacaa atgctgagat atcattgaaa cgtcgggaat  
11881 ctatgacagg tgctacattt cgtgacacga atgaagatga aatctatgct ttcttggta  
11941 ttctggtaat gacagcagtg agaaaagata accacatgac cacagatgac ctcttgatc  
12001 gatcttctc aatgggtgac gtctctgtaa tgagtcgta tcttttgat ttttgatac  
12061 gatgtcttag aatggatgac aaaagtatac ggcccacact tcgagaaaac gatgtattta  
12121 ctctgttag aaaaatattg gatctcttta tccatcagtg catacaaaa tacactccag  
12181 gggctcatt gaccatagat gaacagttac ttggttttag aggacgggtg ccgttagga  
12241 tgtatatccc aaacaagcca agtaagtatg gaataaaaat cctcatgatg tgtgacagtg  
12301 gtacgaagta tatgataaat ggaatgcctt atttgggaag aggaacacag accaacggag  
12361 taccactcgg tgaatactac gtgaaggagt tatcaaagcc tctgacaggt agttgtcga  
12421 atattcgtg tgacaattgg ttcactcaa tcccttagc aaaaaacta ctacaagaac  
12481 cgtataagtt aaccattgtg ggaaccgtc gatcaaaaa acgagagata ccggaagtac  
12541 tgaaaaacag tcgctccagg ccagtgggaa catcgatgtt ttgtttgac ggaccctta  
12601 ctctcgtc atataaacg aagccagcta agatggata cttattatca tcttggatg  
12661 aggatgctc tatcaacgaa agtaccggta aaccgcaat ggttatgtat tataatcaaa  
12721 ctaaaggcgg agtgacacg ctgacaaaa tgtgtctgt gatgacctg agtaggaaga  
12781 cgaataggg cctatggca ttattgtacg gaatgataa cattgcctg ataaattct  
12841 ttattatata cagcataat gtcagtacg agggagaaaa ggtcaaat cgcaaaaat  
12901 ttatgaaaa ctttaccatg agcctgacgt catcgttat gcgtaagcgt ttagaagtc  
12961 ctacttgaa gagatattg cgcgataata tctctaata tttgcaaat gaagtcctg  
13021 gtacatcaga tgacagtact gaagagccag taatgaaaa acgtacttac tctactact  
13081 gccctctaa aataaggcga aaggcaatg catcgtgcaa aaaaatgcaa aagttattt  
13141 gtcgagagca taatattgat atgtgcaaaa gttgttctg actgactaat aagtataatt  
13201 tgttctatt atgtataagt taaactaatt acttattta taatacaaca tgactgttt  
13261 taaagtacaa aataagtta ttttgtaaa ggagagaatg ttaaaaagt ttgtacttt  
13321 atagaagaaa tttgagttt ttgtttttt ttaataaata aataaacata aattgtttg  
13381 tgaattgga tccgtagagg ctttctgtt gttgtcggg gaacgctc ctgagtagga  
13441 caaatccgc gggagcggat ttgaacgtg tgaagcaac gcccgaggg tggcgggag  
13501 gacgcccgc ataaactgcc aggcatacaa ctaagcagaa ggccatcctg acggatggc  
13561 ttttgcgtt tctacaaact cttctggct agcggtagc gtattaattg cgttgcgctc  
13621 actgcccgt tccagtcgg gaaacctgc gtgccagctg cattaatgaa tcggccaacg  
13681 cgcggggaga ggcggttgc gtattgggcg ctttccgct tctcgtca ctgactcgt  
13741 gcgctcggc gttcggctc ggcgagcgg atcagctcac tcaaaggcg taatacgggt  
13801 atccacagaa tcaggggata acgagga g

//

**6. pENTR<sub>PUB</sub>-OptpB Transposase helper plasmid expressing a hyper-active, codon-optimized and NLS-modified piggyBac transposase under the control of the *Ae. aegypti* Polyubiquitin promoter**

LOCUS Exported 6013 bp ds-DNA circular SYN 28-MAY-2019

DEFINITION synthetic circular DNA

ACCESSION .

VERSION .

KEYWORDS .

SOURCE synthetic DNA construct

ORGANISM synthetic DNA construct

REFERENCE 1 (bases 1 to 6013)

AUTHORS .

TITLE Direct Submission

JOURNAL Exported Wednesday, Feb 3, 2021 from SnapGene 5.2.4

<https://www.snapgene.com>

FEATURES Location/Qualifiers

promoter 38..1418

/label=Aedes aegypti PUb promoter

3'UTR join(626..804,1409..1418)

intron 805..1408

/label=3'UTRintron

CDS 1420..3252

/codon\_start=1

/label=codon optimized

/note="codon optimized"

/translation="MAPKKKRKVGIHGVPAAAGSSLDDEHILSALLQSDDELVGEDSDS

EISDHVSEDDVQSDTEEFIDEVHEVQPTSSGSEILDEQNVIEQPGSSLASNRILTLP

QRTIRGKNKHCWSTSKSTRRSRVSALNIVRSQRGPTRMCRNIYDPLLCFKLFFTDEII

SEIVKWTNAEISLKRRESMTGATFRDNEDEIYAFFGILVMTAVRKNHNMSTDDLDFDR

SLSMVYVSVMSRDRDFDLIRCLRMDDKSIRPTLRENDVFTVPRKIWDLFIHQCIQNYT

PGAHLTIDEQLLGFRGRCPFRMYIPNKPSKYGIKILMMCDSGTKYMINGMPYLGRGTQ

TNGVPLGEYYVKELSKPVHGSCRNITCDNWFTSIPLAKNLLQEPYKLTIVGTVRSNKR

EIPEVLKNSRSRPGTSMFCFDGPLTLVSYKPKPAKMVYLLSSCEDASINESTGKPKQ

MVMYYNQTKGGVDTLDQMCSVMTCRKTNRWPMALLYGMINIACINSFIIYSHNVSSK

GEKVQSRKKFMRNLYMSLTSSFMRKRLEAPTLKRYLRDNISNILPNEVPGTSDDSTEE

PVMKKRKYCTYCPKIRRKANASCKKCKKVICREHNIDMCQSCF"

misc\_feature 1420..1470

/label=NLS

/note="NLS"

misc\_feature 1471..3252

/label=piggyBac transposase ORF

/note=""

misc\_feature 3253..3485

/label=SV40 terminator

/note="SV40"

misc\_feature complement(3268..3291)

/label=EM226

/note="EM226"

misc\_feature 3269..3290

/label=AG105

/note="AG105"

misc\_feature complement(3458..3485)  
     /label=EM503  
     /note="EM503"  
 misc\_feature 3463..3485  
     /label=EM172  
     /note="EM172"  
 misc\_feature complement(3507..3510)  
     /label=EM157  
     /note="EM157"  
 promoter complement(3515..3533)  
     /label=T7 promoter  
     /note="promoter for bacteriophage T7 RNA polymerase"  
 primer\_bind complement(3538..3554)  
     /label=M13 rev  
     /note="common sequencing primer, one of multiple similar variants"  
 misc\_feature complement(3578..3596)  
     /label=pDONR-RP  
     /note="pDONR-RP"  
 CDS 3667..4476  
     /codon\_start=1  
     /gene="aph(3')-Ia"  
     /product="aminoglycoside phosphotransferase"  
     /label=KanR  
     /note="confers resistance to kanamycin in bacteria or G418 (Geneticin(R)) in eukaryotes"  
     /translation="MSHIQRETSRPLNSNMDADLYGYKWARDNVGQSGATIYRLYGK  
     PDAPFLFKHGKGSVANDVTDEMVRNLNWLTEFMPLPTIKHFIRTPDDAWLLTTAIPGK  
     TAFQVLEEYPDSGENIVDALAVFLRRLHSIPVCNCPFNSDRVFRLAQAQSRMNNGLVD  
     ASDFDDERNGWPVEQVWKEMHKLLPFSPDSVVTHTGDFSLDNLIFDEGKLGICIDVGRV  
     GIADRYQDLAILWNCLGEFSPSLQKRLFQKYGIDNPDMNKLQFHLMLDEFF"  
 rep\_origin 4623..5211  
     /direction=RIGHT  
     /label=ori  
     /note="high-copy-number ColE1/pMB1/pBR322/pUC origin of replication"  
 terminator 5541..5568  
     /label=rrnB T2 terminator  
     /note="transcription terminator T2 from the E. coli rrnB gene"  
 terminator 5660..5746  
     /gene="Escherichia coli rrnB"  
     /label=rrnB T1 terminator  
     /note="transcription terminator T1 from the E. coli rrnB gene"  
 primer\_bind complement(5680..5701)  
     /label=EM841  
 primer\_bind 5810..5826  
     /label=M13 fwd  
     /note="common sequencing primer, one of multiple similar variants"

misc\_feature 5810..5825  
/label=M13F  
/note="M13F"  
protein\_bind complement(5876..6000)  
/gene="mutant version of attR"  
/label=attR4  
/bound\_moiety="LR Clonase(TM)"  
/note="recombination site for the Gateway(R) LR reaction"  
source 1..6013  
/dnas\_title="Exported"

#### ORIGIN

1 gctagcgtcg acggtatcga taagcttgat cggatccatc ttacatgta gcttgtgcat  
61 tgaatccaat tataatttgc cttggcacca gctgagccag acaagaaaga aagcttccca  
121 gaagtataatc gatttagaag ggttgacgtc actttgctga ctgcactaat acagcaaag  
181 atacaattag aatgattcaa gtgaaattcc caaattactg ctttgtctct ggatttggtt  
241 atcagattac attcgaagct aagaatagct accgaaattg tcgatcaaat caggaatcc  
301 ttctctatc gaaaaggca ttcgcacatc ttctctgta tgccatatac acgaatggt  
361 ggtacattga cgtcttggc agaagtgaa ctgcatcgtt caaggtacag aatgaacgac  
421 taacagacac aagcacgttt tgctgtccat tcagacacag ggatggtacc catagtcat  
481 cgatttagag ccatccaacc gaacagaggt atatgtatga atggattgca gaaatttct  
541 agaagtacaa ccaccactac ggcagtgtct ataaaacgcc cctgcaaagg caaaaccagc  
601 tcaatcgaat acgtttccta gtggagtga cttacgcgg tccaagtaag cagtgccagt  
661 gcaagtgaag tgaagtctct agtgaaaaag agtgatcaa ttgaccagag gagaaaattt  
721 cagagtgaac aaagcttct tcaaggaca attactatta aatttgtgaa agtgcatttc  
781 ggtgaaggga atcttctagt gaaggtagg aaattaaatg atgaaattat agctatgagc  
841 gaaaactagt ttggtgaatg attccttct ctttgaatga gcaactatt ttcaagatg  
901 gcgactattg agctttgagt gattagtga aatttgaac gcagttcat catcattgat  
961 aaaaccaat tgtgattcac ggcgataatc atattcgtt gaatcatcgc tgctaattga  
1021 attaaattc tagagcaagc gcgaattcgc catatttcta aaattaaata ttgtggtgat  
1081 aattacctat taagtaata ttaacacata tcgagaaaaa ccttgaggaa atcgtgaaaa  
1141 cttgaagata cgcaatttcc aaactacgta gttcaaagtc gaaaacaagt taattttca  
1201 ctaaaaagta gggcgttgtt gtgacgtcat cacctcaag tgatatattt tcaattggcc  
1261 tgcgactgca aacgcagaca aagcaaaaca agttaaaac ctgtcgtgtc gtgctcgaag  
1321 ccaaggcaa tgaatcaata tcaaatgaga gtttgcattt cacaaccaat tactgaagcg  
1381 ttcctcgtt tcttttctg ctaacagag attcaacaa tggcaccaa gaagaaact  
1441 aaagtgggaa tacacggtgt cccggctgcg ggatcctcgc tcgacgacga gcacatact  
1501 tcggcactgc tcaatcgga cgacgagta gtaggcgagg attcggacag cgagatcagc  
1561 gatcacgtct ccgaggacga tgttcaaagc gacacagagg aagccttcat tgacgaagta  
1621 cacgaggtgc aaccgacaag ctgaggatcg gaaatcctcg atgagcagaa tgcacatgag  
1681 cagccaggaa gtagcctggc gtcgaacaga atcttaacc taccgcagcg aaccattagg  
1741 ggtaaaaaca aacctgttg gtcaccagt aagagcacc gccgcagccg tcttcccg  
1801 ttgaacattg tgcgctgca gcgtggccct acccgcatgt gtaggaatat ttacgatccg  
1861 ctcttgtgtt taaactctt tttactgac gagatcattt ccgaaattgt gaagtggacg  
1921 aacgcagaga tctcgtgaa gcgtcgcgag tcgatgacag gcgctacctt tctgacacg  
1981 aacgaggacg agatctacgc gttctcggc atcctcgtga tgactgcagt ccggaaggac  
2041 aatcatatgt cgaccgatga cctctcgcg cgttcaatca gcatggtgta cgtgtcggg  
2101 atgtcgcgcg accgttcca tttcctgatt cgggtgtctgc ggatggacga caagtcgat  
2161 agaccacgt tgcgtgagaa tgatgtttt acgccagtgc gcaagatctg ggatctctc  
2221 atccaccagt gtaffcagaa ctacacacc gccgcccacc tgaccatcga cgagcagctg  
2281 ctgggttttc gcggtgatg cccattccgc atgtacatcc ccaacaagcc aagcaagat  
2341 ggcatcaaga tctgatgat gtgcgattt ggtaccaagt acatgatcaa cgggatgcca

2401 tacctgggcc gcggcacgca gacgaacgga gttccgctgg gtgagtacta cgtcaaagaa  
2461 ctgtctaagc cctccacgg ctctgtcgg aacattacat gcgataactg gttcaccagc  
2521 atccctctgg caaagaatct cctgcaggag ccctacaagc tgaccatcgt cggcacgggt  
2581 cgctcgaaca agcgggagat cccggagggtg ctgaagaact cccgtagtgc tccggtcggc  
2641 acctccatgt tctgtttcga cggcccgtg accttagtgt cgtataagcc gaagccggcc  
2701 aagatggtgt acttactgtc cagctgtgac gaggacgcca gcatcaacga gtcgaccggc  
2761 aagccgcaga tggatgata ctataaccag accaagggtg gtgtcgatac gctggaccag  
2821 atgtgctctg ttatgacatg cagtcgcaag acgaatcgtt ggccgatggc actgctgtac  
2881 ggaatgatca acatcgctg cattaacagc ttattatct actcgcataa cgtgtctagc  
2941 aagggagaga aggtgcagtc gagaaagaag ttatgcgca atctgtacat gagtctgacg  
3001 agctccttca tgcgcaagcg cctggaaget cggacgctga agcgtactct acgcgataac  
3061 atcagcaaca tctgcccga cggaggtccg ggaacgctgg atgactcgac agaggagccg  
3121 gttatgaaga agcgcacgta ctgcacgtac tgcccgtcga agatccgccg caaggccaac  
3181 gcgtcgtgca agaagtgcaa gaaggtcact tgcgcgagc ataacatcga catgtgccag  
3241 agttgctct aagctagcta gacataatca gccataccac attgttagag gtttacttg  
3301 ctftaaaaaa cctcccacac ctcccctga acctgaaca taaatgaat gcaattgtg  
3361 ttgtaactt gttattgca gttataatg gttacaaata aagcaatagc atcacaatt  
3421 tcacaaataa agcattttc ttcactgcat tctagtgtg gttgtccaa actcatcaat  
3481 gtatcgttag cccattagga tgtgcggctt atcccctata gtgagtcgta ttacatggtc  
3541 atagctgttt cctggcagct ctggcccgtg tctcaaaatc tctgatgta cattgcacaa  
3601 gataaaaata tatcatcatg aacaataaaa ctgtctgctt acataaacag taatacaagg  
3661 ggtgttatga gccatattca acgggaaacg tgcaggccgc gattaaatc caacatggat  
3721 gctgatttat atgggtataa atgggctcgc gataatgctg ggcaatcagg tgcgacaatc  
3781 tatccttgt atgggaagcc cgatgcgcca gagtgtttc tgaacatgg caaaggtagc  
3841 gttgcaatg atgttacaga tgataggtc agactaaact ggctgacgga atttatgctt  
3901 ctccgacca tcaagcattt taccgtact cctgatgatg catggttact caccactgcg  
3961 atccccgaa aaacagcatt ccaggatta gaagaatc ctgattcagg tgaatatatt  
4021 gttgatgcgc tggcaggtt cctgcgccgg ttgcattcga ttctgtttg taattgtcct  
4081 tttaacagcg atcgcgtatt tctctcgtc caggcgcaat cacgaatgaa taacggttg  
4141 gttgatgcga gtgatttga tgacgagcgt aatggctggc ctgttgaaca agtctggaaa  
4201 gaaatgcata aacttttgc attctaccg gattcagtc tactcatgg tgatttca  
4261 cttgataacc ttattttga cgggggaaa ttaataggtt gtattgatg tggacgagtc  
4321 ggaatcgag accgatacca gcatcttgc atcctatgga actgcctcgg tgagttttc  
4381 cttcattac agaaacggct tttcaaaaa tatggtattg ataactcga tatgaataa  
4441 ttgcagttc attgatgct cgatgagtt tttaactcag aattggttaa ttggtttaa  
4501 cactggcaga gcattacgt gactgacgg gacggcgcaa gctcatgacc aaaatccctt  
4561 aacgtgagtt acgctcgtt cactgagcg tcagacccc tagaaaagat caaaggatct  
4621 tottgagatc cttttttct gcgcgtaac tctgcttgc aaacaaaaa accaccgcta  
4681 ccagcggagg tttgttgc ggatcaagag ctaccaactc ttttccgaa ggtaactggc  
4741 ttcagcagag cgcagatacc aaatactgtt ctctagtgt agccgtagt aggccaccac  
4801 tcaagaact ctgtagcacc gctacatac ctgctctgc taactctgtt accagtggct  
4861 gctgccagt gcgataagtc gtgtcttacc gggttggact caagacgata gttaccggat  
4921 aagggcagc ggtcgggctg aacgggggt tctgacac agcccagctt ggagcgaacg  
4981 acctacacc aactgagata cctacagcgt gagctatgag aaagcggcc gttcccga  
5041 ggggaaaagg cggacagga tccggtaac ggcagggtc gaaacaggaga gcgcacgagg  
5101 gagctccag ggggaaacgc ctggtatct tatagtctc tgggttctg ccacctga  
5161 cttgagcgtc gattttgtg atgctcgtca gggggcgga gcctatgaa aaacgccagc  
5221 aacgggctt tttacggtt cctggcctt tctggcctt ttgctecat gttcttct  
5281 gcgttatecc ctgattctg ggataaccgt attaccgct ttgagtgage tgataccgct  
5341 gcggcagcc gaacaccga gcgcagcag tcagtgage aggaagcgg agagcggcca  
5401 atacgcaaac cgcctctccc cgcgcgttg ccgattcatt aatgcagctg gcacgacagg

5461 ttcccgact ggaaagcggg cagtgagcg aacgcaatta atacgcgtac cgctagccag  
5521 gaagagttg tagaaacgca aaaaggccat ccgtcaggat ggccttctgc ttagttgat  
5581 gcctggcagt ttatggcggg cgtcctgccc gccaccctcc gggccgttgc tcacaacgt  
5641 tcaaatccgc tcccgcgga ttgtcctac tcaggagagc gttaccgac aaacaacaga  
5701 taaaacgaaa ggcccagtct tccgactgag ctttcgtt tatttgatgc ctggcagtc  
5761 cctactctcg cgtaacgct agcatggatg tttcccagt cagcagtg taaaacgacg  
5821 gccagtctta agctcgggcc cctacagtc actaatacca tctaagtagt tgattcatag  
5881 tgactggata tgttggtt tacagtatta ttagtctgt ttttatgca aaatcaatt  
5941 taatatattg atatttat catttacgt ttctgttca actttctat acaaagttgg  
6001 taccgggccccc

//

**7. pattBPUb-GFP, attB site-containing plasmid expressing GFP under control of the *Ae. aegypti* Pub promoter, inserted in the m-linked attP site of *Ae. albopictus* strain mX1 derived from m-albR9**

LOCUS attBPUbGFP 4729 bp ds-DNA circular SYN 19-OCT-2020  
DEFINITION synthetic circular DNA  
SOURCE synthetic DNA construct  
ORGANISM recombinant plasmid  
FEATURES Location/Qualifiers  
source 1..4729  
/organism="recombinant plasmid"  
/mol\_type="other DNA"  
misc\_feature 537..552  
/label=M13F  
/note="M13F"  
promoter 564..1944  
/label=AePUB promoter  
3'UTR join(1152..1330,1935..1944)  
intron 1331..1934  
/label=3'UTRintron  
CDS 1946..2662  
/codon\_start=1  
/product="enhanced GFP"  
/label=EGFP  
/note="mammalian codon-optimized"  
/translation="MVSKGEELFTGVVPILVELDGDVNGHKFSVSGEGEGDATYGKLT  
KFICTTGKLPVPWPTLVTTLTYGVQCFSRYPDHMKQHDFFKSAMPEGYVQERTIFFKDD  
GNYKTRAEVKFEGDTLVNRIELKGIDFKEDGNILGHKLEYNYNSHNVYIMADKQKNGIK  
VNFKIRHNIEDGSVQLADHYQQNTPIGDGPVLLPDNHYLSTQSALS KDPNEKRDHMVLL  
EFVTAAGITLGMDELYK"  
polyA\_signal 2787..2869  
/label=SV40 poly(A) signal  
/note="SV40 polyadenylation signal"  
misc\_feature 2911..2966  
/label=attB 2  
/note="attB 2"  
misc\_feature 2914..2951  
/label=minimal attB  
/note="minimal attB"  
misc\_feature complement(2990..3008)  
/label=M13R  
/note="M13R"

ORIGIN

1 ctttctcgcg ttatcccctg attctgtgga taaccgtatt accgccttgg agtgagctga  
61 taccgctcgc cgcagccgaa cgaccgagcg cagcgagtca gtgagcgagg aagcgggaaga  
121 ggccecaata cgcaaaccgc ctctcccgc gcgttgcccg attcattaat gcagctggca  
181 cgacaggttt cccgactgga aagcgggcag tgagcgcaac gcaattaata cgcgtaccgc  
241 tagccaggaa gagttgttag aaacgcaaaa aggccatccg tcaggatggc cttctgctta  
301 gtttgatgcc tggcagttta tggcgggct cctgcccgcc accctccggg cgttgcttc  
361 acaacgttca aatccgctcc cggcggattt gtcctactca ggagagcgtt caccgcaaaa

421 caacagataa aacgaaagc cagctctcc gactgagcct ttcgtttat ttgatgctg  
481 gcagttccct actctcgcgt taacgctagc atggatgfff tcccagtcac gacgftgtaa  
541 aacgacggcc agtcttaaga tccatcttta catgtagctt gtgcattgaa tccaattata  
601 atttgccttg gcaccagctg agccagacaa gaaagaaagc ttcccagaag tatatcgatt  
661 tagaagggtt gacgtcactt tgctgactgc actaatcacg caaatgatac aattagaatg  
721 attcaagtga aattcccaaa ttactgctt gtctctggat ttggttatca gattacattc  
781 gaagctaaga atagctaccg aaattgtcga tcaaatcagg aaatccttc tctatcgaaa  
841 aaggcattcg cacatcttc tctgtatgcc atatacacga atggtaggta cattgacgtc  
901 ttgcccagaa gttgaactgc atcgttcaag gtacagaatg aacgactaac agacacaagc  
961 acgttttctg tccattcag acacagggat ggtaccata gtcgatcgat tttagagccat  
1021 ccaaccgaac agaggtatat gtatgaatgg attgcagaaa tttctagaa gtacaaccac  
1081 cactacggca gtgtctataa aacgccctg caaaggcaaa accagctcaa tcgaatacgt  
1141 ttctagtgg agtgaacatt acgcggcca agtaagcagt gccagtgcaa gtgaagtgaa  
1201 gtctctagg aaaaagagtg atccaattag ccagaggaga aaattcaga gtgaacaaag  
1261 cttgttcaa aggacaatta ctattaaatt tgtgaaagtg cattcgggtg aagggaatct  
1321 tctagtgaag gtaggtaaat taaatgatga aattatagct atgagcgaaa actagtttgg  
1381 tgaatgattc cttgtcttt gaatgagcaa actatttcc aagatggcga ctattgagct  
1441 ttgagtatt agtgaatgt tgcaacgcag ttcatcacc attgataaaa cccaattgtg  
1501 attcacggcg ataatacat ttcgttgaat catcgtctgt aattgaatta aatttctaga  
1561 gcaagcgcga attcgccata ttctaaaat taaatattgt ggtgataatt acccattaag  
1621 gtaataataa cacatataa gaaaaacct gaggaatcg tgaacttg aagatacga  
1681 atttcaaac tacgtatgc aaagtcgaaa acaagttaatt tttcactaa aaagtagggc  
1741 gttgttga cgctatcacc tcaagtga tttttcac ttggcctgcg actgcaaacg  
1801 cagacaaaagc aaaacaagt taaaacctgt cgtgtcgtgc tcgaagccaa aggcaatgaa  
1861 tcaatatcaa atgagagttt gcattcaca accaattact gaagcgttc ctcgtttct  
1921 tttctgctca acagagattt caacaatgtt gagcaagggc gaggagctgt tcaccgggtt  
1981 ggtgcccatc ctggtcagc tggacggcga cgtaaacggc cacaagtca gcgtgtccgg  
2041 cgagggcgag ggcgatgcca cctacggcaa gctgacctg aagttcatct gcaccaccg  
2101 caagctgccc gtgccctggc ccacctcgt gaccacctg acctacggcg tgcagtgtt  
2161 cagccgtac cccgaccaca tgaagcagca cgacttctc aagtccgcca tgcggaagg  
2221 ctacgtccag gagcgacca tcttctcaa ggacgacggc aactacaaga cccgcgccga  
2281 ggtgaagtgc gagggcgaca cctggtgaa ccgcatcgag ctgaagggca tcgactcaa  
2341 ggaggacggc aacatctgg ggcacaagct ggagtacaac tacaacagcc acaactcta  
2401 tatcatggcc gacaagcaga agaacggcat caaggtgaac tcaagatcc gccacaacat  
2461 cgaggacggc agcgtgcagc tcgccacca ctaccagcag aacacccca tcggcgacgg  
2521 cccctgctg ctgcccgaca accactacct gagcaccag tccgccctga gaaagacc  
2581 caacgagaag cgcgatcaca tggcctctg ggagtctgt accgcccgg ggtactctt  
2641 cggcatggac gagctgtaca agtaaagcgg ccgcgactct agatcaaatc agccataca  
2701 cattttaga ggttttactt gcttaaaaa acctcccaca cctccccctg aacctgaaac  
2761 ataaaatgaa tgcaattgtt gttgtaact tgtttattgc agcttataat ggttacaat  
2821 aaagcaatag catcacaat ttcaacaata aagcattttt ctactgca ttctagtgt  
2881 ggtttgtcca aactcatcaa tgtatcctt tgcgggtgcc agggcgtgcc ctgggctcc  
2941 cgggcccgt actccacct accatattc cctatagtga gtcgtattac atggtcatag  
3001 ctgttctctg gcagctctgg cccgtgtctc aaaatctctg atgttacatt gcacaagata  
3061 aaaatatac atcatgaaca ataaaactgt ctgcttaccat aacagtaat acaaggggtg  
3121 ttatgagcca tattcaacgg gaaacgtcga ggcccggatt aaattccaac atggatgctg  
3181 atttatatgg gtataatgg gctcgcgata atgtcgggca atcaggtgag acaatctatc  
3241 gctgtatgg gaagcccgat gcgccagagt tgtttctgaa acatggcaaa ggtagcgttg  
3301 ccaatgatgt tacagatgag atggtcagac taaactggct gacggaattt atgcctctc  
3361 cgaccatcaa gcttttatc cgtactcctg atgatgatg gttactcacc actgcgatcc  
3421 cggaaaaaac agcattccag gtattagaag aatatactga ttcaggtgaa aatattgtt



3481 atgcgctggc agtgttctg cgccgggtgc atcgattcc tgtttgtaat tgcctttta  
3541 acagcgatcg cgtatttctg ctcgctcagg cgcaatcacg aatgaataac ggtttgggtg  
3601 atgcgagtga ttttgatgac gagcgtaatg gctggcctgt tgaacaagtc tggaaagaaa  
3661 tgcataaact tttgccattc tcaccggatt cagtcgtcac tcatggtgat ttctcactg  
3721 ataacctat tttgacgag gggaaattaa taggtgtat tgatgttga cgagtcggaa  
3781 tcgagaccg ataccaggat ctgccatcc tatggaactg cctcgggtgag ttttctcct  
3841 cattacagaa acggctttt caaaaatatg gtattgataa tctgatatg aataaattgc  
3901 agtttcattt gatgctcgat gagttttct aatcagaatt ggtaattgg ttgtaacct  
3961 ggcagagcat tacgctgact tgacgggacg gcgcaagctc atgacaaaaa tccttaacg  
4021 tgagttacgc gtcgttccac tgagcgtcag acccgtaga aaagatcaaa ggatcttct  
4081 gagatcctt tttctgccc gtaatctgct gcttgcaaac aaaaaacca ccgctaccg  
4141 cggtggttg tttgccgat caagagctac caactcttt tccgaaggta actggcttca  
4201 gcagagcgca gatacaaat actgttctc tagttagcc gtagttaggc caccactca  
4261 agaactctg agcaccgct acatacctc cctgctaact cctgttacca gtggctgctg  
4321 ccagtggcga taagtcgtg ctaccgggt tggactcaag acgatagta ccgataagg  
4381 cgcagcggc gggctgaacg gggggttcgt gcacacagcc cagcttgag cgaacgacct  
4441 acaccgaact gagataccta cagcgtgagc tatgagaaag cgccacgctt cccgaaggga  
4501 gaaaggcggc caggtatccg gtaagcggc gggtcggaac aggagagcgc acgagggagc  
4561 ttccaggggg aaacgctgg tatcttata gtcctgctgg gttcggccac ctctgactg  
4621 agcgtcgatt tttgtatgc tcgtcagggg ggcggagcct atggaaaaac gccagcaacg  
4681 cggcctttt acggttctg gccttttct ggcttttgc tcacatgtt

//

## 8. Helper plasmid (piggyBac construct) used to express PhiC31 integrase under control of the PUB promoter

LOCUS pB Pub-phiC31 integrase 7924 bp ds-DNA circular SYN 07-OCT-2021  
DEFINITION synthetic circular DNA.  
ACCESSION .  
VERSION .  
KEYWORDS .  
SOURCE synthetic DNA construct  
ORGANISM synthetic DNA construct  
REFERENCE 1 (bases 1 to 7924)  
AUTHORS Li  
TITLE Direct Submission  
JOURNAL Exported Thursday, Oct 7, 2021 from SnapGene 5.2.5  
<https://www.snapgene.com>  
FEATURES Location/Qualifiers  
source 1..7924  
/organism="synthetic DNA construct"  
/mol\_type="other DNA"  
primer\_bind 4..20  
/label=M13 rev  
/note="common sequencing primer, one of multiple similar variants"  
misc\_feature complement(61..196)  
/label=PiggyBac 5'TR  
/note="PiggyBac 5'TR"  
misc\_feature 77..95  
/label=TR2  
/note="TR2"  
misc\_feature complement(371..379)  
/label=attP'  
/note="attP"  
promoter 387..1767  
/label=AePUB promoter  
primer\_bind 387..416  
/label=PUBFw-taag  
3'UTR join(975..1153,1758..1767)  
intron 1154..1757  
/label=3'UTRintron  
CDS 1781..1801  
/codon\_start=1  
/product="nuclear localization signal of SV40 large T antigen"  
/label=SV40 NLS  
/translation="PKKKRKV"  
CDS 1817..3631  
/codon\_start=1  
/label=integrase  
/note="integrase"  
/translation="DTYAGAYDRQSRERENSSAASPATQRSANEDKAADLQREVERDGG  
RFRFVGHFSEAPGTSAFGTAERPEFERILNECRAGRLNMIIVYDVS RFSRLKVM DA IPI  
VSELLALGV TIVSTQEGVFRQGNVMDLIHLIMRLDASHKESLKS AKILD TKNLQRELG

GYVGGKAPYGFELVSETKEITRNGRMVNVVINKLAHSTTPLTGPFEFEPDVIRWWWREI  
KTHKHLPFKPGSQAAIHPGSITGLCKRMDADAVPTRGETIGKKTASSAWDPATVMRILR  
DPRIAGFAAEVIYKKKPDGTPTTKIEGYRIQRDPITLRPVELDCGPIIPEAEWYELQAW  
LDGRGRGKGLSRGQAILSAMDKLYCECGAVMTSKRGEESIKDSYRCRRRKVVDPSAPGQ  
HEGTCNVSMALDKFVAERIFNKIRHAEGDEETLALLWEAARRFGKLTEAPEKSGERAN  
LVAERADALNALEELYEDRAAGAYDGPVGRKHFRKQQAALTLRQQGAEERLAELEAAEA  
PKLPLDQWFPEDADADPTGPKSWWGRASVDDKRVFVGLFVDKIVVTKSTTGRGQGTPIE  
KRASITWAKPPTDDDEDDA QDGTEDVAA"

misc\_feature 3636..3858

/label=SV40 term

/note="SV40 term"

polyA\_signal 3739..3821

/label=SV40 poly(A) signal

/note="SV40 polyadenylation signal"

misc\_feature 3864..4164

/label=18xP3

/note="3xP3"

promoter 4165..4374

/label=Hsp70 minimal promoter

misc\_feature 4204..4209

/label=TATA

/note="TATA "

CDS 4375..5094

/codon\_start=1

/product="enhanced GFP"

/label=EGFP

/note="mammalian codon-optimized"

/translation="MVSKGEELFTGVVPILVELDGDVNGHKFSVSGEGEGDATYGKLT

KFICTTGKLPVPWPTLVTTLTYGVCFSRYPDHMKQHDFFKSAMPEGYVQERTIFFKDD

GNFKTRAQEVKFEGLDNLVRIELKGIQDFKEDGNILGHKLEYNYNSHNVYIMADKQKNGIK

VNFKIRHNIEDGSVQLADHYQQNTPIGDGPVLLPDNHLYLSTQSAISKDPNEKRDHMLL

EFVTAAGITLGMDELYK"

polyA\_signal 5216..5297

/label=SV40 poly(A) signal

/note="SV40 polyadenylation signal"

misc\_feature complement(5446..5603)

/label=original PiggyBac 3'region

/note="original PiggyBac 3'region"

misc\_feature 5555..5575

/label=direct repeat

/note="direct repeat"

misc\_feature complement(5591..5603)

/label=TR1

/note="TR1"

primer\_bind complement(5733..5749)

/label=M13 fwd

/note="common sequencing primer, one of multiple similar variants"

terminator 5914..5941

/label=rnB T2 terminator

/note="transcription terminator T2 from the E. coli"

rrnBgene"  
rep\_origin complement(6271..6859)  
/direction=LEFT  
/label=ori  
/note="high-copy-number ColE1/pMB1/pBR322/pUC origin of replication"

CDS complement(7006..7815)  
/codon\_start=1  
/gene="aph(3')-Ia"  
/product="aminoglycoside phosphotransferase"  
/label=KanR  
/note="confers resistance to kanamycin in bacteria or G418 (Geneticin(R)) in eukaryotes"  
/translation="MSHIQRETSRPLNSNMDADLYGYKWARDNVGQSGATIYRLYGKP  
DAPELFLKHGKGSVANDVTDEMVRNLNWLTEFMPLPTIKHFIRTPDDAWLLTTAIPGKTA  
FQVLEEYPDSGENIVDALAVFLRRLHSIPVCNCPFNDRVFLRAQAQSRMNNGLVDASD  
FDDERNGWPVEQVWKEMHKLLPFSPDSVVTHGDFSLDNLIFDEGKLGICIDVGRVGIAD  
RYQDLAILWNCLGEFSPSLQKRLFQKYGIDNPD MNKLQFHLMLDEFF"

misc\_feature 7886..7904  
/label=pDONR-RP  
/note="pDONR-RP"

#### ORIGIN

1 tgccaggaaa cagctatgac catgtaatac gacgatatga tctgatgca gctagattaa  
61 ccctagaaa atagtctgcg taaaattgac gcatgcattc tgaaatatt gctctctctt  
121 tctaatagc gcaatccgt cgctgtgcat ttaggacatc tcagtcgccc cttggagctc  
181 ccgtgaggcg tgcctgtcaa tgcggtaagt gtcactgatt tgaactata acgaccgctg  
241 gagtcaaat gacgcatgat tatcttttac gtgactttta agatttaact catacgataa  
301 ttatattgtt attcatggt ctacttacgt gataacttat tatatatata tttcttgtt  
361 atagattaga tcgcgctcgc ggatccatct ttacatgtag cttgtgcatt gaatccaatt  
421 ataattgcc ttggcaccag ctgagccaga caagaaagaa agcttcccag aagtatatcg  
481 atttagaagg gttgacgta ctttgcctgac tgcactaata cagcaaatga tacaattaga  
541 atgattcaag tgaattccc aaattactgc tttgtctctg gatttggtta tcagattaca  
601 ttcgaagcta agaatagcta ccgaaattgt cgatcaaate aggaaatcct ttctctatcg  
661 aaaaaggcat tcgcacatct ttctctgtat gccatataca cgaatgtag gtacattgac  
721 gtctttgcca gaagtgaac tgcacgttc aaggtagaca atgaacgact aacagacaca  
781 agcacgtttt gctgtccatt cagacacagg gatggtacc atagtcgac gatttagagc  
841 catccaaccg aacagaggtat tatgtatgaa tggattgcag aaattttcta gaagtacaac  
901 caccactacg gcagtgctc taaaacgccc ctgcaaaggc aaaaccagct caatcgaata  
961 cgtttcctag tggagtgaac attacgctg ccaagtaagc agtgccagtg caagtgaagt  
1021 gaagtctccta gtgaaaaaga gtgatccaat tagccagagg agaaaatttc agagtgaaca  
1081 aagctttgtt caaaggacaa ttactattaa atttgtgaaa gtgcatttcg gtgaagggaa  
1141 tcttctagtg aaggtaggta aattaaatga tgaattata gctatgagcg aaaactagtt  
1201 tggtagaatga ttcctttgctc ttgaaatgag caaactattt tccaagatgg cgactattga  
1261 gctttgagtg attagtgaat atttgcaacg cagtttcac atcattgata aaaccaatt  
1321 gtgattcacg gcgataatca tatttcggtt aatcatcgcct gctaattgaa taaatttct  
1381 agagcaagcg cgaattgcc atatttctaa aattaaat tgtggtgata attaccatt  
1441 aaggtaatat taacacatat cgagaaaaac cttgagggaaa tcgtgaaaac tgaagatac  
1501 gcaattcca aactacgtag tcaaaagtcg aaaacaagtt aattttcac taaaagtag  
1561 ggcgttgtg tgacgtcacc acctcaagt gtatatattt cacttggcct gcgactgcaa  
1621 acgcagacaa agcaaaaaca gtttaaaacc tctcgtgctg tctcgaagc caaaggcaat  
1681 gaatcaatat caaatgagag tttgcattc acaaccaatt actgaagcgt ttctcgtt

1741 cttttctgc tcaacagaga ttcaacaat gagcggccct ccaaaaaaga agagaaaggt  
1801 agaagaccgg ggcggcgaca cgtacgcggg tgcttacgac cgtcagtcgc gcgagcgcga  
1861 aaattcgagc gcagcaagcc cagcgacaca gcgtagcgcc aacgaagaca aggcggccga  
1921 ccttcagcgc gaagtgcgagc gcgacggggg ccggttcagg ttcgtcgggc atttcagcga  
1981 agcgccgggc acgtcggcgt tcgggacggc ggagcggccg gagttcgaac gcatcctgaa  
2041 cgaatgccgc gccggggcgc tcaacatgat cattgtctat gacgtgctgc gcttctcgcg  
2101 cctgaaggtc atggacgcga ttccgattgt ctggaattg ctgcccctgg gcgtgacgat  
2161 tgttccact caggaaggcg tcttccggca gggaacgctc atggacctga ttcacctgat  
2221 tatgcggctc gacgcgtcgc acaagaatc ttcgctgaag tcggcgaaga ttctcgacac  
2281 gaagaacctt cagcgcgaat tggcgggta cgtcggcggg aaggcgcctt acggcttcca  
2341 gcttgttgc gagacgaag agatcacgc caacggccga atggtcaatg tcgtcatcaa  
2401 caagcttgc cactcgacca ctcccctac cggaccctc gagttcgagc ccgacgtaat  
2461 ccggtgtggg tggcgtgaga tcaagacgca caaacacctt ccttcaagc cgggacgta  
2521 agccgccatt caccgggca gcatcacggg gctttgtaag cgcatggacg ctgacgccgt  
2581 gccgaccgg ggcgagacga ttgggaagaa gaccgctca agcgcctggg acccggcaac  
2641 cgttatgcga atcctcggg acccgcgtat tgcgggctc gccgctgagg tgatctaaa  
2701 gaagaagccg gacggcacgc cgaccacgaa gattgagggt taccgcttc agcgcgacc  
2761 gatcacgctc cggccgctc agcttgattg cggaccgatc atcgagcccg ctgagtggta  
2821 tgagcttca gctgtgttg acggcagggg gcgcggcaag gggcttccc gggggcaagc  
2881 cattctgcc gccatggaca agctgtactg cgagtgtggc gccgtcatga ctccaagcg  
2941 cggggaagaa tcgatcaagg actctaccg ctgccctgc cggaaggtgg tcgaccgctc  
3001 cgcacctggg cagcacgaag gcacgtgcaa cgtcagcatg gcggcactc acaagttcgt  
3061 tgcggaacgc atctcaaca agatcaggca cccgaaggc gacgaagaga cgttggcgct  
3121 tctgtgggaa gcccccgc gcttcggca gctcactgag gcgcctgaga agagcggcga  
3181 acgggcgaac ctgttcgg agcgcgccga ccccgaac gccctgaag agctgtacga  
3241 agaccgcgc gcagggcgt acgacggacc cgttggcagg aagcactcc ggaagcaaca  
3301 ggcagcgtc acgctccgc agcaaggggc ggaagagcgg ctgccgaac ttgaagccgc  
3361 cgaagcccc aagctcccc ttgaccaatg gttccccgaa gacgccgacg ctgaccggac  
3421 cggccctaa tcgtgtggg ggcgcgcgc agtagacgac aagcgcgtgt tcgtgggct  
3481 ctctagac aagatcgtg tcacgaagtc gactacggg agggggcagg gaacccccat  
3541 cgagaagcgc gcttcgatca cgtggcgaa gccgccgacc gacgacgacg aagacgacgc  
3601 ccaggacggc acggaagacg tagcggcgta gtaagcataa tcagccatac cacatttga  
3661 gaggtttac ttgctttaa aaactcccc cacctcccc tgaacctgaa acataaaatg  
3721 aatgcaattg ttgtgttaa ctgtttat gcagctata atggttcaa ataaagcaat  
3781 agcatcaaaa attcaaaa taaagcattt ttctcactg cattctagtt gtggtttgc  
3841 caaactcact aatgtatcta agtatctaat tcaattagag actaattcaa ttagagtcta  
3901 attcaattag agttatctaa ttcaattaga gactaattca attagagtct aattcaatta  
3961 gagttatcta attcaattag agactaattc aattagagtc taattcaatt agagttatct  
4021 aattcaatta gagactaatt caattagagt ctaattcaat tagagttatc taattcaatt  
4081 agagactaat tcaattagag tctaattcaa ttagagttat ctaattcaat tagagactaa  
4141 ttcaattaga gtaattcaa ttaggatcca agcttatcga ttcgaacctc gcgaccggc  
4201 gagtataaat agaggcgctt cgtctacgga gcgacaattc aattcaaca agcaaagtga  
4261 acacgtcgtc aagcgaagc taagcaata aacaagcgc gctgaacaag ctaacaatc  
4321 ggggtaccgc tagagtcgac ggtaccggc gcccgggatc caccggtcgc caccatggtg  
4381 agcaagggcg aggagctgtt caccggggtg gtgccatcc tggtcagct gcgacggcgc  
4441 gtaaacggcc acaagttcag cgtgtccggc gagggcgagg gcgatgccac ctacggcaag  
4501 ctgacctga agttcatctg caccaccggc aagctggccc tggctggcc caccctcgtg  
4561 accacctga cctacggcgt gcagtcttc agccctacc ccgaccat gaagcagcac  
4621 gacttctca agtccgcat cccgaaggc tacgtccagg agccaccat ctcttcaag  
4681 gacgacggca actacaagac ccgcgccgag gtgaagttcg agggcgacac cctggtgaa  
4741 cgcacgcgac tgaagggcat cgactcaag gaggacggca acatcctggg gcacaagctg

4801 gagtacaact acaacagcca caacgtctat atcatggccg acaagcagaa gaacggcatc  
4861 aaggtgaact tcaagatccg ccacaacatc gaggacggca gcgtgcagct cgccgaccac  
4921 taccagcaga acaccccat cggcgacggc cccgtgctgc tgcccgacaa cactacctg  
4981 agcaccagc cggcctgag caaagacccc aacgagaagc gcatcacat ggtcctgctg  
5041 gagtctgta cggcggcg gatcactctc ggcatggacg agctgtacaa gtaaagcggc  
5101 cgcgacteta gatcaatca gccataccac attttagag gtttacttg ctttaaaaa  
5161 cctcccacac ctcccctga acctgaaaca taaaatgaat gcaattgtg ttgtaactt  
5221 gttattgca gctataatg gtacaaaata aagcaatagc atcacaatt tcacaataa  
5281 agcattttt tcactgcat ctggtgtgg ttgtccaaa ctcatcaatg tctgcttgt  
5341 aatctgca catgagctca atcgataaa agtttgtta cttatagaa gaaatttga  
5401 gttttgtt ttttaataa ataaataaac ataaataat tgtttgtga atttattt  
5461 agtatgtaag tgtaaatata ataaactta atatctatc aaataataa ataacctcg  
5521 atatacagac cgataaaaca catgctcaa tttacgcat gattatctt aacgtacgc  
5581 acaatatgat tatcttcta gggtaatct agctgctgt tctgcagct gtcgagcatc  
5641 tcatctget ccatcacget gtaaacaca ttgcaccgc gagtctgcc gtcctccacg  
5701 ggtcaaaaa cgtgaatgaa cgaggcgcgc tactggccg tegtttaca ggggatgct  
5761 tcatatata gaagactccc atctgtgtt tctcgggtaa cgctctctg agtaggacaa  
5821 atccggcggg agcggattg aacgttga agcaacggcc cggagggtgg cgggcaggac  
5881 gcccgccata aactgccagg catcaacta agcagaaggc catcctgacg gatggcctt  
5941 ttgctttt acaaactct cctggctagc ggtacgcgta ttaattgctg tgcgctact  
6001 gcccgcttc cagtcgggaa acctgctgt ccagctgcat taatgaatg gccaacgcg  
6061 ggggagaggc ggtttgctg ttggcgctc tccgcttcc tgcctactg actcgtcgcg  
6121 ctcgctgtt cggctcggc gageggtatc agctactca aaggcgtaa tacggtatc  
6181 cacagaatca ggggataacg caggaaagaa catgtgagca aaaggccagc aaaaggccag  
6241 gaaccgtaaa aaggccgct tctggcgtt ttccatagg ctccgcccc ctgacgagca  
6301 tcacaaaaat cagcgtcaa gtcagagggt gcgaaaccg acaggactat aaagatacca  
6361 ggcgtttcc cctggaagct cctcgtgct ctctctgtt ccgacctgc cgcttaccg  
6421 atactgtcc gcttttcc ctccgggag cgtggcgtt tctcatagct cacgtgtgag  
6481 gtatctcag tgggtgtag tegtctc caagctgggc tgtgtcacg aacccccgt  
6541 tcagccgac cgctgcct tatccgtaa ctatctctt gagtcaacc cgtaagaca  
6601 cgactatcg cactggcag cagccactgg taacaggatt agcagagcga ggtatgtagg  
6661 cgggtctaca gagttctga agtggtggc taactacggc tactagaa gaacagtatt  
6721 tggatctgc gctctgcta agccagtac ctccgaaaa agagttggt gctctgac  
6781 cggcaaaaa accaccgct gtagcgggtg tttttgtt tgcaagcagc agattacgcg  
6841 cagaaaaaaa gatatcaag aagatctt gatctttt acggggtctg acgctcagtg  
6901 gaacgacgc taactcag taaggatt tggcatgag ctgcccgt cccgtcaagt  
6961 cagcgtatg ctctccag gttaacca attaaccaat tctgattaga aaaactcact  
7021 gagcatcaa tgaactgca attattcat atcaggatta tcaataccat attttgaaa  
7081 aagccgttc tgtaatgaag gagaaaact accgaggcag ttccatagga tggcaagatc  
7141 ctggtatgg tctcgatc cgactctc aacatcaata caacctatta attcccctc  
7201 gtcaaaaata aggtatcaa gtgagaaatc acctagatg acgactgaat ccggtgagaa  
7261 tggcaaaagt ttatgattt cttccagac ttgtcaaca ggccagccat tacgctctc  
7321 atcaaatca ctgcatcaa ccaaacggtt atctctctg gattgctct gagcagacg  
7381 aaatacgcga tgcgtgtaa aaggacaatt acaacagga atcgaatgca accggcgcag  
7441 gaacactgcc agcgcata caatattt acctgaatca ggtattctt ctaatactg  
7501 gaatgctgt ttccgggga tgcagtggt gagtaacct gcatcatcag gactacggat  
7561 aaaatgctg atggtggaa gaggcataa ttccgtcagc cagtttagtc tgaccatctc  
7621 atctgtaaa tcatggcaa cgctacctt gccatgttc agaaacta ctggcgcac  
7681 gggttccca tacaagcag agattctgc acctgattgc ccgacattat cgcgagccca  
7741 ttataccca tataatcag catccatgtt ggaattaat cgcggcctc acgttcccg  
7801 tgaatatgg ctataaac ccttattt actgttatg taagcagaca gtttattgt

7861 tcatgatgat atatffffat cttgtgcaat gtaacatcag agatfftgag acacgggcca  
7921 gagc

//

**9. Genomic sequence flanking the Aal-M insertion on the 3' piggyBac side.** One Nanopore read was obtained, including 962bp in the piggyBac transposon and ~1400bp of flanking sequence. We corrected the Nanopore read by PCR, placing the forward primer in the piggyBac transposon and the reverse primer in the flanking sequence. Corrected sequence is displayed in capital letters while the remaining low-quality sequence is in lower case. The NCBI BLAST tool in "discontinued megablast" mode detected a fragmented hit on scaffold 16 with 100% query cover and 90% identity. The hit on scaffold 16 is located between the genes LOC109423234 (uncharacterized, 5-9kb on 5' side) and LOC115263786 (uncharacterized protein K02A2.6-like, 61-65kb on 3' side). According to the latest genomic assembly, scaffold 16 is located on chromosome 1, long arm at position 12 (1q12).

TTAAccacGAATTCTTTAGGGATTCCTCCAGAGTCCTACCAGAAATTCATTTAGGGATATCTCCAGGAAA  
TCCTTGAGAAATTCGTCAGGGATCCAGGAATTCCTCCAGAGTATCCTTCAGGCATTCCGGTCAGAAATC  
TTAAGGGGTTTCATCCTCGGATTTGTTTCAGCAATCCATCCATGAATTCATCAAGAATACGCTCTGCTGCTT  
CTGCAAATGAATCTTTTCAGAAATTCGTCCTGTGATTCTTTCAGGGATATTTATTATTGAGATTATTTTTTC  
CGAGAAATCCTTCAAGAAGTTATCCATTGATTTTTTCAAGAACTCCTCCACAAGTTTTTTCAGGGATGTT  
TAGAGAGTGTCTTCAATGATTCTTCCAAAAAATAGTCAAGTCACTCGTTTAGAAATTCCTCGGCAATA  
CCTCAAGGATTCCCTTCAGCGATTGTTTTAGGACTTATCCTAGGGGTTTGTCAAATATTACATAACGCTA  
AGGGGGAGAGAGGGGGTCTAGCTCTGTGTTACGATTCATACAACATTCTTAAAGTTTTTCATATAAAATTT  
GTTACGTGGGGGAGGGAGGGGTCTTAAATTGTGAAATTTTTCGTTACGTAATTTTGAAAGAACCTTA  
GGATTTCTTCAGGGATTCCACCAGGGACCTCCTTTCAGATTTTTTTTTTTGTAAGATTCTTTCAGAAATTT  
CTCCAAGAAATTGCCTAAAAATTTCCAGGAATCTCTTAAGCAGTTCCTTCAGGGATTGTATCAGGAATT  
CCTATACCTAATAAATCTTTCAGGGATTCTTCAAAGCAACACGCATGTTACAGAAGTGTACGGCAGTGC  
GCAAGGTTTTGTTTTTCGAAAAAGTCACTGTGACCTACTTTATACAAATAAGTACCTACATGCTTGAATCG  
CTTACAAACANTTTTTCCAGGGAATCTATCAGGAATTCACCCAGAGAAAACCTTTTTTGAATTTTCCCAG  
GGTTTGTCCGACAATTACCATAAGAAAAAGTATCAGGAGTCCCCTAGGAAWTCCTTCTCAAATTCCTTC  
ATTTTGAATATATTCTAGCGATTTCGTCTAGGAATCCCTTCAGGTGAATTTTCAGGATTTTTTCAAGAATTC  
ATTATTTGCGAGTTCTCCGGAAATACCTCAAGAATTTCTCCAGGGATTCTTACAGGAATACCTCGAGGG  
TTTCTCTAGTGGTAGTTACAAGTTTTAACGAGAAGCCTTCAgaattcttcaaagatccttcggaatacgtcccttgacattcctata  
ggattatgctcagggatgtttttattgtatatttgcacatacaactgtcttgcagataagaaagtatagcaaacatggaaagagagtgtcggagaaactgaataaacgggaaa  
aaaacctggaacatatttggata



**10. Genomic sequence flanking the Aal-m insertion on the 3' piggyBac side.** In black: sequence confirmed by sequencing PCR products. In Blue: low-quality sequence (2x coverage) obtained from two Nanopore reads

TTAAGCTAGTATTTACATTCTGGTTTCCGATTTAGTTTAATAAGAATCAATCCGCAAACAGAGATAAGAT  
TTTGTATCCTGGCCCGAGGTAGTGGCTCACAATGGCTCAACGCAGACCCAAGCAACACAGAAAACATCT  
TTGGACCATCAGTATTTCCAAAGATGTTTTTTAAGTGAATTATAAGCGATTCAGAAAACATCTTGTGTTA  
ATATCCAGCTCTAATTATGCTGATCGAAAACAAACAACATCAAACATGTTATTGTCTATATCACGTATGA  
AATATGTTTATATAACTATCAGTGAATCAAAATTCAACCATCGCGCAACAATAATGACAATGTCGCAAC  
CTGTATTTGTTGCGACAAAACAACCCATGCGACATATGTTTGTCCCAACTTGAAAATAATGGGATTAACA  
TCGTACACCACGAGTTTAGAGATTTTAAGCCTTGCATTGCGATTTTCGAACGGTTACTTCGAGTCGGTAA  
ACACTGCAACTCTGGTGAAGCTCTATCATCAAACAGTTTCGACTTTGGATTAGTAATAATTGATTATTCA  
CGAGTTGAAAAGTACGCAACAAATTCAGCTTCCGTTTTGTCTGCAACAAAAAATTTTCGAGATCATGT  
TATCTGTCAACCAGTAGGGATAAAGACTATCCATCACATCTTCTTTGTTGCTTGT  
GATAATTCTCTTCACTGATAACTATTATATAACAGAAACATCAAGTTGCTAATTCAATCATATGTA  
AAAAGCAAACGCGACAGAACAACAGAAAGAAGATAAAAGATAAAAAATAAACCAAAATGCAAACAT  
TGTACCGTCTACCCCGATGGTTTGAACGACACCTCATGCAAACCAACGGGGTCTTTTTTTAATTT  
GAACTTTTAGTAACTCTGTGACATCAACAAACGTACTTTTGGTAACTTATTTGTTGTTTTGTT  
TTGATTCTGCGTCCGGTTCAACCTTCCATGGGCAGAATGACGTTTGAACCATTTTTAGTTTGA  
ACGATGTGCAGATTGGCAGGGGGTCAAATTA  
AAAAGTGTTCAGATTAGATGCTGTCAAACCAATGGGGGTAGACGGTATGCATTGATTTTAA  
CATTCTAGGAGGCTCTGGTCGATGGGGGAGAGTGAGTGGTTCAAGGGACCACGTCCCCACGT  
CCGACGAACGTCCCCGCGCTAATTAGGATCACCATACACAAATTTGGCCATCATCCTCAAGG  
CCAAAATGTACAGGCTGCTACCAACTGGTCTGTGCAACTACTATCCAGAAACACCGCGCA  
ACTTGTATTCCGGCCTATGTGAAAGAATCAGCATCCAACAGTCGGTGTCTATTCCA  
ACTCCAGCGTGAATTCCGGCACTCAA  
ACTTCACTCTCTGCCGTGTGCAGCATAGTTGTCCCATGTTCCAAAACAGCAA  
ACTGAGAAAAACGCGTTTTAAGTTTCAGCATTGTTTCCATCTCTACGGACAAGT  
GTAATAAAAAACACAAAATGAATCCACCATCATAGCGTTA  
GAATTGGTATTTATCATTGAAGTTTGAACAAAAAGTTTCATAAACATACA  
ATTTACTTTGATTACACGGTCCGACAAAAAATCAACTTTTGTCTG  
CCAGCTCWTAAATTTCACTTTTTCTGATTACTCCCGACTAGAA  
ACTCATAAATCCGAAGTTTTGACCACTCCCCCTCTGGGAGAGGRRGGGCATTGATTTTK  
RAAATTTTGA  
AAAATCGAAAAATTTGAGAGTTTTGACCGCCATTTGCGCTAAATGCACGATGTCA  
AAAAAAGGAAAAGGTTGACRCRGAGCTTTRGGGTTGTGCAACTATCAASWAAATTT  
CACGAAGATCCATCAAGCCATTCAAWSGAAACGGTGTTTTTACGAAATGATGTTTT  
ARAGATTTCTTATAKTGCACGCAAAGAATCCA  
ACTACTATATGGCACAATTGTTGATTTAATCATGTGCTTTAGCATCATRGTGTCTTCGAG  
GAAGTTTTTCACTACAATAACGTGCTTCTTTAACCTGTTGGTAAAAACGATCAAT  
CCCCCTAAAAGTGAGATAGAAAATTTCTTTTTAATTTTCAAGATRCAAGGTTGAT  
GTCTTCACAAGAGTTGTAGAAAATGCTGTTCTGAATAACTTTGTCAAAGACGCCAA  
ATTTCTARTAACTCCGTTAGTTTTCAAGATACGCTACGTTTTTCAATTACCGGCGG  
TCTCTGAAAGTGTTTTTTCACTCAATAACTTTTTTCACTTTTGATTCCACAATTT  
CTATTCTCATAGGTCAATCATTGACTTTCTAAAGGAGACA  
AKTACTTGTACTTTCGCATTTTGCATTACATTA  
AAAAGTTTTATTACTAGAGCTACAGAAAGATCTCGATAAARTAGYAGTGCTATTTTTG  
AAGGTTACATGATAGGGAATCGTAAAGCAA  
TGAAAAGCGAAATTAATTGTCTTCCGCTCAATAGTTATTTGTGGAGACTGTTAGG  
TGCGAACTTGYYS  
GCSCACTACTGYTATAAGCAAATGTAAGCAAATACCTCATA  
CAAATGCGAAAGTACAARTAAATTGTCTCTTTM  
GAAAGTCAAATGAGTAAGMCTATTGGAGACWGYGAGA  
ATTAATTGTGGAATCCAAAAGATGAAAAAGAAGTTATTGAG  
AAAAAACACTTTCAAGAGACCGCCSGCAMTGAAMYRTA  
ACGTAATCTTGAAACTAACGGAGTTMGCTAAATTT  
CATGGATATTCACCATCCATTGACACTCCAAGTATTTAG  
ATGATGTCGTTGATACTACAACGACCTTCATCATGGAAG  
CTTTAAAGA:A:GCATGCCCTCTACGGTCTGTGAAGAT  
CACAAGAGGAACCCCTTGG:TGGA  
ACTCTGATCTGGCGAA::ACTCAGGAAACAATGTAG  
AAAAACCTTTGCACAAATGTTTCCAGCTTG:AGTGAAG  
TCAGTCGGTTAAACAATTTCCTTGCGAAATCTAAGGAT  
TTCCGGTGAACGAACTTCGTTTGCAGARTGGCGATCTG  
ACTTCTCTGATGAGGAAGTTTTTGGAAATCTTATT  
CAGCACACAYTYCCTGGATGTGTGGATATTACATCTT  
CCGGATGATCCTGATGTCTTTTCTTGTAGTTATG  
ATTCTTTRGCTTTTTTAACTRTAGAATCGATTGAGT  
GGGCTCTAATAGCTTGTCTCTTCAAATCTCTG

GGGCRGATGGGATTTTRCCTATTTTGCTTCCAGAAGGGATTTGATTATTTCAAACATGTTTTGAAAAAAC  
TACTTGTTYRCAGTTTTGCTACARGGGTATATCCCAAATCCTGGCGGGATATTACTGTAAAAGTTTATTC  
CAAAAAGTGAGTCGTRMATMKTRTGAAGAARCAAAGAGTTTCAGACCTATCAGTTTGACCACTCTTTT  
CTTCWSAAATGCTWARAACGCAKTGTGGATCATCACATCMGTGATGTTTCATCTGGCCAACGATGCCTCT  
TCATGTGAACCAACATGCCTACCAATCTGGTAAGTCCACTGTGACTCTTTTACACAAGGTTGTTTACGAT  
ATCGAAGGCATTCGCTCCAAAAGCAATCTTGTTGGGGTGTTTTTCTTAGATATCGAGGGTGCCTTTGAC  
AACGTGCCTTTTCGATGCCATAWTGGAAGCCACTTTTGAGTCATGGTATATCTCCGATGATTTCCAATTRG  
ATTCACCAAATGCTCAAAAACCGATATCTCTTCTCGACAKTGCGTCTAGCRGRGWTWGGAAATTRGTGT  
TTGTGGATGCCCCCAAAGGGAATCTTATCACCGCTTTTGTGRRATCTCGTAGCRRATRCGCTATTGAGGT  
AACTCAATAATGSYAGCGKTTYCCTACTTAGYRGTTTTGCCGATGACTACCTARCATTGTTAGTTGGTAT  
GTGCATCAGCACCTTTTCARACCTGATGCAAAGCGCCCTTCAGGTAGTTGAGGGTTRRGTGTGCCAAT  
ATGGCCTTTTCRGTTAATCCGAARTRAAACATCTATTGTTCTTTTACSGRAAGGCGAAACCGTAATGGCC  
GTTTCGACCTTTTACGTCTCTTTTGATTCTGAAATCGATGTGACTGAACGGGTAAAGTACGTTGGAGTGC  
ATTCTTGATTCCAAGCTTTCTGGACACCTCRCATTGAGGTCAGAATCAAAGCTTAATATAGCCTTCRG  
GCAATGCCGGCGTACTTTTGARTRCAGCTWGGGTCTAAAACCCAAGTATATCAAATGGATTTACACAAC  
TGTRGTTTCGGCYAATAKTGGCTTATGGATGTCTTAKTAGTGGTAGCAAAGGGTGAAGTAGRGAACGGT  
CCAATCAAATTAGGCCATCTCCAAAGGATGWKMTTAAATAGCGATGTCCGGAGCGTTCTCTTCAACACC  
YRCGGCAGCGCTCGARGATTCTCTTTGACGTTGCCYYACTACWCGATCTCATMWCAAACAGAAGCACTT  
TCTTGCACTTACCGGTTACGGGTACTCGGTCTAGMKGAAACTCCTRRTAATGAAACGCACATCAACACAC  
CTCGTTGTTTTCRCTTYTGGTGAATTGGGACAAAATTGTTCTTGCTCCAAGTGATCTTACAATGGCTTGTA  
ATTTTCCATATAGGACATTTTYCACGRAATTCCCCTTCCMGGGAAGAGTGGACATCTGGTTATCTGGAAA  
GAAGTRTTTCAGACGGCATCGTATGTTACACTGATGRCTCCCTTCTCGAAGGTTCGAGCAGGTGCTGGTGT  
TTATTCTCGTGAGCTAARRCTGTATCAGTTTTACTCRCTYGGTGARWCACTRCACCGTTTTTTCAGGCCGA  
AATCTTTTGCTCTTATGTGCGGAGTGCAATCAGCACTTYTCAAGGGCGCYTGTTGTGAACCCATTGTGGT  
ACGCTTTGTGCACAKKTAAKTRCCCTCTTCCAGGGAGTATTTTTTCTATYTCCTACCTGTCCCTATCCCA  
TCCAAATCCTTTTCTTCTTTTCTCYCTCAGGTAGATGATGAAATAGGCTGTTATTTTTAGCGATGGCACA  
ATGCTCCCAAATGGAGGATAACGTGCCTCTGGRSCCGCCTTCTGATACCTGATACCTATCATTASTAAC  
CTTCAAATARYASYACATTTTATTGAGATCTTTCTGTAGCTCTAGTAATAAAACTTTTAATGCAAGTAC  
AAAATGCGAAAGTACAAGTAATTGTCTCCYTWAGAAAGTCAAATGATTGACCTATTGGAGACTGTGAG  
GAATAGAATTGTGGAATCAAAGTGAAGAAAAGAGTTATTGAGGAAAAAACACTTTTCRAGAMSKMTGGCY  
AAWSAAAACGTAAACGTATCTTGAAGAACTAACGGAGTTMYGAATTTGGCGTCTTCGACAAAGTTRTWC  
GAACAGCATTTTCTACAACCTTTGTGAAGACATCAACCTTGTATCTTGAAGAAATTAARAAGTAAATTT  
CTATCTCACTTTTAGGGGGGATTGATCGTTTTTACCWRYAGGTTAAAARRAGCACGTTATTGTAGTGAAA  
AACTTCCTCGRRRACACTGAWRWGTGCTAARCGACATGGTTAAATCAACAATTGTGCCATATAGTAGTTG  
GATTCTTTGCGTGCARTATAAAAAGAAATCTTTAAAACATCATTTTCGTAATAAATYACCGTTTTTCTCGAGA  
ATGGTTTGATGGATCTTCGTGAAATTTTGTGATAGTTGCACARCCTAAACRCTCCGTGGTCAACCTTTTT  
CCTTTTTGACATCGTGCATTTAGCCGAARTGRMGGTCSRAAAACCTCGAAATTTTTTCGATTTTTCAAAT  
TCAAATCAATGCCCTCYCCCTCTCCCAGGAGGGRGAGGTCAAACCTTCCCGGATTTATGAGTTTTCTAG  
TCAGGGMATAGTMAGAAAAGGTGAAATTTAGAGCTGRRCAAAAAAYWTKMRGACMRWGTTAYYTA  
RWGAARRACTCTAGTGAKACTGTTATMYGATAAATCTAGCAATTTTCGGGATTTTCTCGGCATAAARCT  
GTCCCATGTCATRTGAGATGTTTACGATAAGCTGTCCCATGTTGTAATTTTTCRTCCCWTAAGCTGTCCCA  
TGTCGAGTTTTGCRGCATAAGCTGTCCCATAKTTGAATTTTACAAATGATATCAGGWTTTCCGGAAAAT  
GTTTCAGGATTCCTCAGAGATGCTCGGACAGCTTTTTATGCGTATAAACTGAACATGATATARCTTTKWG  
ARAAAATAATRAACATGGGACAGCTTATGCTRCAAACTGGAACATRGGACAACCTYATGATGACAAAAT  
TGAACATGGGACAAATTGACTTGATGTTGTTTTTCATGGAGTTTTCTRRACAAAGTATACTAATCGAGGAA  
GTAGATTCTGAAAGAATATGCGAAAATAGAMCYTTTGTGATAAAAATGTCAAWMTCGCTYAAAAAGTA  
ACATGGGACAACATGCTGCACACGGCAGTCTAGCACACATGAATTGCACCGGAASCTTTTCTCAAKTGC  
TCCAATGCTGCGTCKCAWTCATTCCTGCTACCGCGRRGATTATRCGGAACACTGAATGGTTCGGATAR  
ATCRTCGACCACCTATAATTCACGAAGGMKYACAAGAAGCTCCGTCCGACYATCAGCAGCASCAATTA  
KTTACTATTGACAATTAGTTTTGCCATTTTGTGACAGGTATAGCCCCGCTAAAAGTATAGCTATAAATATGTT  
ATTTTGGCGTAGTCTAAATGTTGAAAACAGAAGAGTGAGGGTATGTTGAAATGATGTTGAYTKAGACGT

ATTATAAATACTTTTCCGTTATTGATTGCAGARRTTGCTCTCAGRGGTGCAAATTTAACGTATTTTGA  
TGTTTCAAAAAGCTTGACGTGTGAAGTTTGGTTATTTAAGAAACGTCTTGTAGATTACA  
AKTGCCGAACA  
GATATACAAATTA  
AAAAA  
AATGGAACAAA  
ACCCACGCTTTCATTGCTT  
GCTCGAAATTATTAARGAAT  
CCTRCTTCCAYCAGTTTAAAA  
AACTCCCGAACTTTRCTTGAGTAATAATCTGTAGTTAGCCAGAGGTT  
CAGTTATTCAAAA  
AAGTAAATATTACGATTGCAACATTTTGAACGGCACTGTAAGCCA  
AKTGGA  
AARGCTGCCATACTGCTCACACCGTAATTTGGAAAA  
AATAGAAAATTTAGAAAA  
AATGCACCATTTGATTGATTCAATCTGAATATTTCAACGCAATTCAGGGCGGTTGAATTTAAGATAGGTA  
AAAATCATATGTTTCA  
CCATAAATCTTAAATCGCAATCAAAAA  
AACTACCTTCCTGAAAATAAACCATTTTRMRTAAATTTGTTAT  
TAATTTGTTGTAGAAAATATCCCAAGCAACACGACTTGTTCAAAAGCCAGTACCAGCAACATCAGTGC  
AATTTATTCACTGTTCAAATTAAGGACAACAGAACACAATTGCTTCTTCTWYGAAGTACGCAAAA  
AGCGYRRAATTKYAAATCGTTATGCAACTWRAKMKGGGAATGATAAAAA  
AATGAAAAAATATATTCAGACTC  
GAACCATGGACACCAGGAGTATTAACCATTACCTTACATACTACAYAGAAGCTCTGTGAAAGATTTGC  
TGCTCAATRCCATAAARMYRCTGAAGTTACGCGTTRCTTCRRTTGATGMMRTCTTTRCCRCAAGTTAGA  
RAGCTGTCAAAA  
TGAAWGRRCRCGCAAGTTTCCGCAATACATWAAAMCCTAATCTRRACAAACAAA  
CCAGAGTAAGATGTTTCATGTGTGTACATAGCACATTTAATGCAARCTGACTGTATTGCCACTTGTGAG  
GAATATGTAAGCTCCGCCTCTATAAATCGATGTTAAATACGATGTTATTTGTAATTCCTATGAARYAAAG  
CTGCARCTTAACRWTATTTGGAGTTAAATGCAACKCAACTGACAAGATGGAAGTTGCGTGCCTTTTAT  
TRCARCTCTTTTAGACCAARGCATAGAAA  
ACCACATTTTGGATGATGTTGCAGGTGCTRCTTGGGATGRW  
YTTTGTCTTCATCACCAGAAGAGAACAATTTTGT  
CRCGTRTRTRGAGTCATAAAATTATATGTAATATATT  
TTTTYCTGT  
CAGTCGCTTTACGTAGTCTATATCTTCATTATGAGATGATATTTATATTATATGTAGTTC  
GTTATAAACAAGGCTCTCGCAAGTTATCATCCRCTATCAATTTTCCAATTTGAACCCATGCATGTGGTAT  
GTCATATAATAGTATTTTACAAATCGTATTACTAAA  
AGCAASMARCTTAGTTTCAACCAATAAATATATT  
TRTWMTATTGAGAGTGT  
TTTCCAAGTATCCATTGACGAACAGTAACTTTGTTAATGCATGAAAGCTAAA  
TGGAAAGCAATTATTARTACTATAAGAGTATTARGGATACATCTTTATATAACCTTTAAAATGTTTTATA  
AGCTMKMCATTTTTTGCCTGTTTAGKKMTATAAGTATCSCATACGACGTTAAAAATGCAAGGAATAAA  
ACAATCGAGTTAGTTCGAAACYKGAATTTTTAGCTWWCTTACTTATATAACAAGCTGTGTTACTTGGGG  
AGCAYGTT  
CGATACGATGGGCTGCTGCGGTGAACA  
ACTGGTTCGATGACRGT  
RCRAGAAGATTTTGGRW  
AYAAAAGAACCGCAGCGAGRGGCGGT  
CRTGCTGCAGCTWYRGGACTCCGTAGTACGTGGAACGATATAA  
AAGAACCGCGGAAACAGCGAATCCACGTCTTCCGGGAGAAAAAGCACCGCTTGGAAAGTGC  
GAAATGTGCATCGTCTACCACTACACACATCCCAAGCGATAGTGCGCACCTACGTGTGCACCTACCTTGC  
GCCCCACCGCAAGTGGAGAGAGAASACAAAGGCGAGKTGTTAATTGAACCTATCGTTTTTGT  
TTGATGAAGGATTTGCACCGGTGGTGT  
CATGCTACACGATAAGTTTTYRTCTGCAACAACCAGGCAGCTCATCAAAGCAGGCA  
TAAATTAGTTTGGTGM  
TARMRATGCAGATGTA  
AACAGAAAAATCGAAGAAAAATTTGGAGTGGAGA  
AAGCCCSGAAACAGTGTGGARGATTCAAGCAAGGAAATGGTGGACTTCGGTGAAGAGTTCTCCCGAC  
GGATTTATAGARGW  
TYCCTTRCRGGATCTATCCAYSAAATTTTCCCGAAAAGACTGCWGYAGAACATT  
TCCAAGCGGAAATTTTRCCTGATATTTTCTCCAA  
AATGTCTCACCGAGGATTTTCCAGTGAATTCCTCTAC  
CGARAATTCCTCCAGAATTTCCCR  
TAAATCTCCYCCTGGGATTTCACCGGAGATTCCACCRGGAGCTCC  
TCCCGGGKTTTTCTCCACGGAATTCCTCCATAATTC  
CGTCGRGGAATCCTCCTGAYWKT  
TTTTCRGGAAA  
TTCASCAGGAATTTCTTCCRGGATCCACTCAGGAATTAATCCGGAATTTCTCYCAGCATTTTTGTTTTCGG  
AATTCTCTAAAGAATACCTATGTGGAAAKTCAGGAATTCACCCAGGGATTTCTCAAGGAATTCTACCW  
GGGGTT  
CCTCKYSAATTC  
CAACCGAAGATATTTTTCAGGGATTCATCCAGRAGTTTCTCTAGAAATTT  
CTTACGAGATTTCYCAGGAATTTAC  
YGRGGACTCTTCCAGGAATTTCCATGGGGATTCTCAAGGAGT  
TCCTTTGGATATTTTCARCATTTTTTTGAGGTGATTCCTCTGAGTGAAA  
ACTGAATTTCTCCAGGTGCTMC  
TMRAGGAATGTTTTCTGGGATTCCTCTCGGAATATCACCRGGAACY  
YCAACTTTGAMAATTCTCAACGG  
GACACCTCCAAGAAGTCCCACTAAAGGKTTCTCCRGGAAATTTCGGAGATGAGGAAKTCCACRGGTCA  
TGT  
CRRTCGATCCTGAGCGACCATTTCAAAAATATCTGAAACTTTRCWYWGKTTTCCAATTT  
CATCTAAA  
TCGTCAATTTTTCGATATCAAACCTTCATATTC  
ACTCAMAGYTAACTTTTCAGAAGGGTGTATRCTAAAAC  
AGCTCAAAAATATTCWAAAAGCTGTACRGC  
AAGAAAACGGATTTTTCGATTGTT  
RTATAGATTTTCAAK  
MAAAGTTAGATAACTAAATGATGATTCCTTAGAAA  
ATATGCACACTGTAAAAAATTTATTTTTTTACTT  
AAAATATGATTTTTGT  
CAYAAAACTCAAATATCTCAAACCTATCTTTTTTACCAACGTTAATTTTTK  
G  
GAAATAGCGCYTTTATATCAGCTATCTACACCATAAGAATTTTGATGATGGTAAACTGATAAACAAAA

AGTTATGACATTTCAAACATTTCAACAATTTTTACATTTAGTAACAAAAAAATTTTTTTCTGTGTAAATTA  
TTTTGAGAATTATTTTTGATGCTGATTTYATTGTAARKYTACCGCCTRAGATTAACAAGTTGTTTTTC  
ATGAAGTACTTTTGTGTTGAATTATTCWKMATTTCTATAGTATCTATTTGAACTTRGAGCGCGATCGAGT  
GTTTTGATCAAAAATATTGARAGTGTCATACTTTWTATWRTACGTGACTGGTGAAAAAATCCCTTGATA  
ATGGTGTGAAAAGCTGTTGATTATAAGAAAAATGGAATTAACCTTATTTTTAAGACAAAAGCTGTATA  
ATAAAGTTTTATATACGCGTATWCGTCTAGTTTATCTTCAAAAAAATACCTCTTAGAGAACAGACTTTTA  
TGATCGGAAGAATGCGAGTAACTTCAACAACAACAAATGCATGAGAGTTACCTACCACGTGAGAAATCC  
ATCGCCCAGTTCACACTACCCCCACACCTGGTGAAATGTTTCAYGAAATACTGCGATGTGCAATATCGT  
CATCCAGAAGGCGCTAAKTARTGAAACGTCAAACGCAAAGAAAAATGATGGGCACTCTTCTAGKTATGA  
WAACYACAACCAAGATTCAAATGATCGTTAAARKSRTGGTCARTRRAAAATTTTCGTCAAGTGTACRRTT  
GTTTGTCTGTATACATACCATGACAATGCTCACGAAAAAGCTAAAAAAAAAAAAATACTACCGCTATGG  
ATAKTAATAGTAAATTTTTCTCAGCCAAGCARSCAACCCAACTAGTCAGTTAAACTAATAGAGTG  
ATTTTGTTTTATTATAATCTAACGAACAAGCATGAGMCAGTCGCTTTCTCAAAAAGGTCTTCCAACCTCAA  
CTCTCTTGTAGACCGTTTGATGAAAAAAATGATCAAAGGAGTTACGAAATCTCACCGAAAGCASC  
ATAGATAATCTAGAAAAGAGACTGGTTATGCTSCAAATTGAATCCAAATTTACGCATTTGCACGTCTCGCC  
GTCTAGACTTTGTRSAARCRRGCCATCTGTATATCATCAGTAAAAGCAGGGGCGTAGGAAGTTGAAAA  
CGACAACAACCTGAGAAATTGCCAGAAGTGCTAAGTGCAGAGAGTCATGTCACCGTACCRTCAGCAGYGA  
CATCAGTTTAAACAATTAATCACGCCCTTTTCAAAAATGCTTTGWKATATACTTCAACATCTATRCCCA  
TTTTYMATATTTTTAACGTTGYWRARCACGCTTCAACATTTCTRTTGAAGAAGGAAAACACTTGWYMT  
AAATGTAAACAGCAAAATAATGGAATAMWYGACTAATGCGCAGGAAGCTGTGGCTKTKMWAAAATCGG  
AACATTACTGTACATATAATATACATAATACATAATAAAAACRGCTTGTTRCTCACGCAAAGGCCATT  
AACAATAAAATCAGCATCAAGCTGCGATTTTCMGSCGAAATAACACTAAAAAAAAAAAAATTACTAAA  
TGTAATAAATTGTGAAATGTTGAATTGTCATAACTTTTTGTTTATTAGTTTATCATCACCAAATTTTTATR  
GTAGATTGCTAATAACAATGGACCGTTTTCCCTAAAAAATTGCGTTGGTAAAAAGATAGGGTTTTGAAAT  
ATTTGAGTTTTTTGTGACAAAAATGATATTTTTTAATGTTAAAAAAGATTTTTTTTTCACAGTGTATATTT  
CTTARRRATCACCATTTAGTTATCTAACTTTGCTGAACAATAAAATCAGCATCAAACCTTTCGATTTCTGA  
CCGAGAATAAATTTACACAGAAAAAATATTTACCAAATGTGAAAWTKGYRAAATGTTTGAAATGTTATA  
ACTTTTTTGTATTAGTTTACCATCACYRAATTTTTTATGGTAGATTGCTAATAACAATGGACCGTCTTCC  
TMWAAAAATTGCGTTGGTAAAAGATAGGGTTTTKRGATATTTGAGTTTTTTGTGACAAAAATGATATTT  
ATTATTAATAAAGATGTTTTTTTTTTCACAGTGTATATTTTCATAGGAATCACCATTTAGTTATCTAACTT  
TGCTGAAAAATTCATAGCAATCRRWYGAACCATTTTGAARCWKTACCAGATTTTGAATATTATTGAA  
CCATTTTCACATACACCCTTTCGAAAAGTTGAGTCGTGRTTCAAAAATAAAAATTTGATATCGAAAAATGG  
CGATTTAGATGGAACCTGAAAAACTGYWRARAKTTCAGTTCAATAAGAAARTCATGAATTAATAAATTTCC  
TTAATTTTGATGCTGTTRCTTKGAATCGCTCAGAYYWCTCAGGACATCCTTCAGGGATTCTTTCAGGAAG  
CCCTCSGGGATTCTTCCCTTGTTTTCCACCAAGAAATCCTCMAAAAATTCCTCCGGAGATTCTATAGAGAT  
ACCTTCGGGGAAATCTACTGGAATTCCTCAGGATTTTTTTCCAGGAATGCCTCTGTGGATAACTCCAG  
GAATTTCTCTACAGATATTCCTCAGGGGACTCCTCCTAGGGTTCCTCTGAAAATTTCTCAAAAATTT  
CTAGGGATAACTCCARGAATTCCTCACGGGGACTCCTCCTAGGGTTCCTCTGAAAATTTCTCAAAAATTT  
CCCAYSAGGAATTCCTCCACGAATTCCTTCRGGTAGTTCTCCAGCATTATATACTGAGATTCTTCCRGA  
ATTCTTCTGTTATTTCCCCAGATATTACTCCGGGAATCCTCCATAAATTCCTCCGAGGATATCTCCAGGG  
AATCCACCGGGGATTCTTTCAAGGGACTCCACCTGGGATTCTTCCAAAAACTCTTCTCCCGARAATCCG  
CCAGGGTTTCTCTGAGAATTTTYCGMGAGGATTTCTCCAGGRGTTCCACTGGAAAGTCTTCTGGAGATA  
ACTCCAAGATTTCTCCGAGGATTTACCGGGGATTTCTTAAGAGCTCCTCGGAGAATCACTCCASAAGT  
TTTCTCCGAGGATTCAGGGATTTCAATTAGAGATTTTCTTCCAGGATCGAAACGTTGGCAATGGTATAAATT  
TATCAACGCTTTTTTTTCGTGACTGGMAAGCCGAAAAACTCATAACTCTCTTCCAGGATTCCTCAACTTGA  
AGCAATCCTCATTGGAAKTTCTGAAGTAATCCCTGGAGAAATTCAAGGAATAAATTCCTCCGAGGAACTTC  
TWMAGAAATCCCTAGAGGAATTCTTGGAGTTATCTCCAGAGGAATTGCTGGAACGATCCCTGGAAATGG  
CTGAGATRCCCRGAGGAATCCTTGGAGGAATTTCTGGAGAAATCCGCGGTGTAATTTCTRGAGGAGTC  
GCTGGAGGACTTCYGRCGGAATCCCCAGTGAACACTMSAGGAGTCCCCAAAGGGAATTCCTGGRRATGT  
CTCRGAGAAATTCGTGGAGGAATCCCCGAGGAAATTCAGATATTCTTAAGAAATATTCCAGGAATTC  
ATTTAGAGGTTCTGCAGAGAATCCTTCTAACATGACTTCAGAACTTCTTMRGGGATTCTCCAGGAAT

TCCTTCAGAGATTCCCTTCGAAATTCCTTTGAAGATTCCCTCCCAGGAAATTCCTCCGGAGATATCTGCAGG  
ATTTTATTCAAAGATTTCTCCAAGAAKTACTCAGARTYCCGGATAAGGAGAGTTCGACTGTTGCGATCTA  
TAGAGCTATTAWTTCTGTRTTRSAGTCTTGGGGAATAAATCGATAGTTTAAGATTTTTCCCTTTTTTTTC  
CTAAAACATCAKTTTAATTCCCATGCCGAAGTGCAGTAGCTCTCCAGAATTCCTCCAGAAATTCCTCA  
AGAACTTTCTTCCGGRGATTCCCTCAAGGGATTCCCTCCAGGAATTCCTTCATGGGTTTTCTCCATAAATTC  
RTCCGRGGATTCCCTCAAGARATCCTGCKGGAATTCGTTTCAGATATTTCTTCAGGGAATCCTCCAGAAAT  
ACCTWSCAGWGATTCCATCTGGARTCCCTTTAGAAATTCASMTCARRRATTCTCTCGAGGRAGTTCCTCC  
AGRRATTCAGCWYKAGGATCCTATCAAAGAATTCCTTCMGRGATTCTTCTGGAATTCMTTCARGRAKT  
YCTCCAGAATTTTTTCAGAAATCCTTCCGGAATTCCTTTGRRRATTCYYCAGGAATTCCTCCGRGGATAC  
CTCCACGAATTTATTTCAGAGATTCCTCCAGGAACTCCTTCAGGGAATTACTCAATTCCTCCAGGGWTYC  
CTTCARGGATTCTGCAGGAATTT
